# Supplementary material for: Enantioselective N-alkylation of isatins and synthesis of chiral N-alkylated indoles
Source: Royal Society of Chemistry journal article supplement (doi:10.1039/c4cc04586f), 2014-01-01

# Enantioselective N-Alkylation of Isatins and Synthesis of Chiral N- Alkylated Indoles

Xiaowei Dou, Weijun Yao, Chunhui Jiang and Yixin Lu\*

*Department of Chemistry & Medicinal Chemistry Program, Life Sciences Institute*

*National University of Singapore, 3 Science Drive 3, Singapore, 117543, Republic of Singapore*

Email: [chmlyx@nus.edu.sg](mailto:chmlyx@nus.edu.sg)

## Supporting Information

|           |                                            |     |
|-----------|--------------------------------------------|-----|
| <b>A.</b> | General Information                        | S2  |
| <b>B.</b> | Preparation of Isatin Ketals               | S2  |
| <b>C.</b> | Representative Procedure                   | S4  |
| <b>D.</b> | Analytical Data of the Products            | S10 |
| <b>E.</b> | NMR Spectra of the Substrates and Products | S38 |

## A. General Information

All the starting materials were obtained from commercial sources and used without further purification unless otherwise stated.  $^1\text{H}$  and  $^{13}\text{C}$  NMR spectra were recorded on a Bruker ACF300 or AMX500 (500 MHz) spectrometer. Chemical shifts were reported in parts per million (ppm), and the residual solvent peak was used as an internal reference: proton (chloroform  $\delta$  7.26), carbon (chloroform  $\delta$  77.0). Multiplicity was indicated as follows: s (singlet), d (doublet), t (triplet), q (quartet), m (multiplet), dd (doublet of doublet), br s (broad singlet). Coupling constants were reported in Hertz (Hz). Low resolution mass spectra were obtained on a Finnigan/MAT LCQ spectrometer in ESI mode. All high resolution mass spectra were obtained on a Finnigan/MAT 95XL-T spectrometer. Melting point (M.P.) was measured using BÜCHI Melting Point B-540. For thin layer chromatography (TLC), Merck pre-coated TLC plates (Merck 60 F254) were used, and compounds were visualized with a UV light at 254 nm. Further visualization was achieved by staining with iodine, or ceric ammonium molybdate followed by heating on a hot plate. Flash chromatographic separations were performed on Merck 60 (0.040-0.063 mm) mesh silica gel.

## B. Preparation of Isatin Ketals.

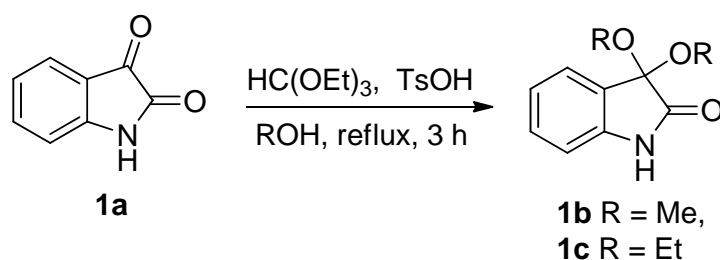

Isatin **1a** (441.3 mg, 3 mmol) was suspended in alcohol (ROH, 15.0 mL) at room temperature under an atmosphere of argon. Triethyl orthoformate (0.5 mL, 3 mmol) and *p*-toluenesulfonic acid monohydrate (28.5 mg, 0.15 mmol) were added and the reaction mixture was brought to reflux for 3 h. At the end of the reaction, excess solvent was removed and the residue was purified by flash chromatography (hexane/ethyl acetate 2:1) to provide ketals **1b** or **1c** as a white solid.

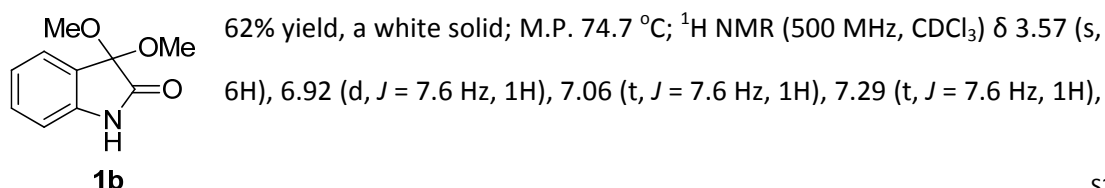

7.39 (d,  $J = 6.9$  Hz, 1H), 9.24 (br s, 1H);  $^{13}\text{C}$  NMR (125 MHz,  $\text{CDCl}_3$ )  $\delta$  50.81, 97.45, 111.06, 122.63, 124.98, 125.02, 130.70, 140.62, 173.39; HRMS (ESI)  $m/z$  calcd for  $\text{C}_{10}\text{H}_{10}\text{NO}_3$   $[\text{M}-\text{H}]^-$  = 192.0666, found = 192.0659.

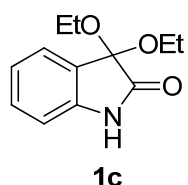

56% yield, a white solid; M.P. 92.4 °C;  $^1\text{H}$  NMR (500 MHz,  $\text{CDCl}_3$ )  $\delta$  1.24 (t,  $J = 7.0$  Hz, 6H), 3.72-3.83 (m, 2H), 3.90-3.96 (m, 2H), 6.91 (d,  $J = 7.6$  Hz, 1H), 7.04 (t,  $J = 7.6$  Hz, 1H), 7.28 (t,  $J = 6.3$  Hz, 1H), 7.39 (d,  $J = 7.6$  Hz, 1H), 9.11 (br s, 1H);  $^{13}\text{C}$  NMR (125 MHz,  $\text{CDCl}_3$ )  $\delta$  15.24, 58.89, 97.36, 110.93,

122.62, 125.03, 125.87, 130.47, 140.53, 173.90; HRMS (ESI)  $m/z$  calcd for  $\text{C}_{12}\text{H}_{14}\text{NO}_3$   $[\text{M}-\text{H}]^-$  = 220.0979, found = 220.0975.

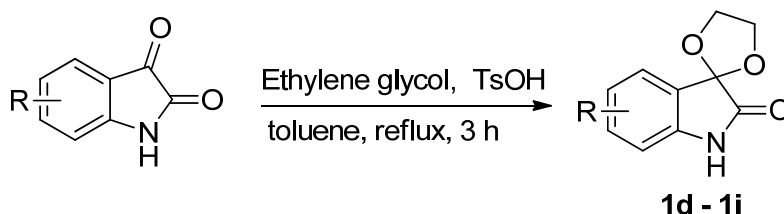

Isatin (3 mmol) was suspended in toluene (15.0 mL) at room temperature under an atmosphere of argon. Ethylene glycol (0.2 mL, 3.6 mmol) and *p*-toluenesulfonic acid monohydrate (28.5 mg, 0.15 mmol) were added and the reaction mixture was brought to reflux for 3 h. At the end of the reaction, excess solvent was removed and the residue was purified by flash chromatography (hexane/ethyl acetate 2:1) to provide ketals.

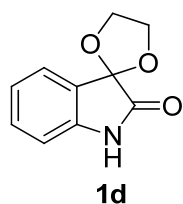

82% yield, a white solid; M.P. 133.4 °C;  $^1\text{H}$  NMR (500 MHz,  $\text{CDCl}_3$ )  $\delta$  4.29-4.36 (m, 2H), 4.53-4.60 (m, 2H), 6.82 (d,  $J = 7.6$  Hz, 1H), 7.05 (t,  $J = 7.6$  Hz, 1H), 7.27-7.30 (m, 1H), 7.35 (d,  $J = 7.6$  Hz, 1H), 8.76 (br s, 1H);  $^{13}\text{C}$  NMR (125 MHz,  $\text{CDCl}_3$ )  $\delta$  65.82, 102.40, 110.80, 123.28, 124.38, 125.05,

131.61, 141.87, 175.84; HRMS (ESI)  $m/z$  calcd for  $\text{C}_{10}\text{H}_8\text{NO}_3$   $[\text{M}-\text{H}]^-$  = 190.0510, found = 190.0501.

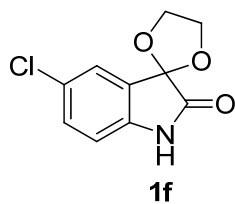

80% yield, a white solid; M.P. 179.3 °C;  $^1\text{H}$  NMR (500 MHz,  $\text{CDCl}_3$ )  $\delta$  4.29-4.35 (m, 2H), 4.51-4.58 (m, 2H), 6.77 (d,  $J$  = 8.2 Hz, 1H), 7.26-7.28 (m, 1H), 7.32 (d,  $J$  = 2.6 Hz, 1H), 8.61 (br s, 1H);  $^{13}\text{C}$  NMR (125 MHz,  $\text{CDCl}_3$ )  $\delta$  65.98, 102.04, 111.81, 125.65, 126.07, 128.69, 131.48, 140.21, 175.40; HRMS (ESI)  $m/z$  calcd for  $\text{C}_{10}\text{H}_7\text{ClNO}_3$   $[\text{M}-\text{H}]^-$  = 224.0120, found = 224.0122.

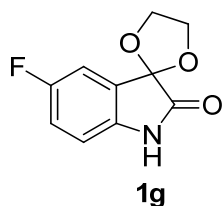

86% yield, a white solid; M.P. 174.5 °C;  $^1\text{H}$  NMR (500 MHz,  $\text{CDCl}_3$ )  $\delta$  4.29-4.36 (m, 2H), 4.53-4.59 (m, 2H), 6.77 (dd,  $J$  = 4.4 Hz, 6.3 Hz, 1H), 7.00-7.04 (m, 1H), 7.09 (dd,  $J$  = 2.6 Hz, 7.6 Hz, 1H), 8.11 (br s, 1H);  $^{13}\text{C}$  NMR (125 MHz,  $\text{CDCl}_3$ )  $\delta$  65.96, 102.12, 111.36, 111.42, 113.04, 113.24, 117.97, 118.16, 125.92, 125.99, 137.57, 158.38, 160.31, 175.40; HRMS (ESI)  $m/z$  calcd for  $\text{C}_{10}\text{H}_7\text{FNO}_3$   $[\text{M}-\text{H}]^-$  = 208.0415, found = 208.0414.

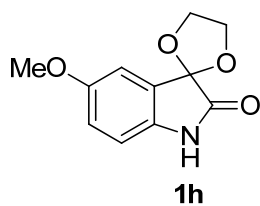

82% yield, a white solid; M.P. 160.5 °C;  $^1\text{H}$  NMR (500 MHz,  $\text{CDCl}_3$ )  $\delta$  3.76 (s, 3H), 4.29-4.35 (m, 2H), 4.53-4.60 (m, 2H), 6.73 (d,  $J$  = 8.3 Hz, 1H), 6.82-6.84 (m, 1H), 6.94 (d,  $J$  = 2.6 Hz, 1H), 8.53 (br s, 1H);  $^{13}\text{C}$  NMR (125 MHz,  $\text{CDCl}_3$ )  $\delta$  55.84, 65.89, 102.70, 111.21, 111.47, 117.12, 125.38, 135.08, 156.34, 175.85; HRMS (ESI)  $m/z$  calcd for  $\text{C}_{11}\text{H}_{10}\text{NO}_4$   $[\text{M}-\text{H}]^-$  = 220.0615, found = 220.0613.

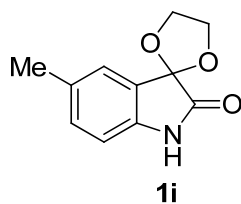

85% yield, a white solid; M.P. 143.1 °C;  $^1\text{H}$  NMR (500 MHz,  $\text{CDCl}_3$ )  $\delta$  2.30 (s, 3H), 4.29-4.35 (m, 2H), 4.53-4.60 (m, 2H), 6.71 (d,  $J$  = 7.6 Hz, 1H), 7.09 (d,  $J$  = 8.2 Hz, 1H), 7.18 (s, 1H), 8.25 (br s, 1H);  $^{13}\text{C}$  NMR (125 MHz,  $\text{CDCl}_3$ )  $\delta$  20.91, 65.82, 102.50, 110.46, 124.31, 125.75, 131.92, 132.98, 139.31, 175.53; HRMS (ESI)  $m/z$  calcd for  $\text{C}_{11}\text{H}_{10}\text{NO}_3$   $[\text{M}-\text{H}]^-$  = 204.0666, found = 204.0665.

### **C. Representative Procedure.**

#### **4f-Catalyzed addition of 1d to enal 2a.**

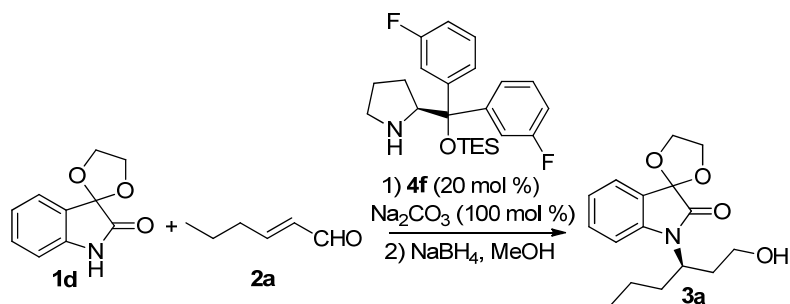

Isatin ketal **1d** (38.2 mg, 0.2 mmol),  $\text{Na}_2\text{CO}_3$  (21.2 mg, 0.2 mmol) and **4f** (16.1 mg, 0.04 mmol) were suspended in  $\text{CHCl}_3$  (1.0 mL) under an atmosphere of argon. Enal **2a** (46.4  $\mu\text{L}$ , 0.4 mmol) was added and the reaction mixture was stirred at room temperature for 3 d. At the end of the reaction, the mixture was directly subject to a short pad of silica gel with dichloromethane as eluent to get crude product, which was then dissolved in MeOH (2 mL) and cooled to 0 °C.  $\text{NaBH}_4$  (22.8 mg, 0.6 mmol) was added and the reaction was stirred at 0 °C for 15 min. The reaction solution was quenched by addition of 0.5 N HCl. The resulting mixture was extracted with EtOAc several times (5 mL $\times$ 3) and combined. Removal of the organic phase and purification of the residue by flash chromatography (hexane/ethyl acetate 2:1) afforded **3a** as a colorless oil (42.5 mg, 73% yield).

#### Conversion of chiral isatin ketal **3** to indole **6**.

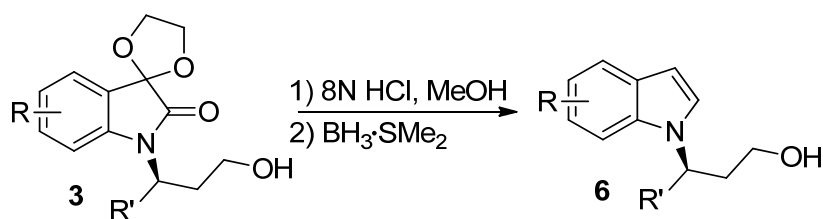

Isatin ketal **3** (0.1 mmol) was dissolved in MeOH (1.0 mL) and cooled to 0 °C, 8N HCl (1.0 mL) was then added and the resulting solution was stirred at room temperature for 16 h. The reaction was then extracted with EtOAc (5 mL $\times$ 3). The combined organic phases were dried over anhydrous  $\text{Na}_2\text{SO}_4$  and then concentrated under reduced pressure. The red residue was then dissolved in THF (1.0 mL) under an atmosphere of argon and cooled to 0 °C,  $\text{BH}_3 \cdot \text{SMe}_2$  (0.3 mL, 2 M solution in THF) was then added and the resulting solution was

stirred at room temperature for 12 h. MeOH (0.5 mL) and 1N HCl (2 mL) was added at 0 °C to quench the reaction and the mixture was extracted with EtOAc (5 mL×3). Removal of the organic phase and purification of the residue by flash chromatography (hexane/ethyl acetate 2:1) afforded indole **6** as a colorless oil.

### Diverse indole synthesis.

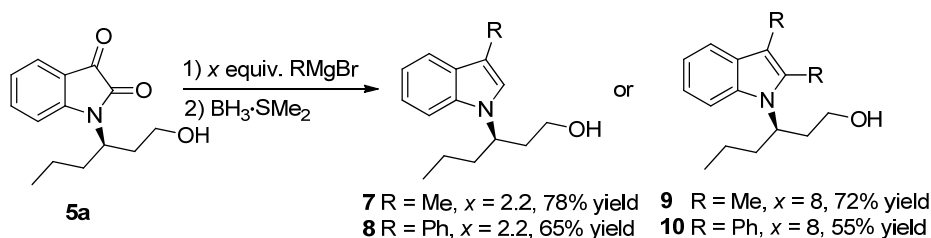

Preparation of **7, 8**: **5a** (49.5 mg, 0.2 mmol) in THF (2.0 mL) was cooled to 0 °C under an atmosphere of argon. Grignard reagent (0.44 mmol) was added in a dropwise manner. After stirring at 0 °C for 1 h. The reaction was quenched by addition of 1N HCl and the mixture was extracted with EtOAc (5 mL×3). The combined organic phases were dried over anhydrous Na<sub>2</sub>SO<sub>4</sub>, filtered and concentrated to give the crude 3-hydroxy oxindole intermediate, which was then dissolved THF (1.0 mL) and cooled to 0 °C. BH<sub>3</sub>·SMe<sub>2</sub> (0.5 mL, 2 M solution in THF) was added to the reaction solution, and the resulting reaction solution was stirred at 0 °C to room temperature for 12 h. MeOH (0.5 mL) and 1N HCl (3 mL) were added at 0 °C to quench the reaction and the mixture was extracted with EtOAc (6 mL×3). Removal of the combined organic phase and purification of the residue by flash chromatography (hexane/ethyl acetate 2:1) afforded indole **7** or **8** as a colorless oil.

**7**: A colorless oil; <sup>1</sup>H NMR (300 MHz, CDCl<sub>3</sub>) δ 0.87 (t, *J* = 7.3 Hz, 3H), 1.08-1.28 (m, 2H), 1.73-1.99 (m, 2H), 2.00-2.12 (m, 2H), 2.35 (d, *J* = 1.0 Hz, 3H), 3.21-3.29 (m, 1H), 3.46-3.53 (m, 1H), 4.49-4.58 (m, 1H), 6.91 (s, 1H), 7.07-7.12 (m, 1H), 7.16-7.21 (m, 1H), 7.37 (d, *J* = 13.7 Hz, 1H), 7.55-7.58 (m, 1H); <sup>13</sup>C NMR (75 MHz, CDCl<sub>3</sub>) δ 9.76, 13.80, 19.52, 38.11, 38.40, 52.07, 59.37, 109.21, 111.03, 118.45, 118.95, 121.27, 121.67, 128.32, 137.04; HRMS (ESI) *m/z* calcd for C<sub>15</sub>H<sub>22</sub>NO [M+H]<sup>+</sup> = 232.1696, found = 232.1699.

**8:** A colorless oil;  $^1\text{H}$  NMR (300 MHz,  $\text{CDCl}_3$ )  $\delta$  0.89 (t,  $J = 7.1$  Hz, 3H), 1.14-1.31 (m, 2H), 1.83-2.04 (m, 2H), 2.08-2.16 (m, 2H), 3.28-3.36 (m, 1H), 3.52-3.59 (m, 1H), 4.61-4.71 (m, 1H), 7.16-7.33 (m, 4H), 7.43-7.50 (m, 3H), 7.70 (dd,  $J = 1.2$  Hz, 8.3 Hz, 2H), 7.97 (dd,  $J = 1.2$  Hz, 7.6 Hz, 1H);  $^{13}\text{C}$  NMR (75 MHz,  $\text{CDCl}_3$ )  $\delta$  13.80, 19.52, 38.05, 38.35, 52.40, 59.18, 109.81, 117.56, 119.86, 119.96, 121.83, 121.97, 125.73, 125.85, 127.28, 128.72, 135.68, 137.61; HRMS (ESI)  $m/z$  calcd for  $\text{C}_{20}\text{H}_{24}\text{NO}$   $[\text{M}+\text{H}]^+ = 294.1852$ , found =294.1855.

Preparation of **9**, **10**: **5a** (49.5 mg, 0.2 mmol) in THF (1.0 mL) was cooled to 0 °C under an atmosphere of argon. Grignard reagent (1.60 mmol) was then added in a dropwise manner. After stirring at 0 °C for 2 h.  $\text{BH}_3\text{-SMe}_2$  (0.5 mL, 2 M solution in THF) was added to the reaction solution, and the resulting reaction solution was stirred at 0 °C to room temperature (1h for MeMgBr, 6h for PhMgBr). MeOH (0.5 mL) and 1N HCl (3 mL) were added at 0 °C to quench the reaction and the mixture was extracted with EtOAc (6 mL $\times$ 3). Removal of the combined organic phase and purification of the residue by flash chromatography (hexane/ethyl acetate 2:1) afforded indole **9** or **10** as a colorless oil.

**9:** A colorless oil;  $^1\text{H}$  NMR (500 MHz,  $\text{CDCl}_3$ )  $\delta$  0.87 (t,  $J = 7.3$  Hz, 3H), 1.05-1.11 (m, 1H), 1.22-1.28 (m, 1H), 1.52 (br s, 1H), 1.77-1.84 (m, 1H), 2.00-2.07 (m, 1H), 2.27-2.29 (m, 4H), 2.38 (s, 3H), 2.46-2.51 (m, 1H), 3.19-3.24 (m, 1H), 3.46-3.50 (m, 1H), 4.45-4.51 (m, 1H), 7.07-7.11 (m, 2H), 7.41 (t,  $J = 4.4$  Hz, 1H), 7.52 (t,  $J = 4.4$  Hz, 1H);  $^{13}\text{C}$  NMR (125 MHz,  $\text{CDCl}_3$ )  $\delta$  9.09, 10.85, 13.98, 20.09, 36.25, 36.34, 52.54, 59.61, 105.89, 111.21, 118.23, 118.27, 119.90, 129.79, 133.78, 133.87; HRMS (ESI)  $m/z$  calcd for  $\text{C}_{16}\text{H}_{24}\text{NO}$   $[\text{M}+\text{H}]^+ = 246.1852$ , found =246.1859.

**10:** A colorless oil;  $^1\text{H}$  NMR (500 MHz,  $\text{CDCl}_3$ )  $\delta$  0.83 (t,  $J = 7.3$  Hz, 3H), 1.11-1.19 (m, 1H), 1.23-1.32 (m, 2H), 1.86-1.93 (m, 1H), 2.03-2.09 (m, 1H), 2.26-2.34 (m, 1H), 2.50-2.57 (m, 1H), 3.35-3.40 (m, 1H), 3.43-3.48 (m, 1H), 4.33-4.39 (m, 1H), 7.15-7.20 (m, 2H), 7.24-7.29 (m, 5H), 7.33-7.40 (m, 5H), 7.61 (d,  $J = 8.1$  Hz, 1H), 7.82 (d,  $J = 7.6$  Hz, 1H);  $^{13}\text{C}$  NMR (75 MHz,  $\text{CDCl}_3$ )  $\delta$  13.91, 19.97, 29.65, 36.53, 53.43, 59.74, 112.27, 115.15, 119.87,

119.96, 121.58, 121.97, 125.39, 127.97, 128.21, 128.38, 129.85, 131.63, 132.48, 134.51, 135.04, 138.94; HRMS (ESI)  $m/z$  calcd for  $C_{26}H_{28}NO$   $[M+H]^+ = 370.2165$ , found = 370.2168.

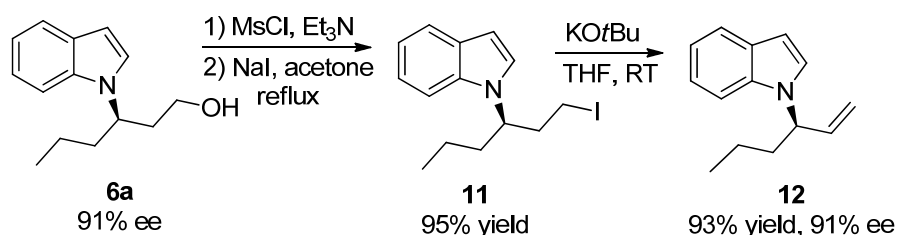

Preparation of **11**: Indole **6a** (20.3 mg, 0.1 mmol) was stirred in CH<sub>2</sub>Cl<sub>2</sub> (1.0 mL) at 0 °C under an atmosphere of argon. Et<sub>3</sub>N (35  $\mu$ L, 0.25 mmol) and MsCl (12  $\mu$ L, 0.15 mmol) was added and the reaction solution was stirred at 0 °C for 15 min. The reaction was directly subject to a short pad of silica gel with dichloromethane as eluent. Removal of the solvent afforded the crude mesylated product, which was used for next step without further purification. The crude product was then dissolved in acetone (3.0 mL), followed by addition of NaI (74.5 mg, 0.5 mmol). The resulting reaction mixture was brought to reflux for 3 h. At the end of the reaction, the reaction solution was concentrated and purified by flash chromatography (hexane/CH<sub>2</sub>Cl<sub>2</sub> 10:1) to provide indole **11** as a colorless oil (29.7 mg, 95% yield for two steps).

**11**: A colorless oil; <sup>1</sup>H NMR (500 MHz, CDCl<sub>3</sub>)  $\delta$  0.86 (t,  $J = 7.6$  Hz, 3H), 1.10-1.14 (m, 1H), 1.20-1.26 (m, 1H), 1.78-1.85 (m, 1H), 1.92-1.99 (m, 1H), 2.29-2.36 (m, 1H), 2.41-2.48 (m, 1H), 2.78-2.83 (m, 1H), 3.00-3.04 (m, 1H), 4.49-4.55 (m, 1H), 6.57 (d,  $J = 3.2$  Hz, 1H), 7.10-7.13 (m, 2H), 7.20-7.24 (m, 1H), 7.48 (d,  $J = 8.2$  Hz, 1H), 7.64 (d,  $J = 8.2$  Hz, 1H); <sup>13</sup>C NMR (125 MHz, CDCl<sub>3</sub>)  $\delta$  2.37, 13.71, 19.43, 37.46, 39.66, 56.37, 102.33, 109.83, 119.43, 120.98, 121.48, 124.17, 128.41, 136.52;  $[\alpha]_D^{25} = -29.60$  ( $c = 0.75$ , CHCl<sub>3</sub>).

Preparation of **12**: Indole **11** (18.8 mg, 0.06 mmol) was stirred in THF (1.2 mL) at room temperature under an atmosphere of argon. KO<sup>t</sup>Bu (33.6 mg, 0.3 mmol) was added and the reaction mixture was stirred for 5 min before quenching with 1N HCl. The resulting mixture was extracted with EtOAc (5 mL $\times$ 3). Removal of the combined organic phases and



purification of the residue by flash chromatography (hexane/CH<sub>2</sub>Cl<sub>2</sub> 10:1) yielded indole **12** as a colorless oil (11.1 mg, 93% yield).

**12**: A colorless oil; <sup>1</sup>H NMR (500 MHz, CDCl<sub>3</sub>) δ 0.93 (t, *J* = 7.6 Hz, 3H), 1.21-1.37 (m, 2H), 1.93-2.07 (m, 2H), 4.90 (dd, *J* = 6.3 Hz, 14.5Hz, 1H), 5.05 (dd, *J* = 1.3 Hz, 17.0Hz, 1H), 5.14-5.17 (m, 1H), 6.00-6.07 (m, 1H), 6.56 (d, *J* = 3.2 Hz, 1H), 7.10-7.13 (m, 1H), 7.17-7.22 (m, 2H), 7.37 (d, *J* = 8.2 Hz, 1H), 7.65 (d, *J* = 7.6 Hz, 1H); <sup>13</sup>C NMR (125 MHz, CDCl<sub>3</sub>) δ 13.78, 19.50, 36.40, 57.91, 101.54, 109.77, 115.91, 119.34, 120.94, 121.27, 125.00, 128.59, 136.14, 137.98; The ee value was 91%, *t*<sub>R</sub> (minor) = 5.55 min, *t*<sub>R</sub> (major) = 6.13 (Chiralcel OD-H, λ = 254 nm, 1% iPrOH/hexanes, flow rate = 1.0 mL/min); HRMS (EI) *m/z* calcd for C<sub>14</sub>H<sub>17</sub>N (M<sup>+</sup>) = 199.1361, found = 199.1362; [α]<sub>D</sub><sup>25</sup> = -7.38 (c = 1.00, CHCl<sub>3</sub>).

<Chromatogram>

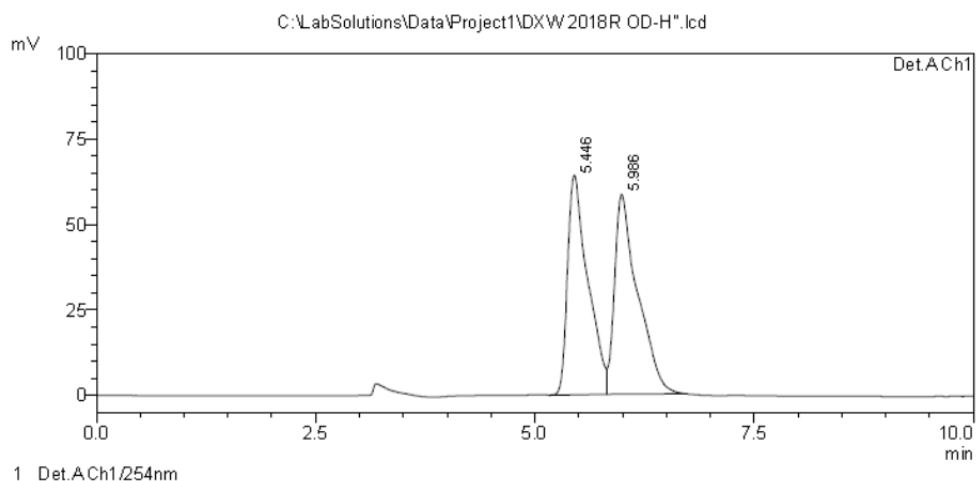

PeakTable

| Peak# | Ret. Time | Area    | Height | Area %  | Height % |
|-------|-----------|---------|--------|---------|----------|
| 1     | 5.446     | 1032677 | 64312  | 48.909  | 52.349   |
| 2     | 5.986     | 1078757 | 58542  | 51.091  | 47.651   |
| Total |           | 2111434 | 122854 | 100.000 | 100.000  |

(racemic **12**)

<Chromatogram>

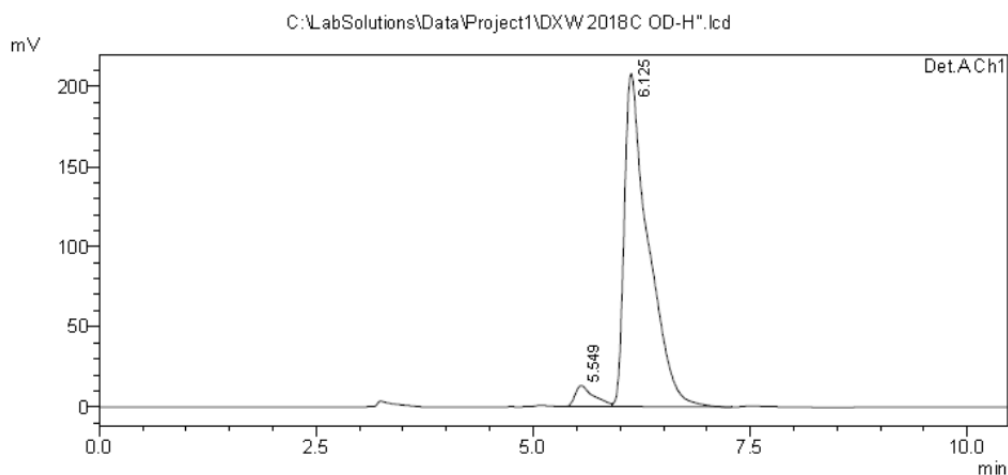

PeakTable

| Peak# | Ret. Time | Area    | Height | Area %  | Height % |
|-------|-----------|---------|--------|---------|----------|
| 1     | 5.549     | 194255  | 12880  | 4.651   | 5.838    |
| 2     | 6.125     | 3981947 | 207726 | 95.349  | 94.162   |
| Total |           | 4176202 | 220606 | 100.000 | 100.000  |

(enantiomerically enriched **12**)

The absolute configuration of **12** was determined to be *R* by comparison with the reported compound<sup>[1]</sup>. The absolute configurations of other chiral indoles and isatin ketal products were assigned by analogy.

**D. Analytical Data of the Products.**

***(R)*-1'-(1-Hydroxyhexan-3-yl)spiro[[1,3]dioxolane-2,3'-indolin]-2'-one **3a****

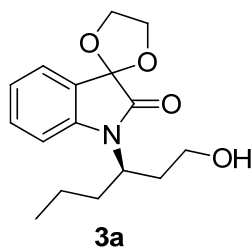

A colorless oil; <sup>1</sup>H NMR (500 MHz, CDCl<sub>3</sub>) δ 0.89 (t, *J* = 7.6 Hz, 3H), 1.27-1.35 (m, 2H), 1.64-1.71 (m, 1H), 1.88-2.03 (m, 4H), 3.46-3.51 (m, 1H), 3.61 (t, *J* = 5.4 Hz, 1H), 4.28-4.33 (m, 2H), 4.52-4.60 (m, 2H), 6.95 (d, *J* = 8.2 Hz, 1H), 7.07 (t, *J* = 7.6 Hz, 1H), 7.30-7.33 (m, 1H), 7.36 (d, *J* = 7.6 Hz, 1H); <sup>13</sup>C NMR (125 MHz, CDCl<sub>3</sub>) δ 13.68, 19.75,

33.79, 34.11, 59.03, 65.80, 65.88, 101.76, 123.05, 124.37, 125.03, 131.51, 174.51; The ee value was 91%, *t<sub>R</sub>* (minor) = 25.08 min, *t<sub>R</sub>* (major) = 21.74 (Chiralcel ID, λ = 254 nm, 10%

iPrOH/hexanes, flow rate = 1.0 mL/min); HRMS (ESI)  $m/z$  calcd for  $C_{16}H_{21}NNaO_4 [M+Na]^+$  = 314.1361, found = 314.1371;  $[\alpha]_D^{25} = 1.48$  ( $c = 1.03$ ,  $CHCl_3$ ).

<Chromatogram>

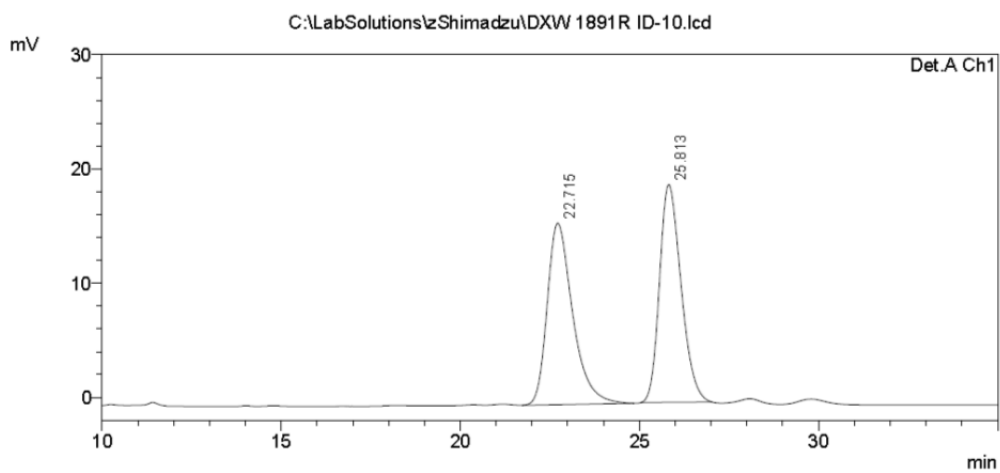

PeakTable

| Peak# | Ret. Time | Area    | Height | Area %  | Height % |
|-------|-----------|---------|--------|---------|----------|
| 1     | 22.715    | 785968  | 15890  | 49.672  | 45.462   |
| 2     | 25.813    | 796351  | 19062  | 50.328  | 54.538   |
| Total |           | 1582319 | 34952  | 100.000 | 100.000  |

(racemic **3a**)

<Chromatogram>

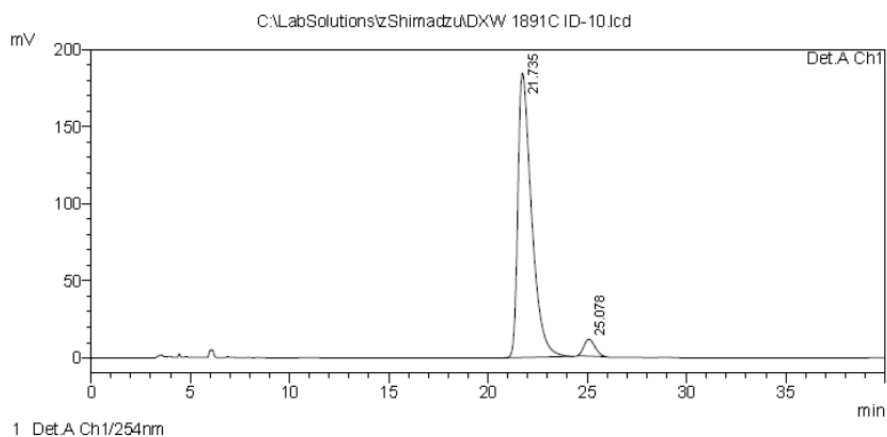

PeakTable

| Peak# | Ret. Time | Area    | Height | Area %  | Height % |
|-------|-----------|---------|--------|---------|----------|
| 1     | 21.735    | 8846626 | 184225 | 95.383  | 94.401   |
| 2     | 25.078    | 428187  | 10926  | 4.617   | 5.599    |
| Total |           | 9274812 | 195151 | 100.000 | 100.000  |

(enantiomerically enriched **3a**)

(R)-1'-(1-Hydroxypentan-3-yl)spiro[[1,3]dioxolane-2,3'-indolin]-2'-one **3b**

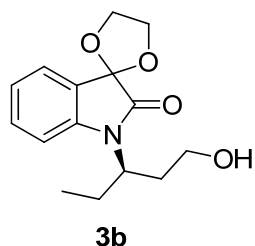

A colorless oil;  $^1\text{H}$  NMR (500 MHz,  $\text{CDCl}_3$ )  $\delta$  0.89 (t,  $J = 7.6$  Hz, 3H), 1.72-1.81 (m, 1H), 1.90-1.96 (m, 1H), 2.03-2.30 (m, 3H), 3.46-3.51 (m, 1H), 3.58-3.63 (m, 1H), 4.27-4.32 (m, 2H), 4.51-4.59 (m, 2H), 6.94 (d,  $J = 7.6$  Hz, 1H), 7.06 (t,  $J = 7.6$  Hz, 1H), 7.29-7.32 (m, 1H), 7.36 (d,  $J = 7.6$  Hz, 1H);  $^{13}\text{C}$  NMR (125 MHz,  $\text{CDCl}_3$ )  $\delta$  11.02, 24.83, 33.91, 51.02, 59.04, 65.78, 65.85, 101.76, 110.39, 123.02, 124.34, 125.01, 131.48, 174.55; The ee value was 91%,  $t_R$  (minor) = 27.60 min,  $t_R$  (major) = 22.52 min (Chiralcel ID,  $\lambda = 254$  nm, 10% iPrOH/hexanes, flow rate = 1.0 mL/min); HRMS (ESI)  $m/z$  calcd for  $\text{C}_{15}\text{H}_{19}\text{NNaO}_4$   $[\text{M}+\text{Na}]^+ = 300.1206$ , found = 300.1209;  $[\alpha]_D^{25} = 29.73$  ( $c = 1.20$ ,  $\text{CHCl}_3$ ).

<Chromatogram>

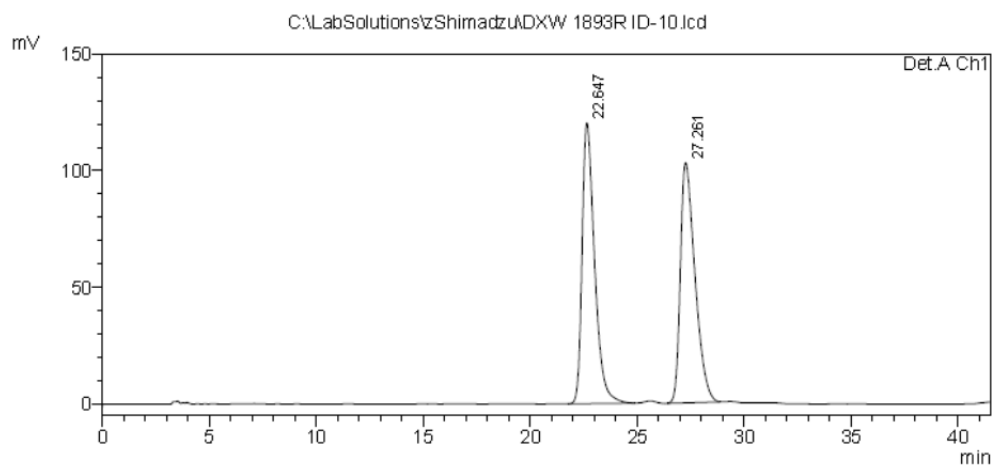

PeakTable

| Peak# | Ret. Time | Area    | Height | Area %  | Height % |
|-------|-----------|---------|--------|---------|----------|
| 1     | 22.647    | 4869693 | 120236 | 49.945  | 53.894   |
| 2     | 27.261    | 4880441 | 102860 | 50.055  | 46.106   |
| Total |           | 9750134 | 223097 | 100.000 | 100.000  |

(racemic **3b**)

<Chromatogram>

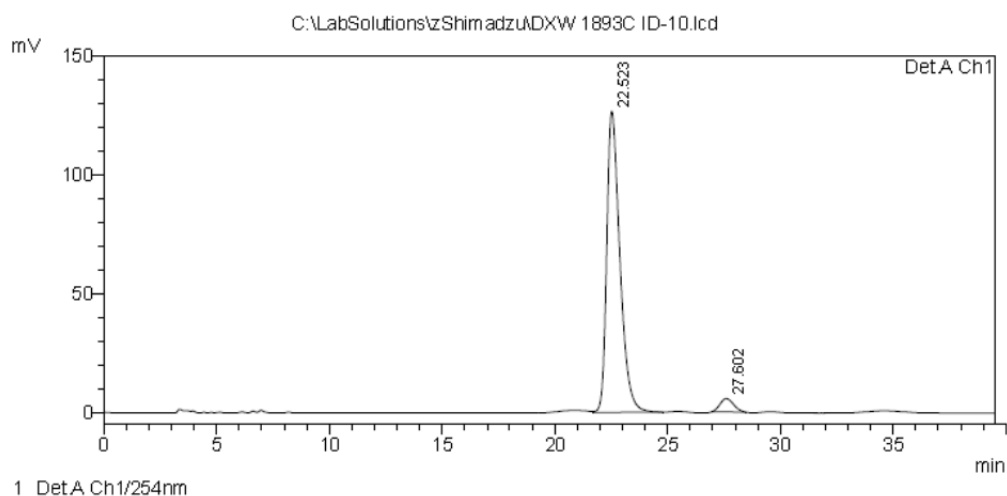

PeakTable

| Peak# | Ret. Time | Area    | Height | Area %  | Height % |
|-------|-----------|---------|--------|---------|----------|
| 1     | 22.523    | 5139413 | 126841 | 95.624  | 95.757   |
| 2     | 27.602    | 235214  | 5621   | 4.376   | 4.243    |
| Total |           | 5374627 | 132462 | 100.000 | 100.000  |

(enantiomerically enriched **3b**)

(R)-1'-(1-Hydroxyheptan-3-yl)spiro[[1,3]dioxolane-2,3'-indolin]-2'-one **3c**

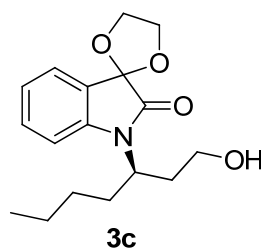

A colorless oil;  $^1\text{H}$  NMR (500 MHz,  $\text{CDCl}_3$ )  $\delta$  0.83 (t,  $J = 6.9$  Hz, 3H), 0.91 (t,  $J = 7.3$  Hz, 2H), 1.25-1.40 (m, 5H), 1.53-1.59 (m, 1H), 1.67-1.74 (m, 1H), 1.88-2.05 (m, 3H), 3.45-3.52 (m, 3H), 3.59-3.62 (m, 1H), 3.70 (t,  $J = 4.5$  Hz, 1H), 4.27-4.32 (m, 2H), 4.53-4.58 (m, 2H), 6.94 (d,  $J = 7.6$  Hz, 1H), 7.06 (t,  $J = 7.6$  Hz, 1H), 7.31 (t,  $J = 7.6$  Hz, 1H), 7.36 (d,  $J = 6.9$  Hz, 1H);  $^{13}\text{C}$  NMR (125 MHz,  $\text{CDCl}_3$ )  $\delta$  13.81, 13.84, 19.22, 22.25, 28.59, 31.40, 31.65, 34.14, 59.00, 61.78, 65.78, 65.86, 71.05, 71.68, 101.76, 110.41, 123.02, 124.38, 125.01, 131.48, 174.47; The ee value was 91%,  $t_{\text{R}}$  (minor) = 26.13 min,  $t_{\text{R}}$  (major) = 21.06 min (Chiralcel ID,  $\lambda = 254$  nm, 10% iPrOH/hexanes, flow rate = 1.0 mL/min); HRMS (ESI)  $m/z$  calcd for  $\text{C}_{17}\text{H}_{23}\text{NNaO}_4$   $[\text{M}+\text{Na}]^+ = 328.1519$ , found = 328.1532;  $[\alpha]_{\text{D}}^{25} = 2.70$  ( $c = 1.02$ ,  $\text{CHCl}_3$ ).

<Chromatogram>

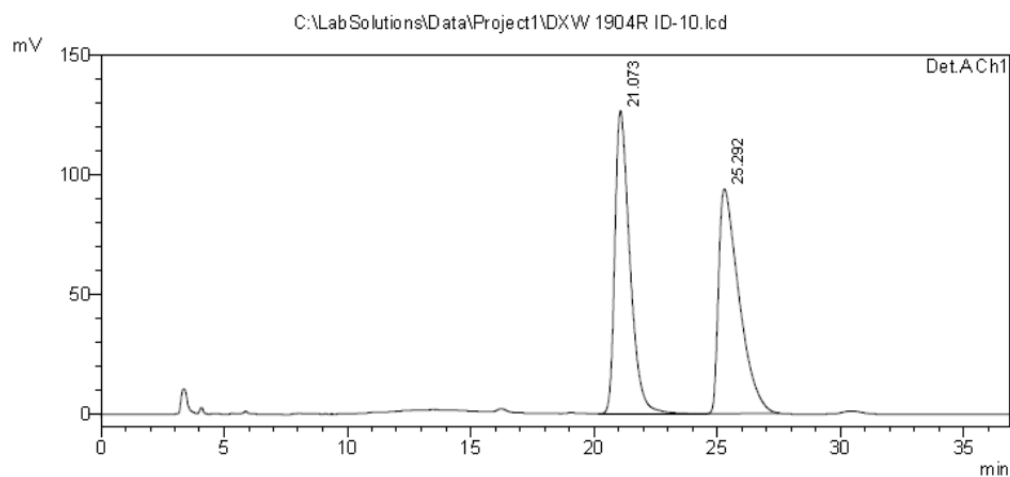

1 Det.A.Ch1/254nm

PeakTable

| Peak# | Ret. Time | Area     | Height | Area %  | Height % |
|-------|-----------|----------|--------|---------|----------|
| 1     | 21.073    | 5372212  | 126578 | 49.773  | 57.416   |
| 2     | 25.292    | 5421216  | 93878  | 50.227  | 42.584   |
| Total |           | 10793428 | 220457 | 100.000 | 100.000  |

(racemic **3c**)

<Chromatogram>

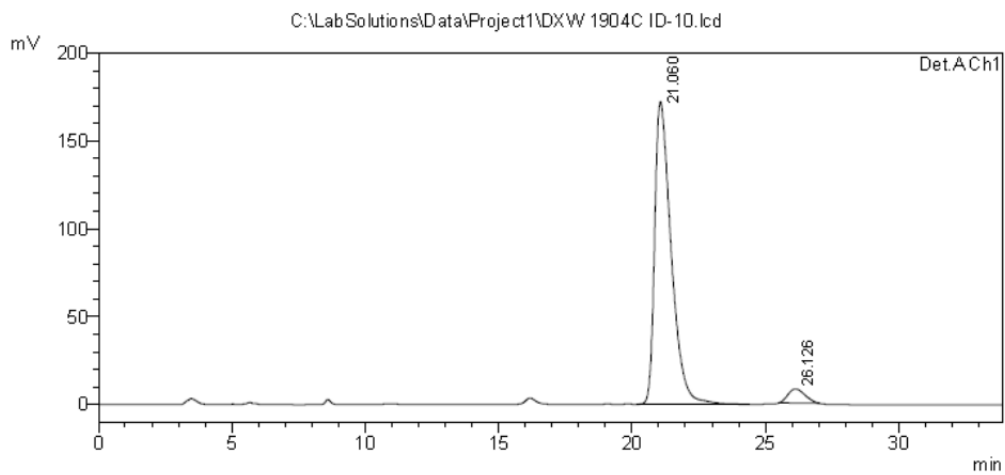

1 Det.A.Ch1/254nm

PeakTable

| Peak# | Ret. Time | Area    | Height | Area %  | Height % |
|-------|-----------|---------|--------|---------|----------|
| 1     | 21.060    | 7420483 | 172359 | 95.391  | 95.520   |
| 2     | 26.126    | 358553  | 8084   | 4.609   | 4.480    |
| Total |           | 7779036 | 180442 | 100.000 | 100.000  |

(enantiomerically enriched **3c**)

**(R)-1'-(1-Hydroxy-5-phenylpentan-3-yl)spiro[[1,3]dioxolane-2,3'-indolin]-2'-one 3d**

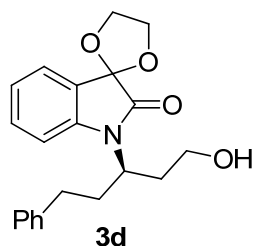

A colorless oil;  $^1\text{H}$  NMR (500 MHz,  $\text{CDCl}_3$ )  $\delta$  1.91-1.98 (m, 1H), 2.01-2.08 (m, 1H), 2.45 (br s, 1H), 2.55-2.64 (m, 2H), 3.47-3.52 (m, 1H), 3.62-3.64 (m, 1H), 4.30-4.36 (m, 2H), 4.55-4.63 (m, 2H), 6.91 (br s, 1H), 7.08-7.11 (m, 3H), 7.16 (t,  $J = 7.3$  Hz, 1H), 7.22-7.26 (m, 2H), 7.32 (t,  $J = 7.9$  Hz, 1H), 7.40 (d,  $J = 7.0$  Hz, 1H);  $^{13}\text{C}$  NMR (125 MHz,  $\text{CDCl}_3$ )  $\delta$  32.75, 33.60, 34.21, 58.99, 65.87, 65.94, 101.84, 123.21, 124.41, 125.16, 126.05, 128.42, 131.60, 140.98, 174.64; The ee value was 92%,  $t_{\text{R}}$  (minor) = 19.64 min,  $t_{\text{R}}$  (major) = 16.07 min (Chiralcel IA,  $\lambda = 254$  nm, 10% iPrOH/hexanes, flow rate = 1.0 mL/min); HRMS (ESI)  $m/z$  calcd for  $\text{C}_{21}\text{H}_{23}\text{NNaO}_4$   $[\text{M}+\text{Na}]^+ = 376.1519$ , found = 376.1531;  $[\alpha]_{\text{D}}^{25} = -4.10$  ( $c = 1.53$ ,  $\text{CHCl}_3$ ).

**<Chromatogram>**

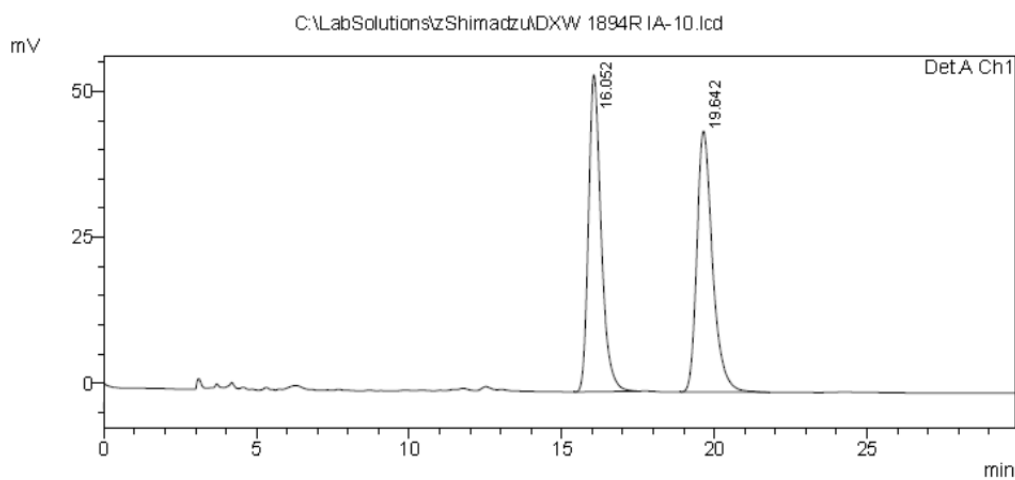

PeakTable

| Peak# | Ret. Time | Area    | Height | Area%   | Height% |
|-------|-----------|---------|--------|---------|---------|
| 1     | 16.052    | 1563898 | 54170  | 49.543  | 54.851  |
| 2     | 19.642    | 1592767 | 44588  | 50.457  | 45.149  |
| Total |           | 3156666 | 98758  | 100.000 | 100.000 |

(racemic **3d**)

<Chromatogram>

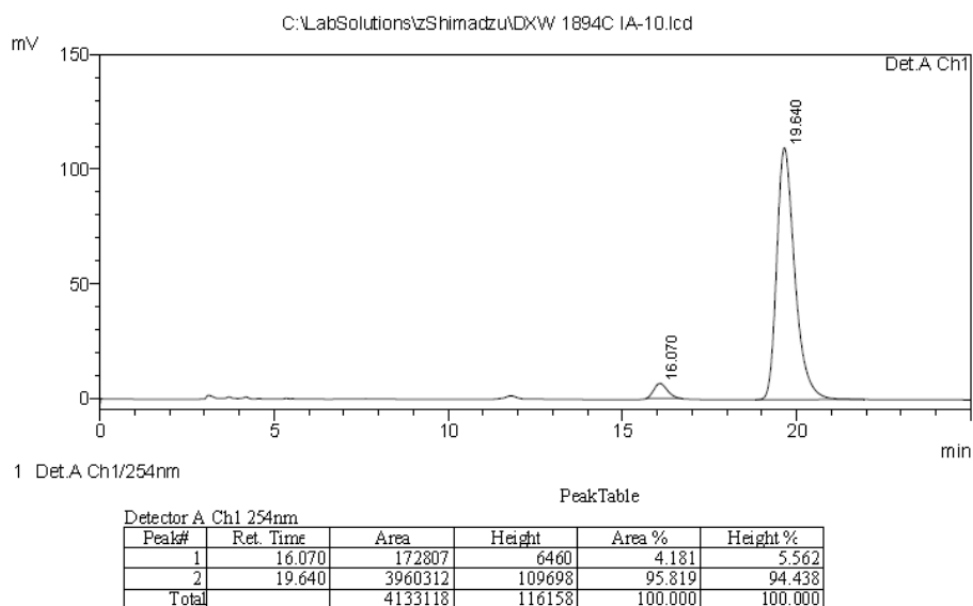

(enantiomerically enriched **3d**)

(S)-1'-(1-Cyclohexyl-3-hydroxypropyl)spiro[[1,3]dioxolane-2,3'-indolin]-2'-one **3e**

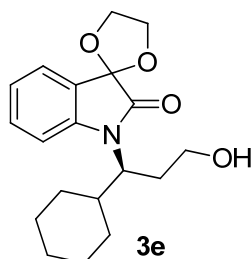

A colorless oil;  $^1\text{H}$  NMR (500 MHz,  $\text{CDCl}_3$ )  $\delta$  0.85-1.14 (m, 4H), 1.22-1.28 (m, 2H), 1.58-1.64 (m, 3H), 1.93 (s, 1H), 1.95-2.07 (m, 5H), 3.44-3.56 (m, 2H), 4.27-4.31 (m, 2H), 4.54-4.59 (m, 2H), 6.95 (br s, 1H), 7.07 (br s, 1H), 7.30-7.36 (m, 2H);  $^{13}\text{C}$  NMR (125 MHz,  $\text{CDCl}_3$ )  $\delta$  13.90, 19.28, 25.70, 25.89, 26.15, 29.69, 30.82, 30.87, 31.72, 38.36,

53.70, 59.25, 61.84, 65.84, 65.95, 71.10, 71.73, 101.79, 111.23, 123.20, 124.42, 125.08, 131.54, 142.65, 174.84; The ee value was 95%,  $t_R$  (minor) = 34.48 min,  $t_R$  (major) = 27.24 min (Chiralcel ID,  $\lambda$  = 254 nm, 10% iPrOH/hexanes, flow rate = 1.0 mL/min); HRMS (ESI) m/z calcd for  $\text{C}_{19}\text{H}_{25}\text{NNaO}_4$   $[\text{M}+\text{Na}]^+$  = 354.1676, found = 354.1687;  $[\alpha]_D^{25}$  = -3.51 (c = 1.13,  $\text{CHCl}_3$ ).



<Chromatogram>

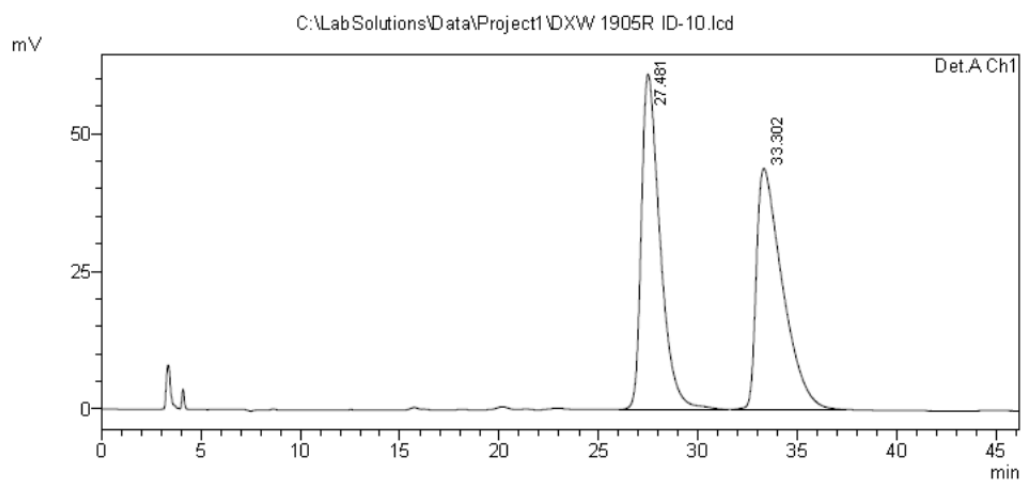

PeakTable

| Peak# | Ret. Time | Area    | Height | Area %  | Height % |
|-------|-----------|---------|--------|---------|----------|
| 1     | 27.481    | 3996137 | 60874  | 50.079  | 58.187   |
| 2     | 33.302    | 3983505 | 43744  | 49.921  | 41.813   |
| Total |           | 7979641 | 104619 | 100.000 | 100.000  |

(racemic **3e**)

<Chromatogram>

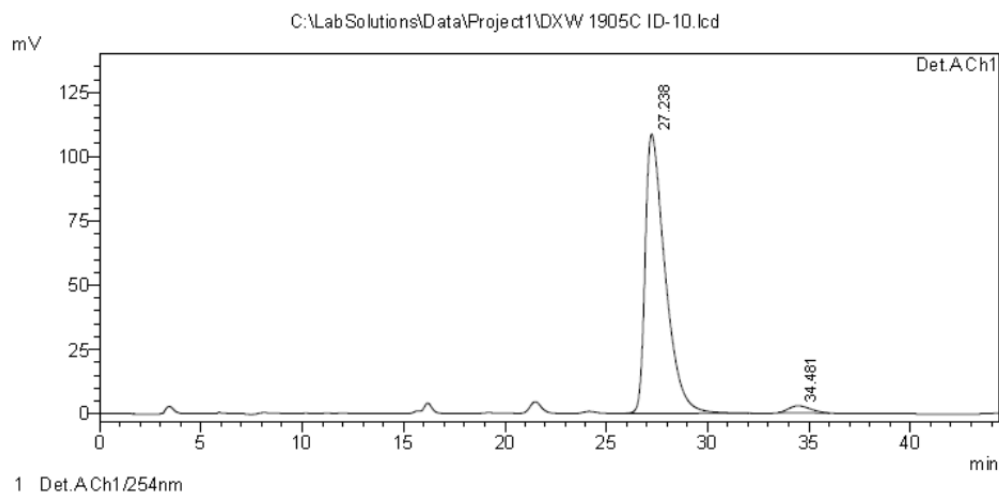

PeakTable

| Peak# | Ret. Time | Area    | Height | Area %  | Height % |
|-------|-----------|---------|--------|---------|----------|
| 1     | 27.238    | 7444564 | 108671 | 97.337  | 97.559   |
| 2     | 34.481    | 203688  | 2719   | 2.663   | 2.441    |
| Total |           | 7648252 | 111390 | 100.000 | 100.000  |

(enantiomerically enriched **3e**)

(R)-5'-Chloro-1'-(1-hydroxyhexan-3-yl)spiro[[1,3]dioxolane-2,3'-indolin]-2'-one **3f**

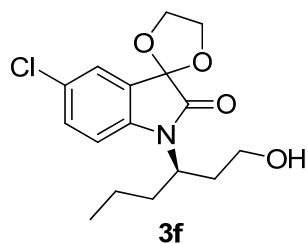

A colorless oil;  $^1\text{H}$  NMR (500 MHz,  $\text{CDCl}_3$ )  $\delta$  0.88 (t,  $J = 7.3$  Hz, 3H), 1.25-1.32 (m, 2H), 1.62-1.70 (m, 1H), 1.87-1.94 (m, 1H), 2.03 (br s, 2H), 3.46-3.50 (m, 1H), 3.62 (t,  $J = 5.8$  Hz, 1H), 4.27-4.32 (m, 2H), 4.52-4.57 (m, 2H), 6.88 (d,  $J = 8.2$  Hz, 1H), 7.26-7.29 (m, 1H), 7.33 (d,  $J = 1.9$  Hz, 1H);  $^{13}\text{C}$  NMR (125 MHz,  $\text{CDCl}_3$ )  $\delta$  13.65, 19.71, 33.72, 34.04, 58.97, 65.96, 66.03, 101.34, 125.58, 126.18, 128.57, 131.29, 174.04; The ee value was 89%,  $t_R$  (minor) = 18.33 min,  $t_R$  (major) = 15.31 min (Chiralcel ID,  $\lambda = 254$  nm, 10% iPrOH/hexanes, flow rate = 1.0 mL/min); HRMS (ESI)  $m/z$  calcd for  $\text{C}_{16}\text{H}_{20}\text{ClNNaO}_4$   $[\text{M}+\text{Na}]^+ = 348.0973$ , found = 348.0980;  $[\alpha]_D^{25} = 0.22$  ( $c = 1.30$ ,  $\text{CHCl}_3$ ).

<Chromatogram>

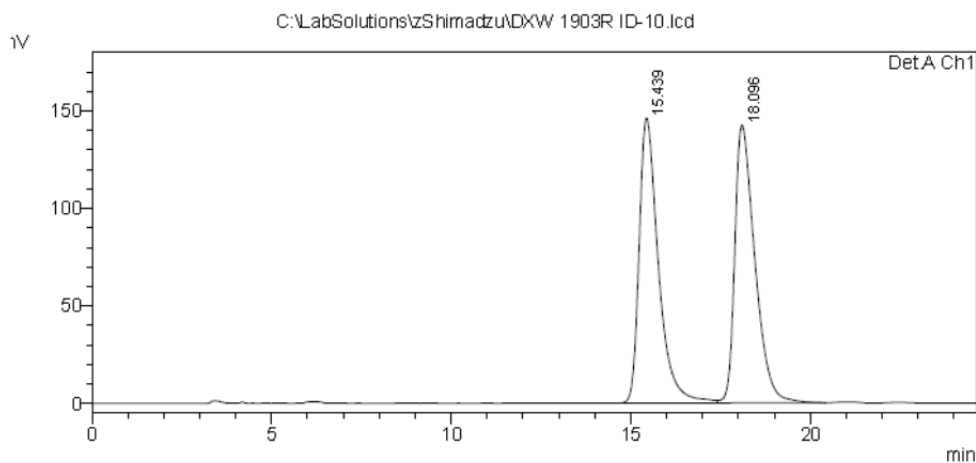

Det.A Ch1/254nm

PeakTable

| Peak# | Ret. Time | Area     | Height | Area %  | Height % |
|-------|-----------|----------|--------|---------|----------|
| 1     | 15.439    | 5450106  | 146219 | 49.636  | 50.634   |
| 2     | 18.096    | 5530027  | 142557 | 50.364  | 49.366   |
| Total |           | 10980134 | 288776 | 100.000 | 100.000  |

(racemic **3f**)

<Chromatogram>

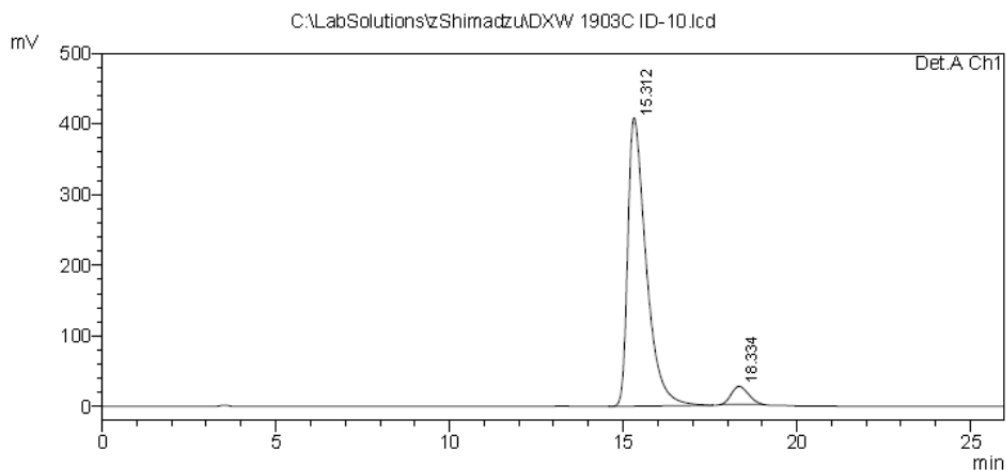

(enantiomerically enriched **3f**)

(R)-5'-Fluoro-1'-(1-hydroxyhexan-3-yl)spiro[[1,3]dioxolane-2,3'-indolin]-2'-one **3g**

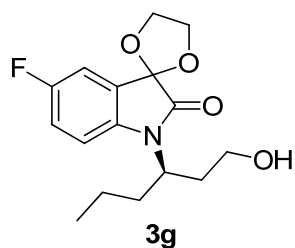

A colorless oil;  $^1\text{H}$  NMR (500 MHz,  $\text{CDCl}_3$ )  $\delta$  0.88 (t,  $J = 7.3$  Hz, 3H), 1.24-1.33 (m, 2H), 1.62-1.69 (m, 1H), 1.87-1.94 (m, 1H), 2.03 (br s, 2H), 3.45-3.50 (m, 1H), 3.61 (t,  $J = 5.7$  Hz, 1H), 4.27-4.31 (m, 2H), 4.52-4.57 (m, 2H), 6.88 (dd,  $J = 3.8$  Hz, 8.8 Hz, 1H), 6.99-7.03 (m, 1H), 7.09 (dd,  $J = 2.9$  Hz, 7.3 Hz, 1H);  $^{13}\text{C}$  NMR (125 MHz,  $\text{CDCl}_3$ )  $\delta$  13.65, 19.70, 33.72, 34.05, 58.97, 65.92, 65.99, 101.40, 111.23, 112.98, 113.18, 117.61, 117.80, 126.16, 158.21, 160.15, 174.34; The ee value was 91%,  $t_{\text{R}}$  (minor) = 20.62 min,  $t_{\text{R}}$  (major) = 17.77 min (Chiralcel ID,  $\lambda = 254$  nm, 10% iPrOH/hexanes, flow rate = 1.0 mL/min); HRMS (ESI)  $m/z$  calcd for  $\text{C}_{16}\text{H}_{20}\text{FNNaO}_4$   $[\text{M}+\text{Na}]^+$  = 332.1269, found = 332.1274;  $[\alpha]_{\text{D}}^{25} = 0.97$  ( $c = 1.17$ ,  $\text{CHCl}_3$ ).

<Chromatogram>

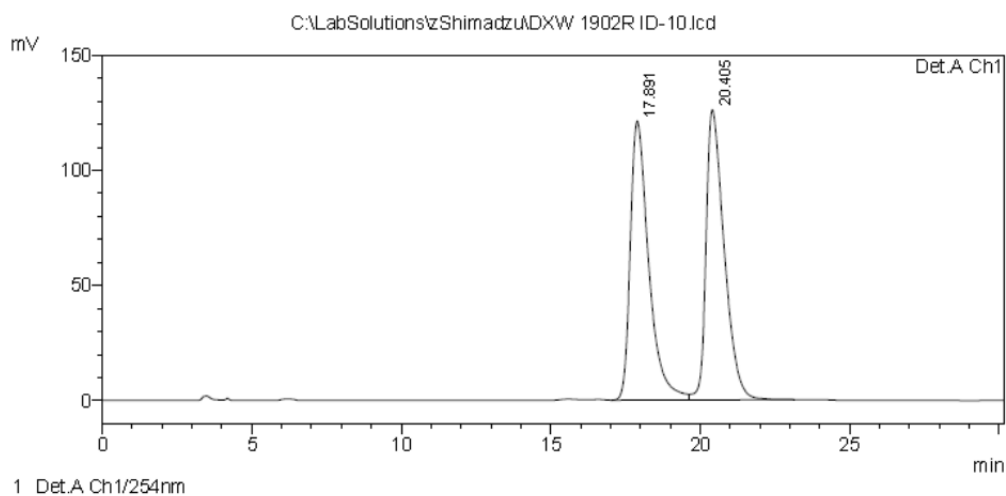

PeakTable

| Peak# | Ret. Time | Area     | Height | Area %  | Height % |
|-------|-----------|----------|--------|---------|----------|
| 1     | 17.891    | 5208066  | 121297 | 49.466  | 49.015   |
| 2     | 20.405    | 5320617  | 126173 | 50.534  | 50.985   |
| Total |           | 10528683 | 247471 | 100.000 | 100.000  |

(racemic **3g**)

<Chromatogram>

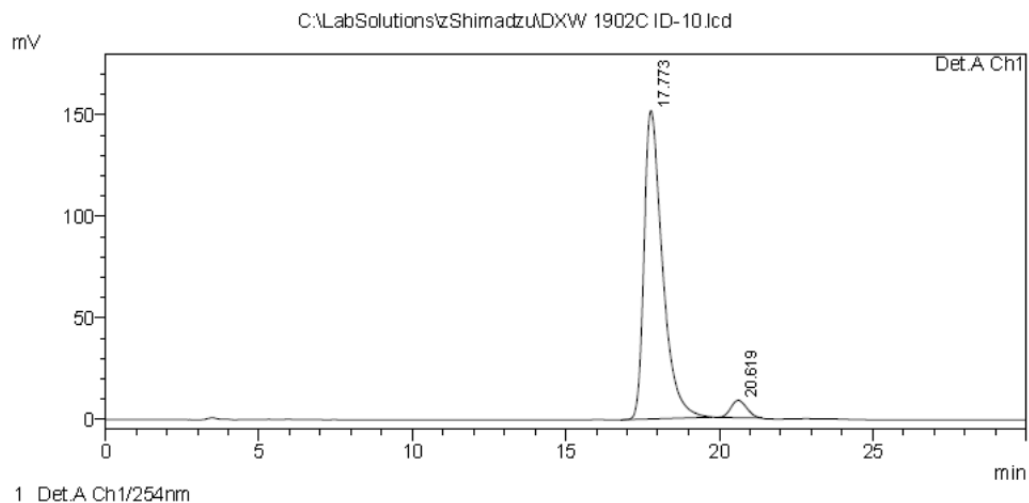

PeakTable

| Peak# | Ret. Time | Area    | Height | Area %  | Height % |
|-------|-----------|---------|--------|---------|----------|
| 1     | 17.773    | 6334024 | 151709 | 95.342  | 94.676   |
| 2     | 20.619    | 309426  | 8532   | 4.658   | 5.324    |
| Total |           | 6643450 | 160241 | 100.000 | 100.000  |

(enantiomerically enriched **3g**)

(R)-1'-(1-Hydroxyhexan-3-yl)-5'-methoxyspiro[[1,3]dioxolane-2,3'-indolin]-2'-one **3h**

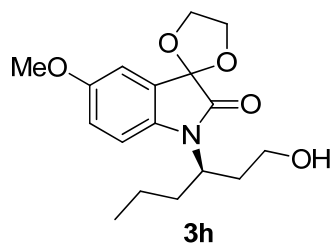

A colorless oil;  $^1\text{H}$  NMR (500 MHz,  $\text{CDCl}_3$ )  $\delta$  0.88 (t,  $J = 7.3$  Hz, 3H), 1.28-1.33 (m, 2H), 1.62-1.69 (m, 1H), 1.88-1.93 (m, 1H), 2.03 (br s, 2H), 3.46-3.50 (m, 1H), 3.58-3.62 (m, 1H), 3.78 (s, 3H), 4.28-4.31 (m, 2H), 4.54-4.59 (m, 2H), 6.85 (dd,  $J = 8.8$  Hz, 16.4 Hz, 2H), 6.97 (s, 1H);  $^{13}\text{C}$  NMR (125 MHz,  $\text{CDCl}_3$ )  $\delta$  13.69, 19.74, 33.83, 34.18, 55.79, 59.02, 65.85, 65.93, 101.96, 111.44, 116.59, 125.60, 156.19, 174.44; The ee value was 92%,  $t_R$  (minor) = 16.10 min,  $t_R$  (major) = 17.75 min (Chiralcel IA,  $\lambda = 254$  nm, 10% iPrOH/hexanes, flow rate = 1.0 mL/min); HRMS (ESI)  $m/z$  calcd for  $\text{C}_{17}\text{H}_{23}\text{NNaO}_5$   $[\text{M}+\text{Na}]^+ = 344.1468$ , found = 344.1477;  $[\alpha]_D^{25} = 4.16$  ( $c = 1.13$ ,  $\text{CHCl}_3$ ).

<Chromatogram>

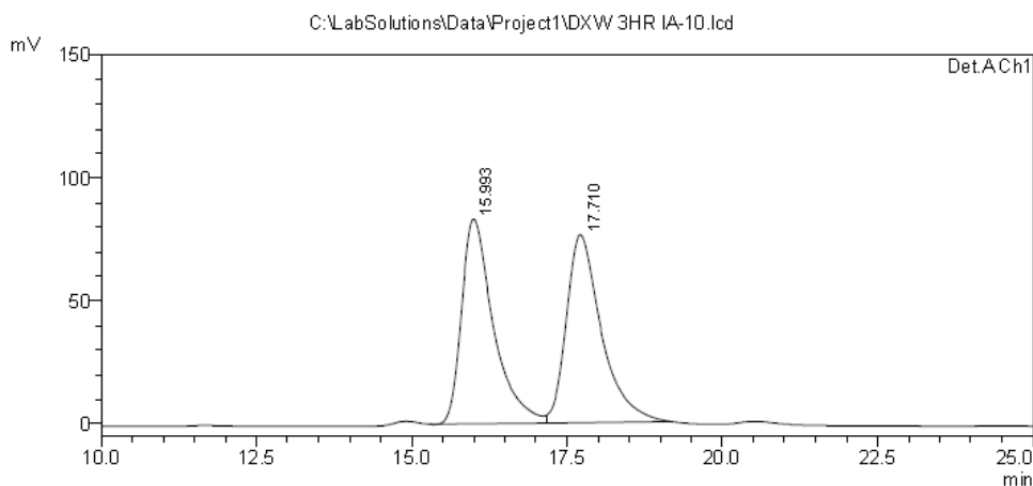

PeakTable

| Peak# | Ret. Time | Area    | Height | Area %  | Height % |
|-------|-----------|---------|--------|---------|----------|
| 1     | 15.993    | 2973796 | 83351  | 49.822  | 52.153   |
| 2     | 17.710    | 2995023 | 76470  | 50.178  | 47.847   |
| Total |           | 5968819 | 159821 | 100.000 | 100.000  |

(racemic **3h**)

<Chromatogram>

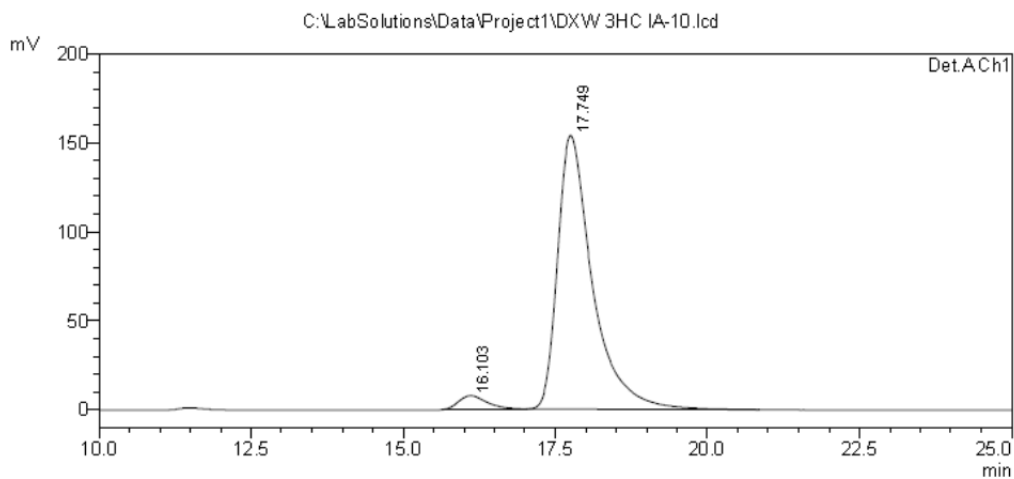

PeakTable

| Peak# | Ret. Time | Area    | Height | Area %  | Height % |
|-------|-----------|---------|--------|---------|----------|
| 1     | 16.103    | 253763  | 7713   | 3.976   | 4.775    |
| 2     | 17.749    | 6127811 | 153803 | 96.024  | 95.225   |
| Total |           | 6381574 | 161516 | 100.000 | 100.000  |

(enantiomerically enriched **3h**)

(R)-1'-(1-Hydroxyhexan-3-yl)-5'-methylspiro[[1,3]dioxolane-2,3'-indolin]-2'-one **3i**

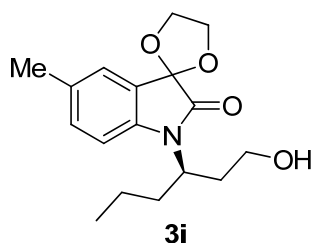

A colorless oil;  $^1\text{H}$  NMR (500 MHz,  $\text{CDCl}_3$ )  $\delta$  0.88 (t,  $J = 7.3$  Hz, 3H), 1.29-1.33 (m, 2H), 1.63-1.70 (m, 1H), 1.88-1.94 (m, 1H), 2.06 (br s, 2H), 2.30 (s, 3H), 3.46-3.51 (m, 1H), 3.59-3.62 (m, 1H), 3.78 (s, 3H), 4.28-4.31 (m, 2H), 4.54-4.59 (m, 2H), 6.84 (d,  $J = 7.6$  Hz, 1H), 7.11 (d,  $J = 7.6$  Hz, 1H), 7.20 (s, 1H);  $^{13}\text{C}$  NMR (125 MHz,  $\text{CDCl}_3$ )  $\delta$  13.69, 19.76, 20.77, 33.82, 34.17, 59.05, 65.82, 65.91, 101.96, 124.37, 125.77, 131.76, 132.82, 174.55; The ee value was 92%,  $t_R$  (minor) = 23.09 min,  $t_R$  (major) = 24.81 min (Chiralcel IA,  $\lambda = 254$  nm, 5% iPrOH/hexanes, flow rate = 1.0 mL/min); HRMS (ESI)  $m/z$  calcd for  $\text{C}_{17}\text{H}_{23}\text{NNaO}_4$   $[\text{M}+\text{Na}]^+ = 328.1519$ , found = 328.1527;  $[\alpha]_D^{25} = 4.51$  ( $c = 1.13$ ,  $\text{CHCl}_3$ ).

<Chromatogram>

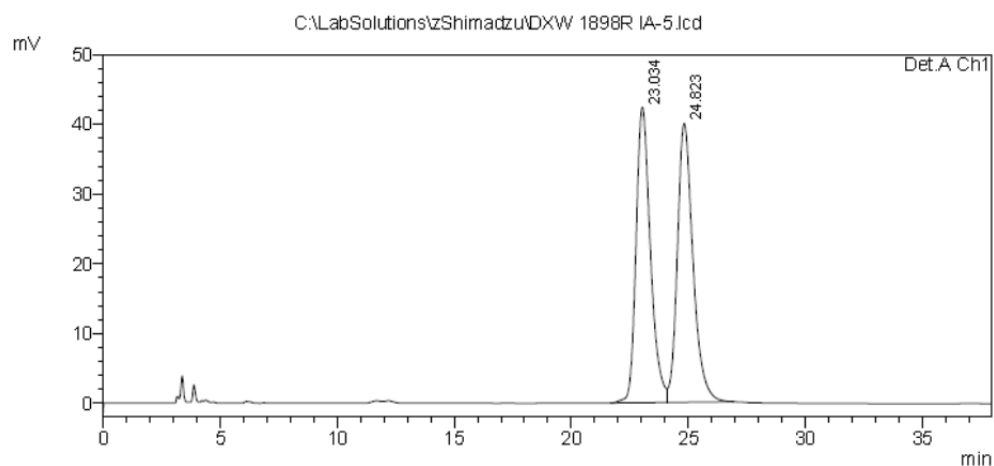

PeakTable

| Peak# | Ret. Time | Area    | Height | Area %  | Height % |
|-------|-----------|---------|--------|---------|----------|
| 1     | 23.034    | 1809938 | 42357  | 49.377  | 51.458   |
| 2     | 24.823    | 1855598 | 39957  | 50.623  | 48.542   |
| Total |           | 3665535 | 82314  | 100.000 | 100.000  |

(racemic **3i**)

<Chromatogram>

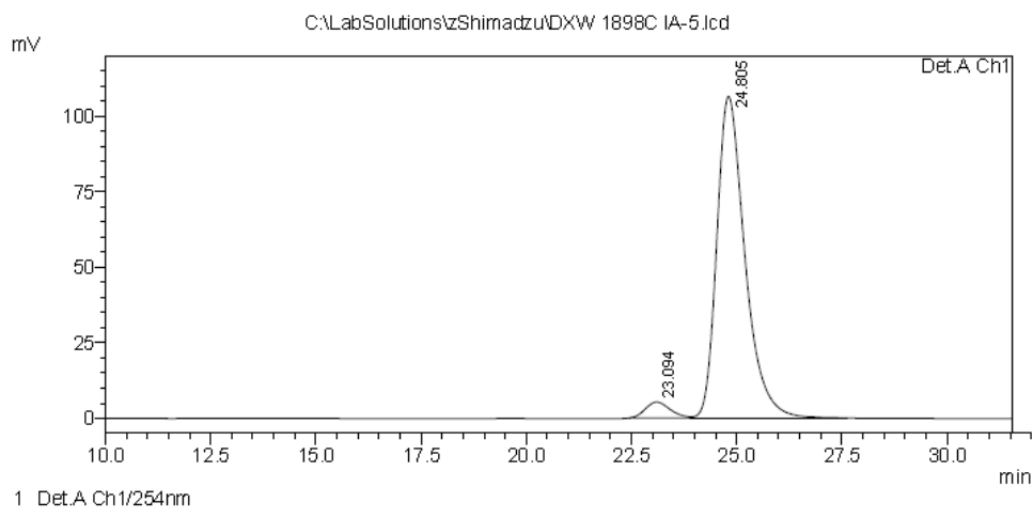

PeakTable

| Peak# | Ret. Time | Area    | Height | Area %  | Height % |
|-------|-----------|---------|--------|---------|----------|
| 1     | 23.094    | 212580  | 5241   | 4.112   | 4.695    |
| 2     | 24.805    | 4957434 | 106384 | 95.888  | 95.305   |
| Total |           | 5170014 | 111626 | 100.000 | 100.000  |

(enantiomerically enriched **3i**)

(R)-1-(1-Hydroxyhexan-3-yl)indoline-2,3-dione 5a

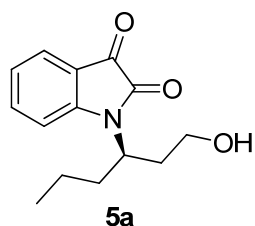

A red oil;  $^1\text{H}$  NMR (500 MHz,  $\text{CDCl}_3$ )  $\delta$  0.86 (t,  $J = 7.6$  Hz, 3H), 1.24-1.32 (m, 2H), 1.65-1.72 (m, 1H), 1.91-1.98 (m, 1H), 2.04 (br s, 1H), 2.19 (br s, 1H), 2.53 (br s, 1H), 3.51-3.55 (m, 1H), 3.62-3.65 (m, 1H), 4.38 (br s, 1H), 7.04 (t,  $J = 8.5$  Hz, 1H), 7.50-7.54 (m, 2H);  $^{13}\text{C}$  NMR (125 MHz,  $\text{CDCl}_3$ )  $\delta$  13.54, 19.68, 33.71, 34.10, 50.46, 59.00, 111.47, 117.59, 123.31, 125.36, 138.28, 158.57, 183.44; HRMS (ESI)  $m/z$  calcd for  $\text{C}_{14}\text{H}_{16}\text{NO}_3$   $[\text{M}-\text{H}]^- = 246.1136$ , found = 246.1138.

(R)-3-(1H-Indol-1-yl)hexan-1-ol 6a

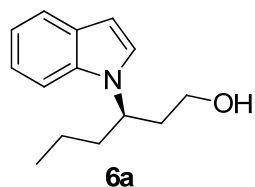

A colorless oil;  $^1\text{H}$  NMR (500 MHz,  $\text{CDCl}_3$ )  $\delta$  0.87 (t,  $J = 7.6$  Hz, 3H), 1.09-1.16 (m, 1H), 1.19-1.26 (m, 1H), 1.79-1.86 (m, 1H), 1.90-1.98 (m, 1H), 2.01-2.13 (m, 2H), 3.22-3.25 (m, 1H), 3.47-3.51 (m, 1H), 4.57-4.63 (m, 1H), 6.57 (d,  $J = 3.2$  Hz, 1H), 7.09-7.15 (m, 2H), 7.20 (t,  $J = 7.6$  Hz, 1H), 7.43 (d,  $J = 8.2$  Hz, 1H), 7.63 (d,  $J = 8.2$  Hz, 1H);  $^{13}\text{C}$  NMR (125 MHz,  $\text{CDCl}_3$ )  $\delta$  13.84, 19.55, 38.11, 38.42, 52.47, 59.28, 101.95, 109.56, 119.28, 120.99, 121.39, 124.30, 128.28, 136.74; The ee value was 91%,  $t_{\text{R}}$  (minor) = 6.87 min,  $t_{\text{R}}$  (major) = 7.82 min (Chiralcel ID,  $\lambda = 254$  nm, 5% iPrOH/hexanes, flow rate = 1.0 mL/min); HRMS (ESI)  $m/z$  calcd for  $\text{C}_{14}\text{H}_{20}\text{NO}$   $[\text{M}+\text{H}]^+ = 218.1539$ , found = 218.1536;  $[\alpha]_{\text{D}}^{25} = -10.93$  ( $c = 1.00$ ,  $\text{CHCl}_3$ ).



<Chromatogram>

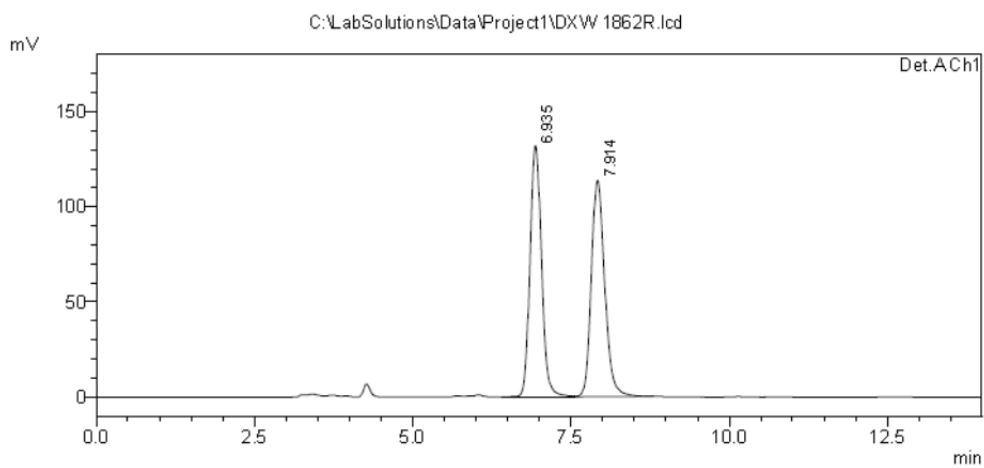

PeakTable

| Peak# | Ret. Time | Area    | Height | Area %  | Height % |
|-------|-----------|---------|--------|---------|----------|
| 1     | 6.935     | 1677794 | 131796 | 49.967  | 53.700   |
| 2     | 7.914     | 1680017 | 113635 | 50.033  | 46.300   |
| Total |           | 3357811 | 245431 | 100.000 | 100.000  |

(racemic **6a**)

<Chromatogram>

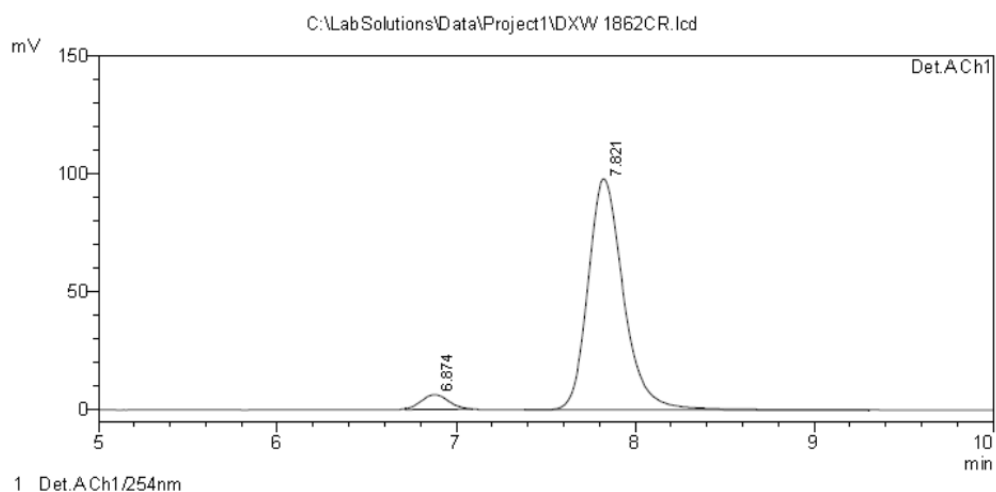

PeakTable

| Peak# | Ret. Time | Area    | Height | Area %  | Height % |
|-------|-----------|---------|--------|---------|----------|
| 1     | 6.874     | 65464   | 6202   | 4.624   | 5.949    |
| 2     | 7.821     | 1350414 | 98053  | 95.376  | 94.051   |
| Total |           | 1415878 | 104255 | 100.000 | 100.000  |

(enantiomerically enriched **6a**)

(R)-3-(1H-Indol-1-yl)pentan-1-ol **6b**

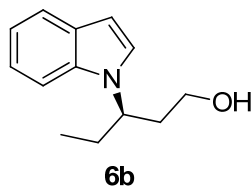

A colorless oil;  $^1\text{H}$  NMR (500 MHz,  $\text{CDCl}_3$ )  $\delta$  0.79 (t,  $J = 7.3$  Hz, 3H), 1.90-1.97 (m, 2H), 2.02-2.16 (m, 2H), 3.24-3.29 (m, 1H), 3.49-3.54 (m, 1H), 4.47-4.53 (m, 1H), 6.57 (d,  $J = 3.2$  Hz, 1H), 7.10 (t,  $J = 6.9$  Hz, 1H), 7.14-7.21 (m, 2H), 7.43 (d,  $J = 8.2$  Hz, 1H), 7.63 (d,  $J = 8.2$  Hz, 1H);  $^{13}\text{C}$  NMR (125 MHz,  $\text{CDCl}_3$ )  $\delta$  10.94, 29.01, 38.08, 54.39, 59.33, 101.95, 109.57, 119.28, 120.98, 121.37, 124.28, 128.32, 136.82; The ee value was 91%,  $t_R$  (minor) = 7.83 min,  $t_R$  (major) = 7.35 min (Chiralcel IC,  $\lambda = 254$  nm, 10% iPrOH/hexanes, flow rate = 1.0 mL/min); HRMS (ESI)  $m/z$  calcd for  $\text{C}_{13}\text{H}_{18}\text{NO}$   $[\text{M}+\text{H}]^+ = 204.1383$ , found = 204.1373;  $[\alpha]_D^{25} = -0.37$  ( $c = 1.30$ ,  $\text{CHCl}_3$ ).

<Chromatogram>

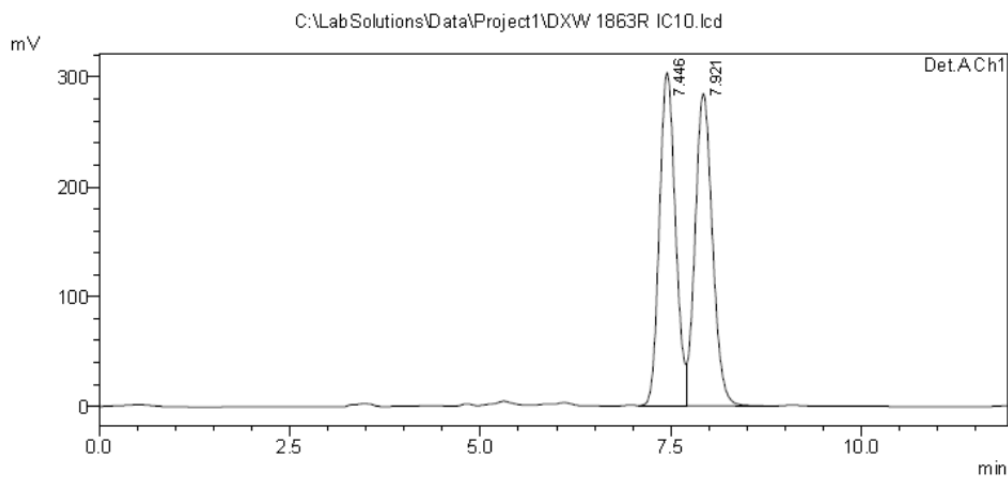

PeakTable

| Peak# | Ret. Time | Area    | Height | Area %  | Height % |
|-------|-----------|---------|--------|---------|----------|
| 1     | 7.446     | 4439947 | 303422 | 49.609  | 51.627   |
| 2     | 7.921     | 4510023 | 284295 | 50.391  | 48.373   |
| Total |           | 8949970 | 587717 | 100.000 | 100.000  |

(racemic **6b**)

<Chromatogram>

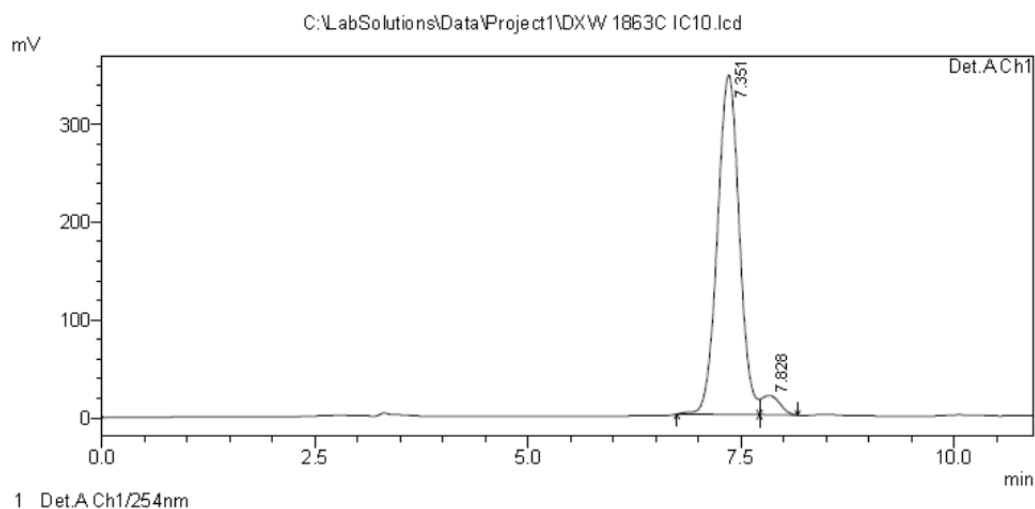

PeakTable

| Peak# | Ret. Time | Area    | Height | Area %  | Height % |
|-------|-----------|---------|--------|---------|----------|
| 1     | 7.351     | 6234808 | 347606 | 95.444  | 94.546   |
| 2     | 7.828     | 297640  | 20054  | 4.556   | 5.454    |
| Total |           | 6532449 | 367659 | 100.000 | 100.000  |

(enantiomerically enriched **6b**)

(R)-3-(1H-Indol-1-yl)heptan-1-ol **6c**

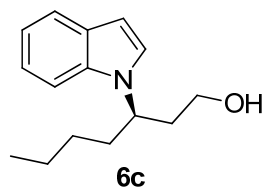

A colorless oil;  $^1\text{H}$  NMR (500 MHz,  $\text{CDCl}_3$ )  $\delta$  0.82 (t,  $J = 7.3$  Hz, 3H), 1.03-1.11 (m, 1H), 1.18-1.35 (m, 4H), 1.83-1.98 (m, 2H), 2.01-2.14 (m, 2H), 3.22-3.27 (m, 1H), 3.47-3.52 (m, 1H), 4.55-4.61 (m, 1H), 6.56 (d,  $J = 3.2$  Hz, 1H), 7.10 (t,  $J = 7.6$  Hz, 1H), 7.15 (d,  $J = 8.2$  Hz, 1H), 7.20 (t,  $J = 7.6$  Hz, 1H), 7.42 (d,  $J = 8.2$  Hz, 1H), 7.64 (d,  $J = 7.6$  Hz, 1H);  $^{13}\text{C}$  NMR (125 MHz,  $\text{CDCl}_3$ )  $\delta$  13.84, 22.39, 28.40, 35.59, 38.41, 52.75, 59.26, 101.90, 109.50, 119.22, 120.92, 121.34, 124.23, 128.25, 136.67; The ee value was 91%,  $t_R$  (minor) = 13.91 min,  $t_R$  (major) = 18.25 min (Chiralcel ID,  $\lambda = 254$  nm, 1% iPrOH/hexanes, flow rate = 1.0 mL/min); HRMS (ESI)  $m/z$  calcd for  $\text{C}_{15}\text{H}_{22}\text{NO}$   $[\text{M}+\text{H}]^+ = 232.1696$ , found = 232.1703;  $[\alpha]_D^{25} = -9.91$  ( $c = 1.10$ ,  $\text{CHCl}_3$ ).

**<Chromatogram>**

mV

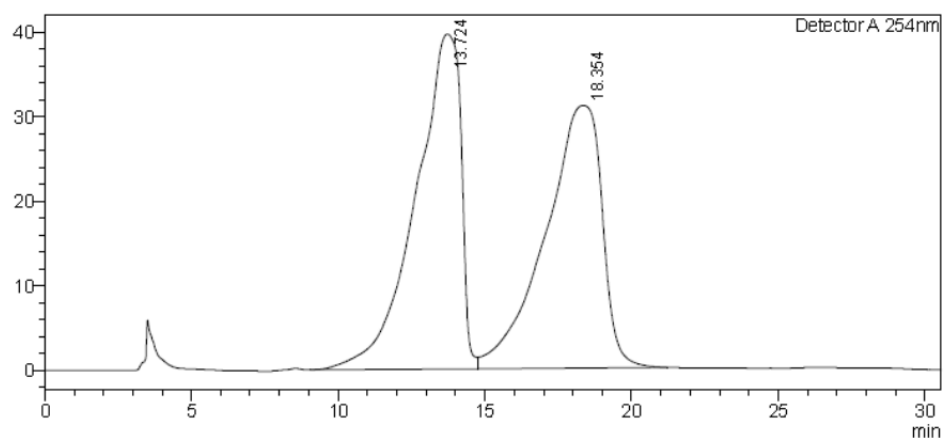**<Peak Table>**

| Detector A 254nm |           |         |        |        |      |      |      |
|------------------|-----------|---------|--------|--------|------|------|------|
| Peak#            | Ret. Time | Area    | Height | Conc.  | Unit | Mark | Name |
| 1                | 13.724    | 4262365 | 39586  | 50.421 |      |      |      |
| 2                | 18.354    | 4191183 | 31060  | 49.579 |      | V    |      |
| Total            |           | 8453548 | 70646  |        |      |      |      |

(racemic **6c**)**<Chromatogram>**

uV

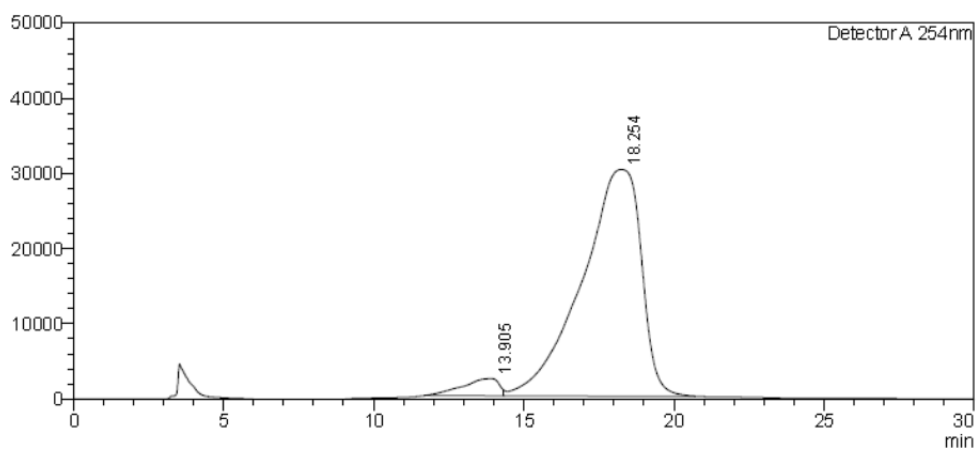**<Peak Table>**

| Detector A 254nm |           |         |        |        |      |      |      |
|------------------|-----------|---------|--------|--------|------|------|------|
| Peak#            | Ret. Time | Area    | Height | Conc.  | Unit | Mark | Name |
| 1                | 13.905    | 192898  | 2287   | 4.439  |      | M    |      |
| 2                | 18.254    | 4152642 | 30150  | 95.581 |      | V M  |      |
| Total            |           | 4345540 | 32438  |        |      |      |      |

(enantiomerically enriched **6c**)

(R)-3-(1H-Indol-1-yl)-5-phenylpentan-1-ol **6d**

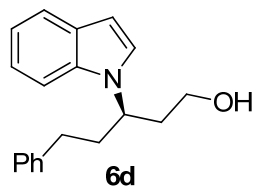

A colorless oil;  $^1\text{H}$  NMR (500 MHz,  $\text{CDCl}_3$ )  $\delta$  2.05-2.11 (m, 2H), 2.17-2.24 (m, 1H), 2.28-2.35 (m, 1H), 2.41-2.52 (m, 1H), 3.19-3.24 (m, 1H), 3.45-3.49 (m, 1H), 4.57-4.63 (m, 1H), 6.63 (d,  $J = 3.2$  Hz, 1H), 7.07 (d,  $J = 6.9$  Hz, 2H), 7.13-7.29 (m, 6H), 7.37 (d,  $J = 8.2$  Hz, 1H), 7.68 (d,  $J = 7.6$  Hz, 1H);  $^{13}\text{C}$  NMR (125 MHz,  $\text{CDCl}_3$ )  $\delta$  32.38, 37.51, 38.40, 52.09, 59.08, 102.26, 109.66, 119.35, 120.97, 121.41, 124.13, 125.96, 128.35, 128.37, 136.64, 141.10; The ee value was 91%,  $t_R$  (minor) = 14.79 min,  $t_R$  (major) = 23.89 min (Chiralcel ID,  $\lambda = 254$  nm, 2% iPrOH/hexanes, flow rate = 1.0 mL/min); HRMS (ESI)  $m/z$  calcd for  $\text{C}_{19}\text{H}_{22}\text{NO}$   $[\text{M}+\text{H}]^+$  = 280.1696, found = 280.1700;  $[\alpha]_D^{25} = -22.60$  ( $c = 1.00$ ,  $\text{CHCl}_3$ ).

<Chromatogram>

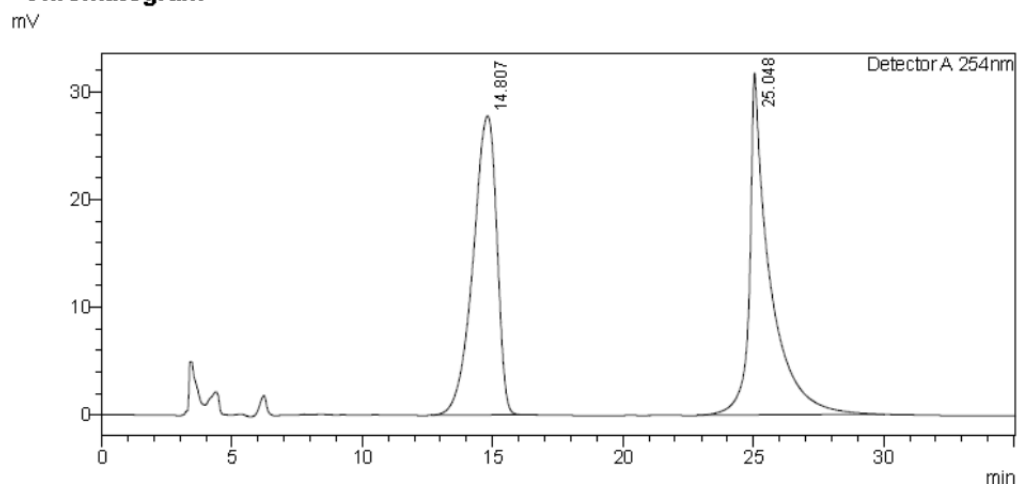

<Peak Table>

| Detector A 254nm |           |         |        |        |      |      |      |
|------------------|-----------|---------|--------|--------|------|------|------|
| Peak#            | Ret. Time | Area    | Height | Conc.  | Unit | Mark | Name |
| 1                | 14.807    | 1761261 | 27754  | 50.764 |      |      |      |
| 2                | 25.048    | 1708217 | 31735  | 49.236 |      |      |      |
| Total            |           | 3469478 | 59489  |        |      |      |      |

(racemic **6d**)

<Chromatogram>

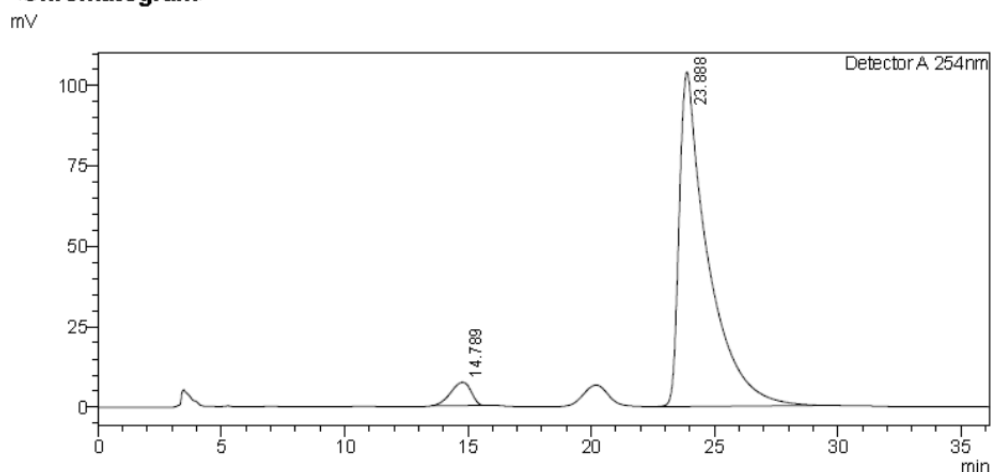

<Peak Table>

| Peak# | Ret. Time | Area    | Height | Conc.  | Unit | Mark | Name |
|-------|-----------|---------|--------|--------|------|------|------|
| 1     | 14.789    | 415861  | 7234   | 4.730  |      | M    |      |
| 2     | 23.888    | 8376827 | 104037 | 95.270 |      |      |      |
| Total |           | 8792688 | 111271 |        |      |      |      |

(enantiomerically enriched **6d**)

(S)-3-Cyclohexyl-3-(1H-indol-1-yl)propan-1-ol **6e**

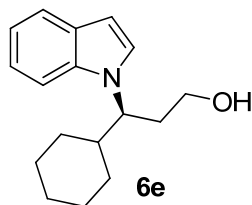

A colorless oil;  $^1\text{H}$  NMR (500 MHz,  $\text{CDCl}_3$ )  $\delta$  0.84-0.91 (m, 1H), 1.02-1.13 (m, 3H), 1.21-1.31 (m, 3H), 1.59-1.62 (m, 2H), 1.78-1.80 (m, 2H), 1.95-2.04 (m, 2H), 2.24-2.30 (m, 2H), 3.13-3.18 (m, 1H), 3.43-3.47 (m, 1H), 4.26-4.31 (m, 1H), 6.56 (d,  $J = 3.2$  Hz, 1H), 7.08-7.11 (m, 2H), 7.19 (t,  $J = 7.6$  Hz, 1H), 7.40 (d,  $J = 8.2$  Hz, 1H), 7.63 (d,  $J = 8.2$  Hz, 1H);  $^{13}\text{C}$  NMR (125 MHz,  $\text{CDCl}_3$ )  $\delta$  25.96, 26.11, 26.27, 29.79, 30.74, 34.76, 43.38, 59.46, 101.78, 109.74, 119.24, 120.94, 121.38, 124.74, 128.11, 137.09; The ee value was 94%,  $t_{\text{R}}$  (minor) = 24.67 min,  $t_{\text{R}}$  (major) = 31.33 min (Chiralcel IA,  $\lambda = 254$  nm, 1.2% iPrOH/hexanes, flow rate = 1.0 mL/min); HRMS (ESI)  $m/z$  calcd for  $\text{C}_{17}\text{H}_{24}\text{NO}$   $[\text{M}+\text{H}]^+$  = 258.1852, found = 258.1863;  $[\alpha]_{\text{D}}^{25} = -30.90$  ( $c = 1.00$ ,  $\text{CHCl}_3$ ).

### <Chromatogram>

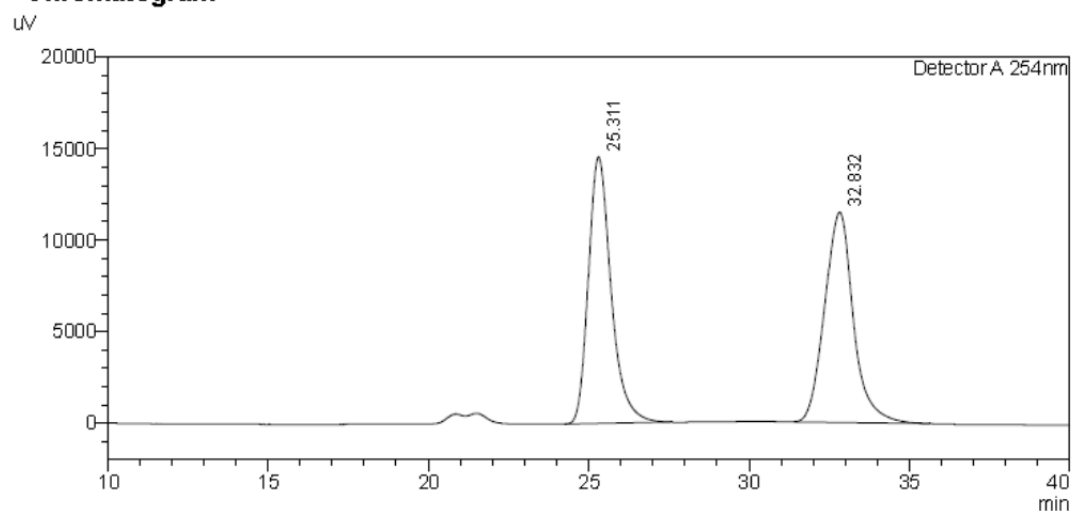

### <Peak Table>

Detector A 254nm

| Peak# | Ret. Time | Area    | Height | Conc.  | Unit | Mark | Name |
|-------|-----------|---------|--------|--------|------|------|------|
| 1     | 25.311    | 718394  | 14584  | 50.036 |      |      |      |
| 2     | 32.832    | 717369  | 11498  | 49.964 |      |      |      |
| Total |           | 1435763 | 26082  |        |      |      |      |

(racemic **6e**)

### <Chromatogram>

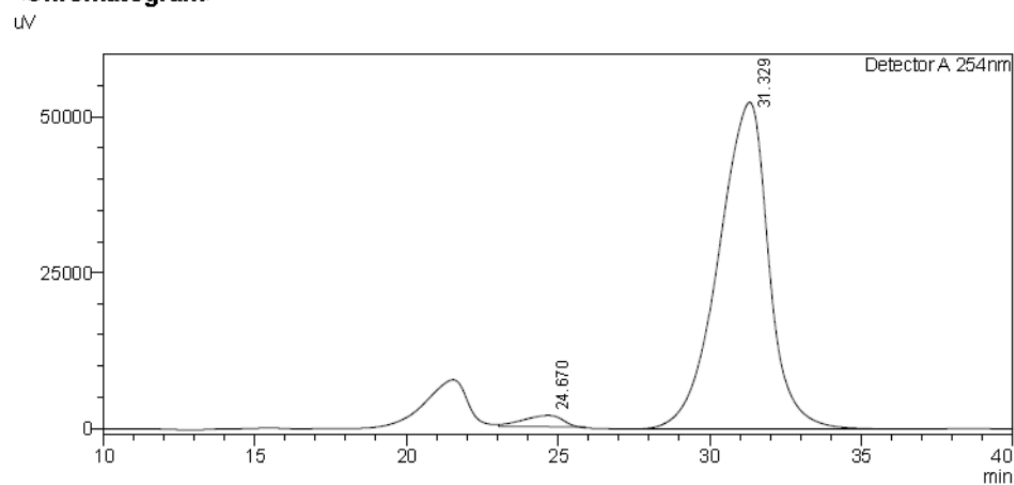

### <Peak Table>

Detector A 254nm

| Peak# | Ret. Time | Area    | Height | Conc.  | Unit | Mark | Name |
|-------|-----------|---------|--------|--------|------|------|------|
| 1     | 24.670    | 164346  | 1814   | 2.644  |      | M    |      |
| 2     | 31.329    | 6052072 | 52405  | 97.356 |      |      |      |
| Total |           | 6216419 | 54219  |        |      |      |      |

(enantiomerically enriched **6e**)

(R)-3-(5-Chloro-1H-indol-1-yl)hexan-1-ol 6f

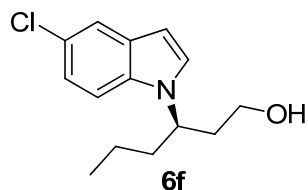

A colorless oil;  $^1\text{H}$  NMR (500 MHz,  $\text{CDCl}_3$ )  $\delta$  0.85 (t,  $J = 7.6$  Hz, 3H), 1.05-1.09 (m, 1H), 1.10-1.23 (m, 1H), 1.53 (br s, 1H), 1.78-1.85 (m, 1H), 1.87-1.95 (m, 1H), 1.98-2.12 (m, 2H), 3.19-3.24 (m, 1H), 3.49-3.53 (m, 1H), 4.53-4.59 (m, 1H), 6.49 (d,  $J = 3.2$  Hz, 1H), 7.12-7.15 (m, 2H), 7.33 (d,  $J = 8.1$  Hz, 1H), 7.58 (d,  $J = 1.9$  Hz, 1H);  $^{13}\text{C}$  NMR (125 MHz,  $\text{CDCl}_3$ )  $\delta$  13.72, 19.45, 37.97, 38.31, 52.71, 59.05, 101.61, 110.52, 120.23, 121.65, 124.86, 125.54, 129.12, 135.12; The ee value was 89%,  $t_r$  (minor) = 16.73 min,  $t_r$  (major) = 21.15 min (Chiralcel IB,  $\lambda = 254$  nm, 2% iPrOH/hexanes, flow rate = 1.0 mL/min); HRMS (ESI)  $m/z$  calcd for  $\text{C}_{14}\text{H}_{19}\text{ClNO}$   $[\text{M}+\text{H}]^+ = 252.1150$ , found = 252.1156;  $[\alpha]_D^{25} = -20.11$  ( $c = 0.55$ ,  $\text{CHCl}_3$ ).

<Chromatogram>

uV

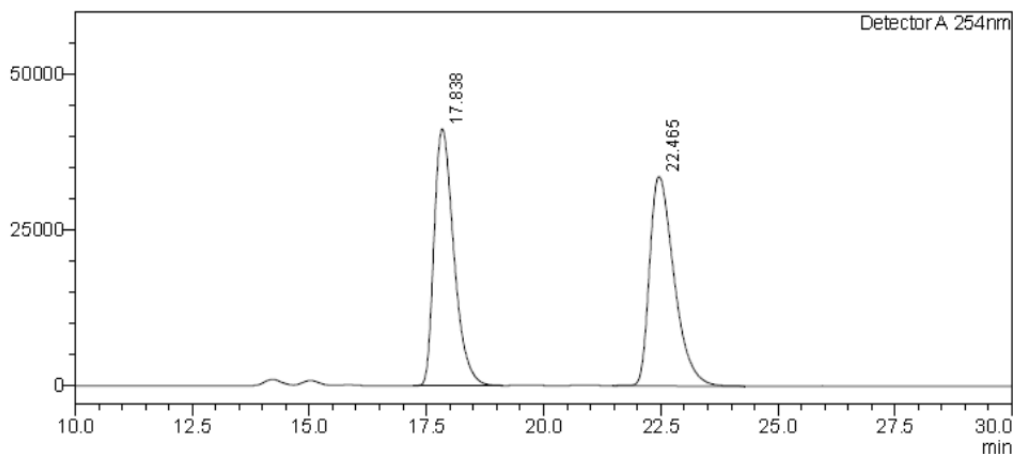

<Peak Table>

| Detector A 254nm |           |         |        |        |      |      |      |
|------------------|-----------|---------|--------|--------|------|------|------|
| Peak#            | Ret. Time | Area    | Height | Conc.  | Unit | Mark | Name |
| 1                | 17.838    | 1215433 | 41268  | 49.827 |      |      |      |
| 2                | 22.465    | 1223889 | 33663  | 50.173 |      |      |      |
| Total            |           | 2439322 | 74931  |        |      |      |      |

(racemic 6f)



**<Chromatogram>**

mV

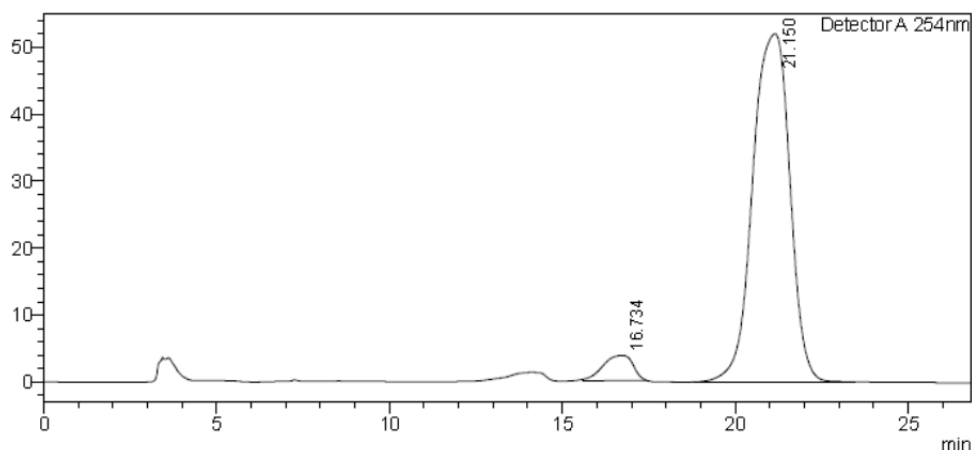**<Peak Table>**

| Detector A 254nm |           |         |        |        |      |      |      |
|------------------|-----------|---------|--------|--------|------|------|------|
| Peak#            | Ret. Time | Area    | Height | Conc.  | Unit | Mark | Name |
| 1                | 16.734    | 225664  | 3752   | 5.487  |      | M    |      |
| 2                | 21.150    | 3887223 | 52085  | 94.513 |      |      |      |
| Total            |           | 4112887 | 55837  |        |      |      |      |

(enantiomerically enriched **6f**)**(R)-3-(5-Fluoro-1H-indol-1-yl)hexan-1-ol 6g**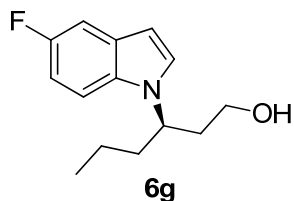

A colorless oil;  $^1\text{H}$  NMR (500 MHz,  $\text{CDCl}_3$ )  $\delta$  0.86 (t,  $J = 7.3$  Hz, 3H), 1.06-1.13 (m, 1H), 1.15-1.24 (m, 1H), 1.78-1.85 (m, 1H), 1.87-1.95 (m, 1H), 1.99-2.13 (m, 2H), 3.22-3.27 (m, 1H), 3.51-3.55 (m, 1H), 4.53-4.59 (m, 1H), 6.50 (d,  $J = 3.2$  Hz, 1H), 6.91-6.95 (m, 1H), 7.17 (d,  $J = 3.2$  Hz, 1H), 7.25 (dd,  $J = 2.6$  Hz, 9.5 Hz, 1H), 7.33 (dd,  $J = 4.4$  Hz, 8.9 Hz, 1H);  $^{13}\text{C}$  NMR (125 MHz,  $\text{CDCl}_3$ )  $\delta$  13.75, 19.48, 38.02, 38.37, 52.76, 59.16, 101.82, 101.85, 105.40, 105.58, 109.65, 109.86, 110.00, 110.08, 125.81, 128.26, 128.34, 133.34, 156.71, 158.57; The ee value was 90%,  $t_R$  (minor) = 8.77 min,  $t_R$  (major) = 9.54 min (Chiralcel IC,  $\lambda = 254$  nm, 10% iPrOH/hexanes, flow rate = 1.0 mL/min); HRMS (ESI)  $m/z$  calcd for  $\text{C}_{14}\text{H}_{19}\text{FNO}$   $[\text{M}+\text{H}]^+ = 236.1445$ , found = 236.1453;  $[\alpha]_D^{25} = -4.29$  ( $c = 0.70$ ,  $\text{CHCl}_3$ ).

<Chromatogram>

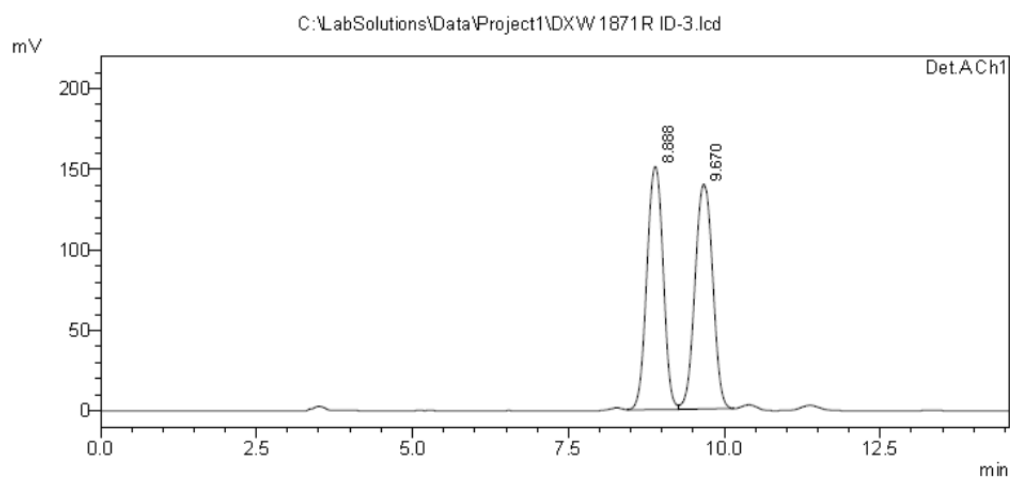

1 Det.ACh1/254nm

PeakTable

| Peak# | Ret. Time | Area    | Height | Area %  | Height % |
|-------|-----------|---------|--------|---------|----------|
| 1     | 8.888     | 2750285 | 150713 | 50.337  | 51.959   |
| 2     | 9.670     | 2713477 | 139346 | 49.663  | 48.041   |
| Total |           | 5463762 | 290059 | 100.000 | 100.000  |

(racemic **6g**)

<Chromatogram>

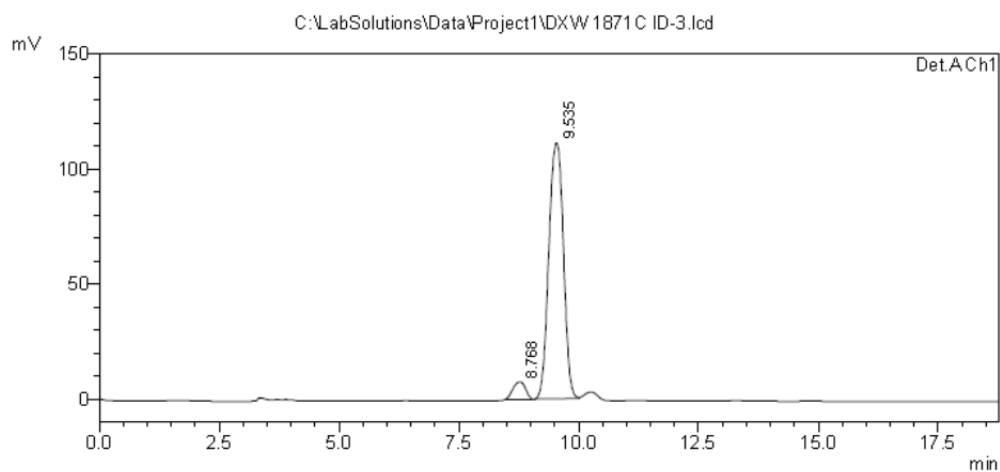

1 Det.ACh1/254nm

PeakTable

| Peak# | Ret. Time | Area    | Height | Area %  | Height % |
|-------|-----------|---------|--------|---------|----------|
| 1     | 8.768     | 132378  | 7416   | 5.321   | 6.243    |
| 2     | 9.535     | 2355425 | 111383 | 94.679  | 93.757   |
| Total |           | 2487803 | 118799 | 100.000 | 100.000  |

(enantiomerically enriched **6g**)

(R)-3-(5-Methoxy-1H-indol-1-yl)hexan-1-ol 6h

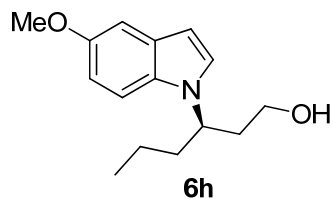

A colorless oil;  $^1\text{H}$  NMR (500 MHz,  $\text{CDCl}_3$ )  $\delta$  0.85 (t,  $J = 7.3$  Hz, 3H), 1.05-1.17 (m, 1H), 1.18-1.26 (m, 1H), 1.77-1.83 (m, 1H), 1.88-1.96 (m, 1H), 2.01-2.12 (m, 2H), 3.23-3.28 (m, 1H), 3.49-3.54 (m, 1H), 3.85 (s, 3H), 4.50-4.56 (m, 1H), 6.47 (d,  $J = 3.2$  Hz, 1H), 6.85 (dd,  $J = 2.2$  Hz, 9.1 Hz, 1H), 7.09 (dd,  $J = 2.8$  Hz, 11.0 Hz, 1H), 7.31 (d,  $J = 8.0$  Hz, 1H);  $^{13}\text{C}$  NMR (125 MHz,  $\text{CDCl}_3$ )  $\delta$  13.79, 19.50, 38.05, 38.39, 52.71, 55.79, 59.30, 101.37, 102.41, 110.24, 111.74, 124.87, 131.97, 153.81; The ee value was 92%,  $t_R$  (minor) = 13.66 min,  $t_R$  (major) = 15.27 min (Chiralcel ID,  $\lambda = 254$  nm, 5% iPrOH/hexanes, flow rate = 1.0 mL/min); HRMS (ESI)  $m/z$  calcd for  $\text{C}_{15}\text{H}_{22}\text{NO}_2$   $[\text{M}+\text{H}]^+$  = 248.1645, found = 248.1653;  $[\alpha]_D^{25} = -5.66$  ( $c = 0.50$ ,  $\text{CHCl}_3$ ).

<Chromatogram>

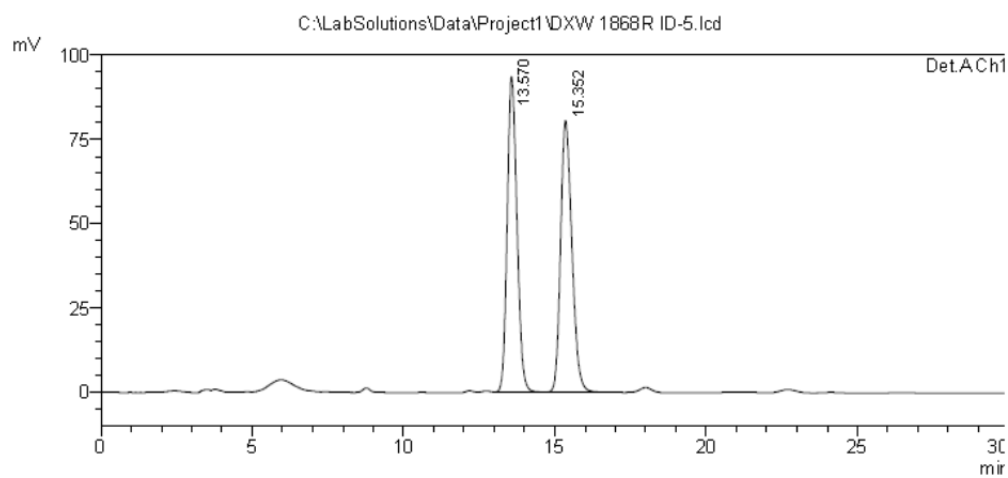

PeakTable

| Peak# | Ret. Time | Area    | Height | Area%   | Height% |
|-------|-----------|---------|--------|---------|---------|
| 1     | 13.570    | 2101636 | 93630  | 49.988  | 53.701  |
| 2     | 15.352    | 2102667 | 80724  | 50.012  | 46.299  |
| Total |           | 4204302 | 174354 | 100.000 | 100.000 |

(racemic 6h)

<Chromatogram>

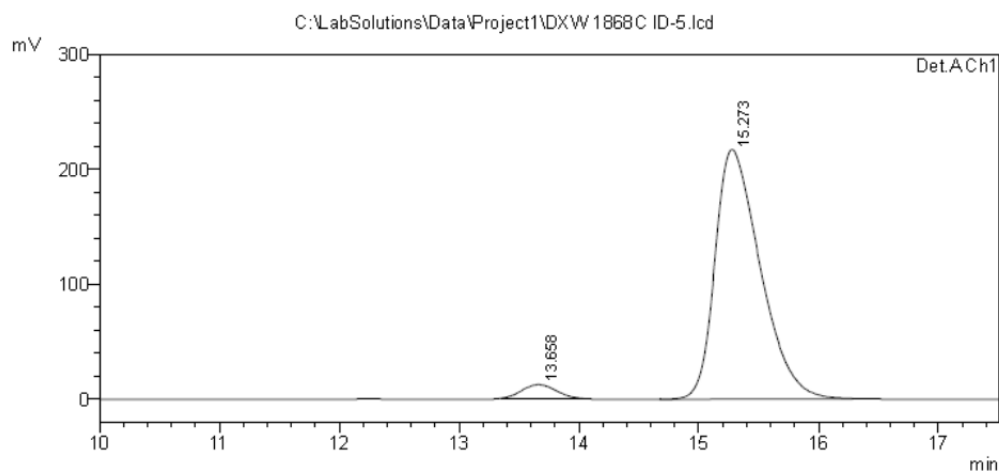

PeakTable

| Peak# | Ret. Time | Area    | Height | Area %  | Height % |
|-------|-----------|---------|--------|---------|----------|
| 1     | 13.658    | 236023  | 11985  | 3.964   | 5.221    |
| 2     | 15.273    | 5717447 | 217574 | 96.036  | 94.779   |
| Total |           | 5953470 | 229559 | 100.000 | 100.000  |

(enantiomerically enriched **6h**)

(R)-3-(5-Methyl-1H-indol-1-yl)hexan-1-ol **6i**

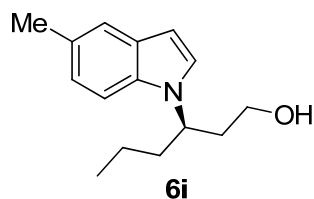

A colorless oil;  $^1\text{H}$  NMR (500 MHz,  $\text{CDCl}_3$ )  $\delta$  0.86 (t,  $J = 7.3$  Hz, 3H), 1.08-1.16 (m, 1H), 1.18-1.25 (m, 1H), 1.77-1.84 (m, 1H), 1.89-1.97 (m, 1H), 2.01-2.13 (m, 2H), 2.45 (s, 3H), 3.23-3.28 (m, 1H), 3.49-3.53 (m, 1H), 4.53-4.59 (m, 1H), 6.47 (d,  $J = 2.6$  Hz, 1H), 7.02 (t,  $J = 5.1$  Hz, 1H), 7.10 (d,  $J = 8.2$  Hz, 1H), 7.32 (d,  $J = 8.8$  Hz, 1H), 7.42 (s, 1H);  $^{13}\text{C}$  NMR (125 MHz,  $\text{CDCl}_3$ )  $\delta$  13.76, 19.48, 21.28, 38.05, 38.37, 52.55, 59.32, 101.31, 109.17, 120.59, 122.97, 124.36, 128.41, 128.51, 135.06; The ee value was 92%,  $t_{\text{R}}$  (minor) = 13.69 min,  $t_{\text{R}}$  (major) = 19.44 min (Chiralcel ID,  $\lambda = 254$  nm, 1% iPrOH/hexanes, flow rate = 1.0 mL/min); HRMS (ESI)  $m/z$  calcd for  $\text{C}_{15}\text{H}_{22}\text{NO}$   $[\text{M}+\text{H}]^+$  = 232.1696, found = 232.1702;  $[\alpha]_{\text{D}}^{25} = -4.08$  ( $c = 0.60$ ,  $\text{CHCl}_3$ ).

<Chromatogram>

mV

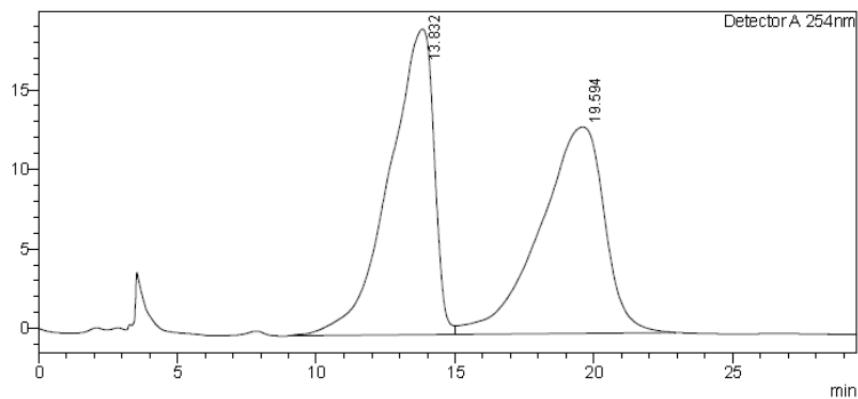

<Peak Table>

| Detector A 254nm |           |         |        |        |      |      |      |
|------------------|-----------|---------|--------|--------|------|------|------|
| Peak#            | Ret. Time | Area    | Height | Conc.  | Unit | Mark | Name |
| 1                | 13.832    | 2155388 | 19204  | 50.666 |      |      |      |
| 2                | 19.594    | 2088744 | 12964  | 49.334 |      | V    |      |
| Total            |           | 4254132 | 32168  |        |      |      |      |

(racemic **6i**)

<Chromatogram>

uV

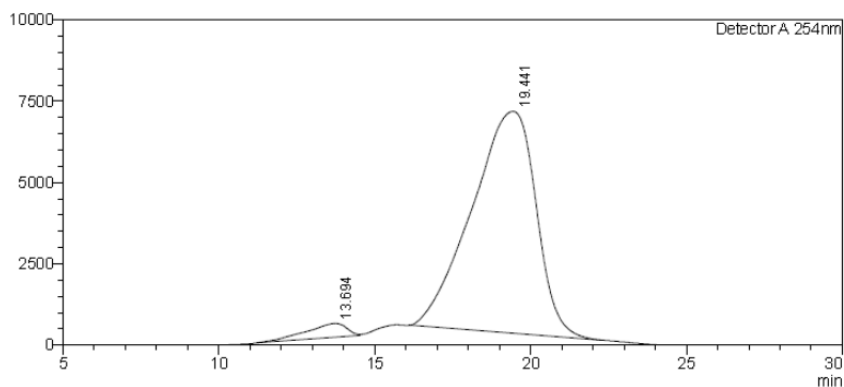

<Peak Table>

| Detector A 254nm |           |         |        |        |      |      |      |
|------------------|-----------|---------|--------|--------|------|------|------|
| Peak#            | Ret. Time | Area    | Height | Conc.  | Unit | Mark | Name |
| 1                | 13.694    | 39167   | 421    | 3.847  |      | M    |      |
| 2                | 19.441    | 978913  | 6831   | 96.153 |      |      |      |
| Total            |           | 1018080 | 7251   |        |      |      |      |

(enantiomerically enriched **6i**)

Reference

[1] W.-B. Liu, X. Zhang, L.-X. Dai, S.-L. You, *Angew. Chem. Int. Ed.* **2012**, *51*, 5183.

## E. NMR Spectra of the Substrates and Products.

<sup>1</sup>H AMX500 dxw0311-1 1796H

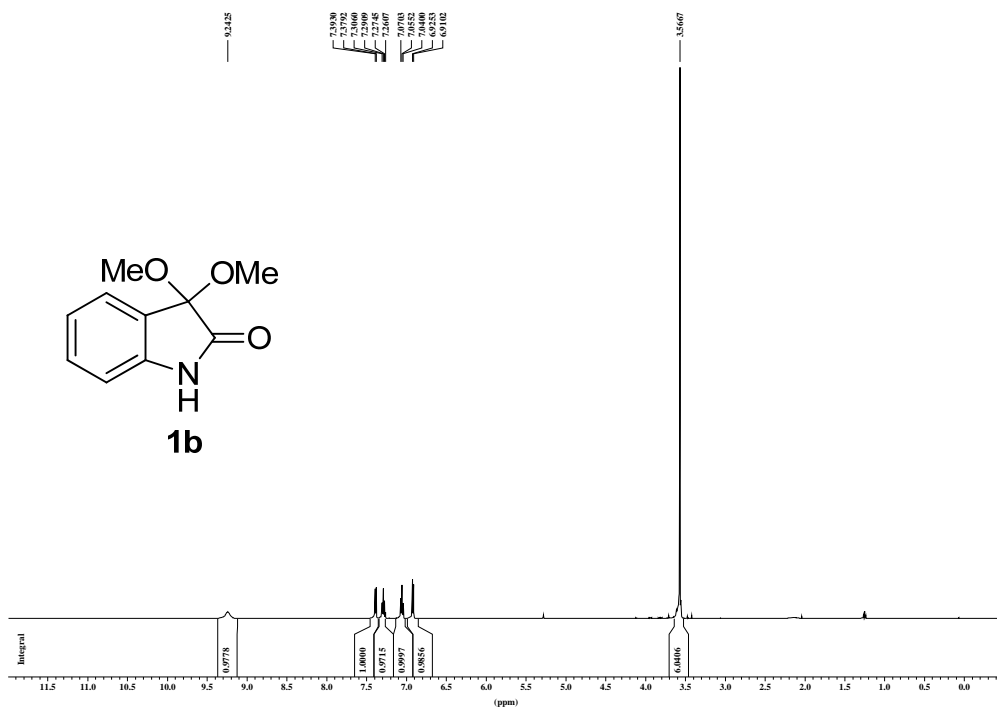

<sup>13</sup>C AMX500 dxw0311-2 1796C

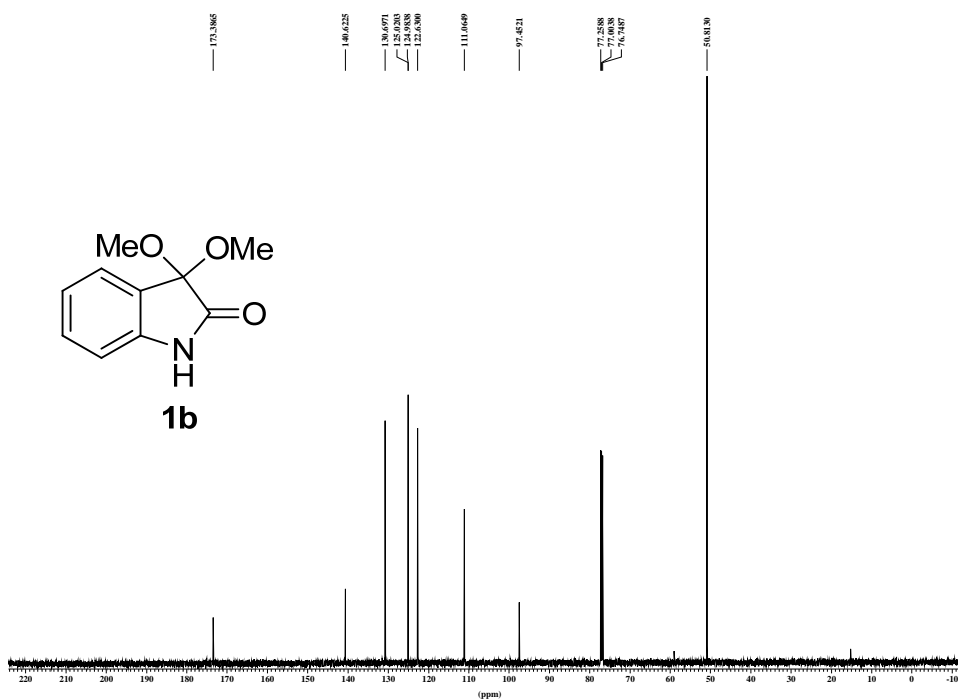

1H AMX500 dxw0324-1 1b

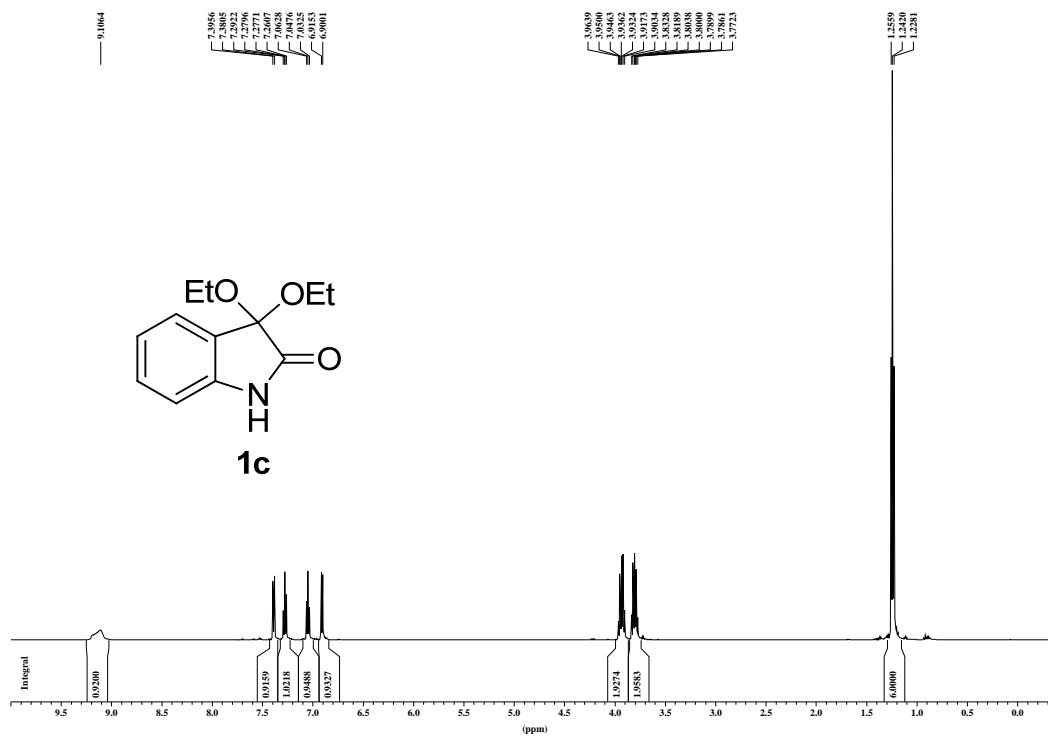

13C AMX500 dxw0324-2 1b

A1 hydr

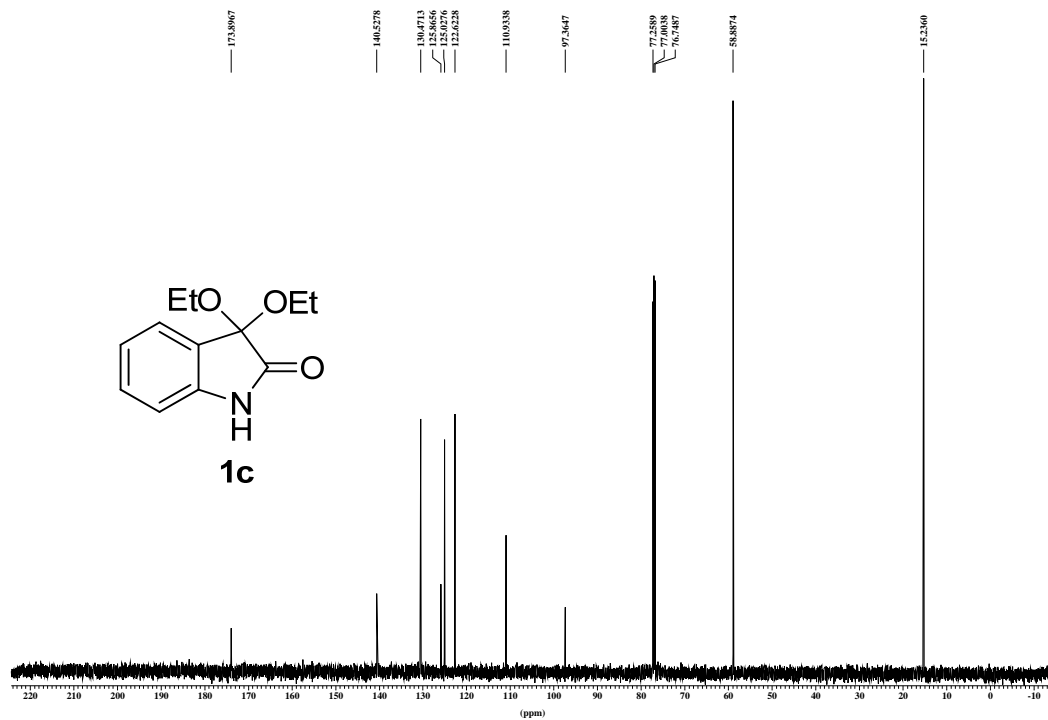

1H AMX500 dxw0324-3 1d

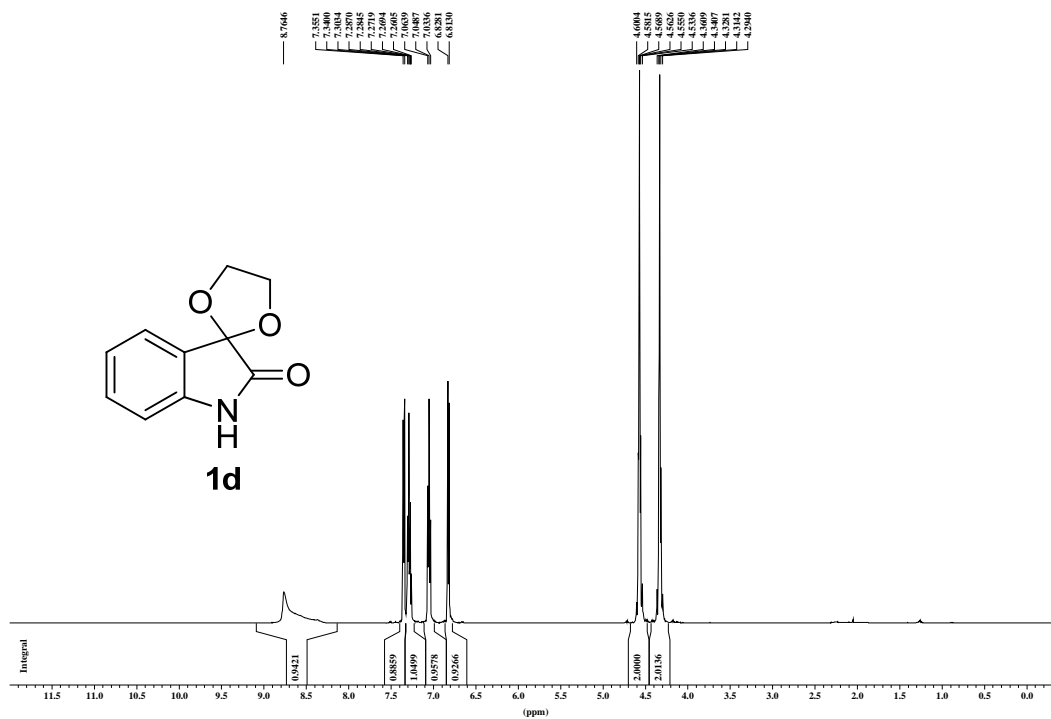

13C AMX500 dxw0324-4 1d  
A1 hydr

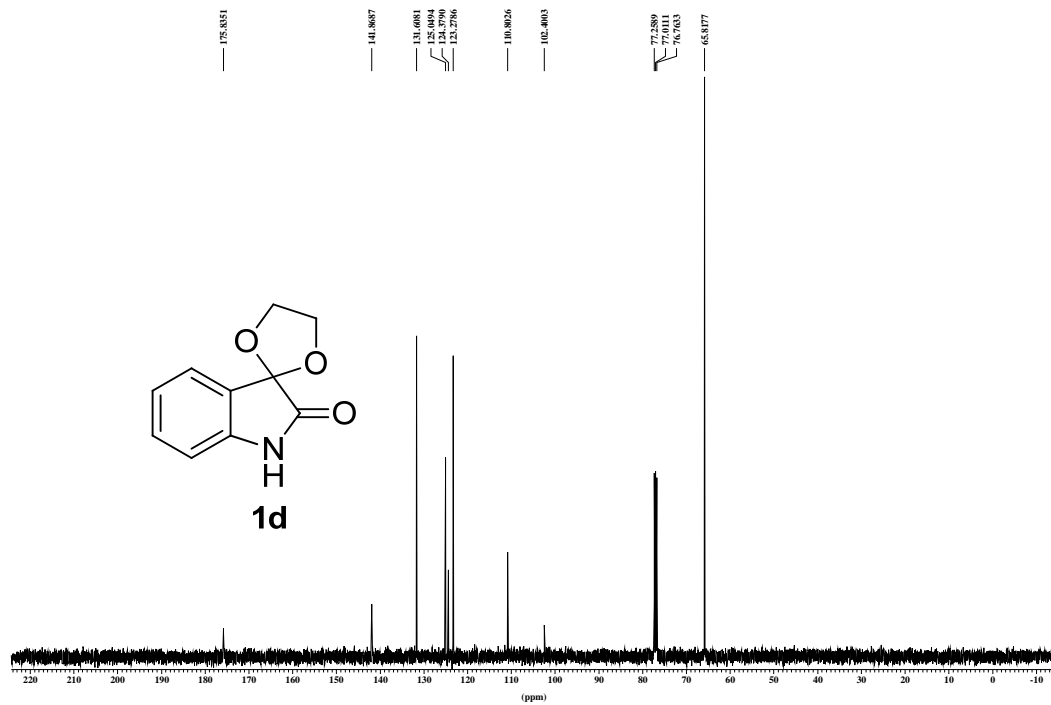



1H AMX500 dsw0324-5 1f

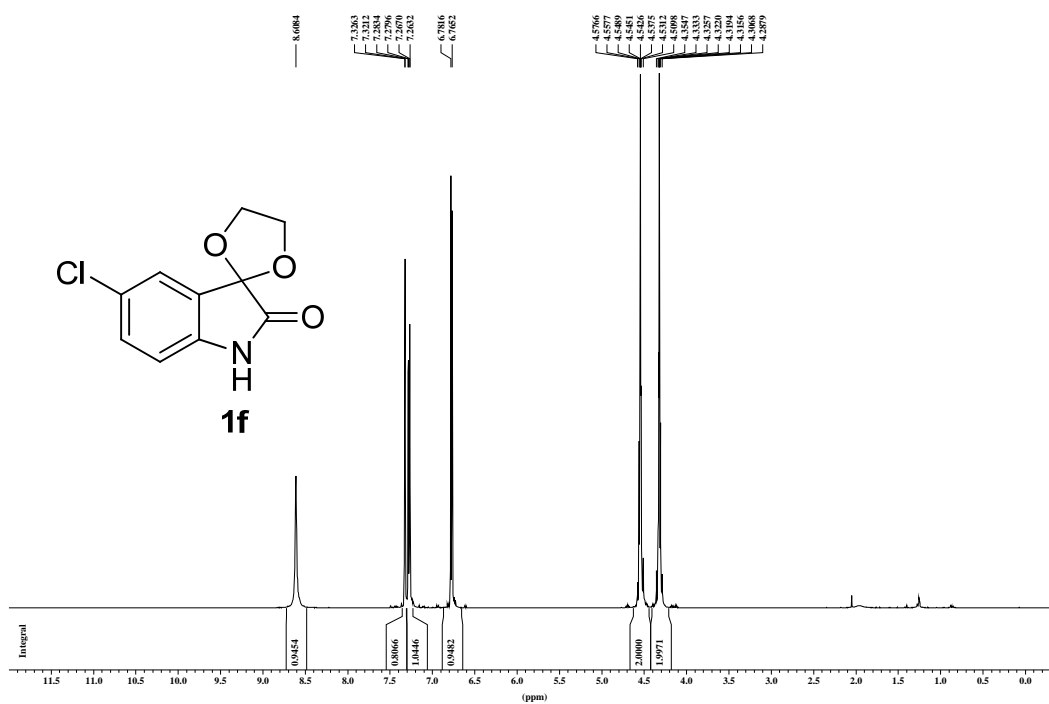

13C AMX500 dsw0324-6 1f

A1 hydr

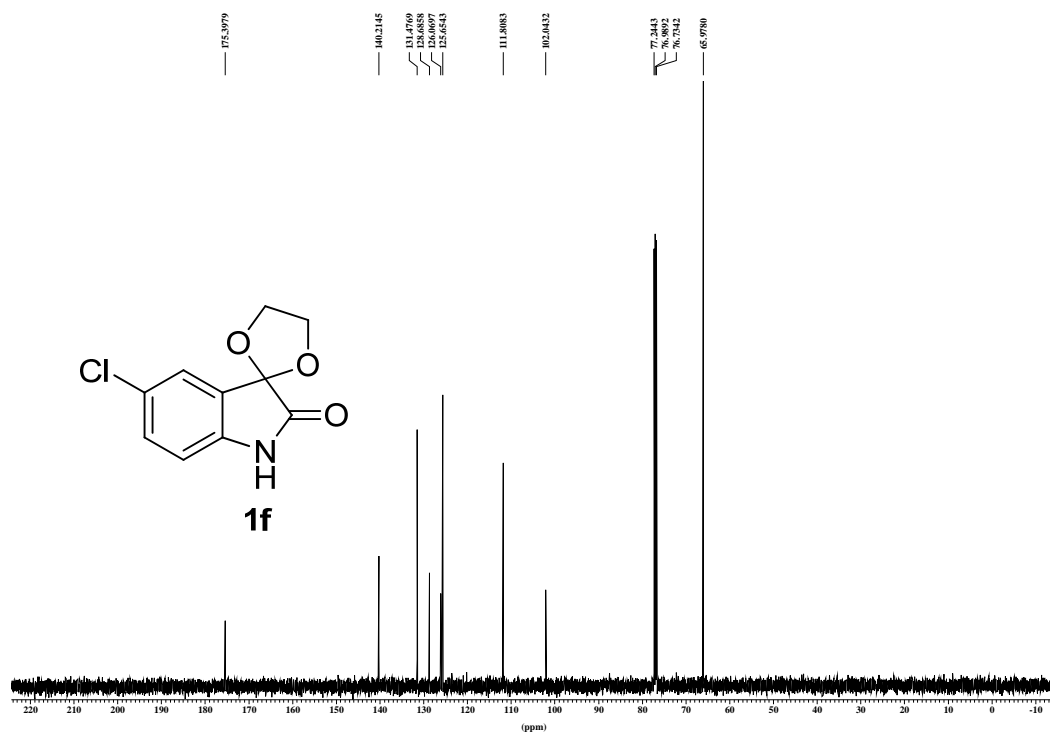

1H AMX500 dxw0324-2-1 1g

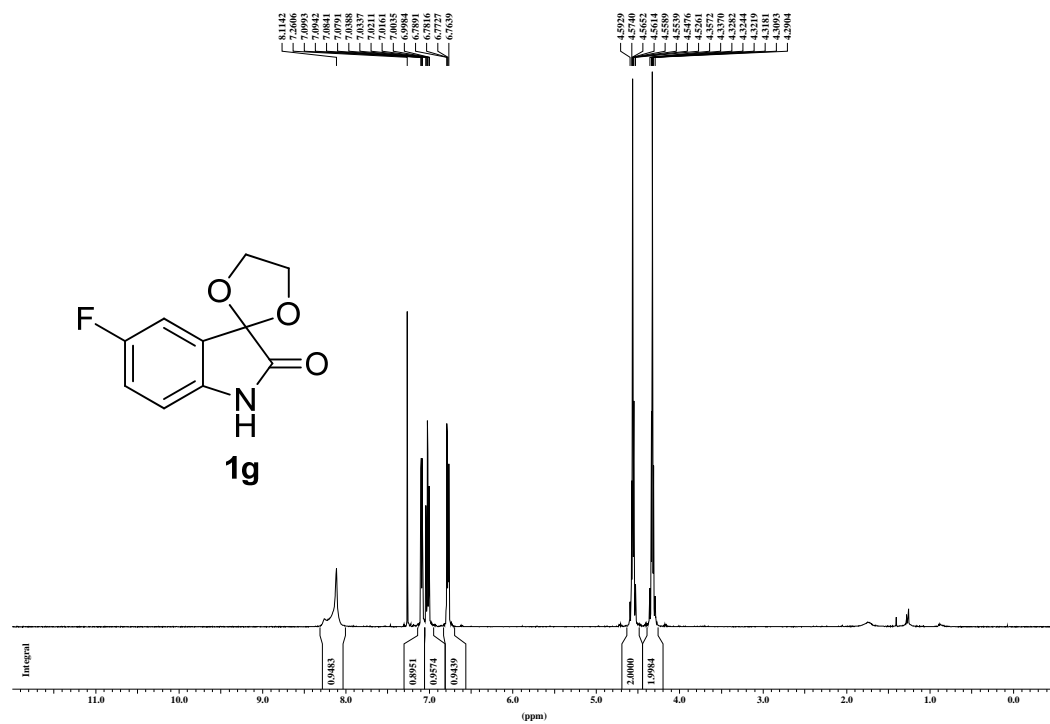

13C AMX500 dxw0324-2-2 1g

A1 hydr

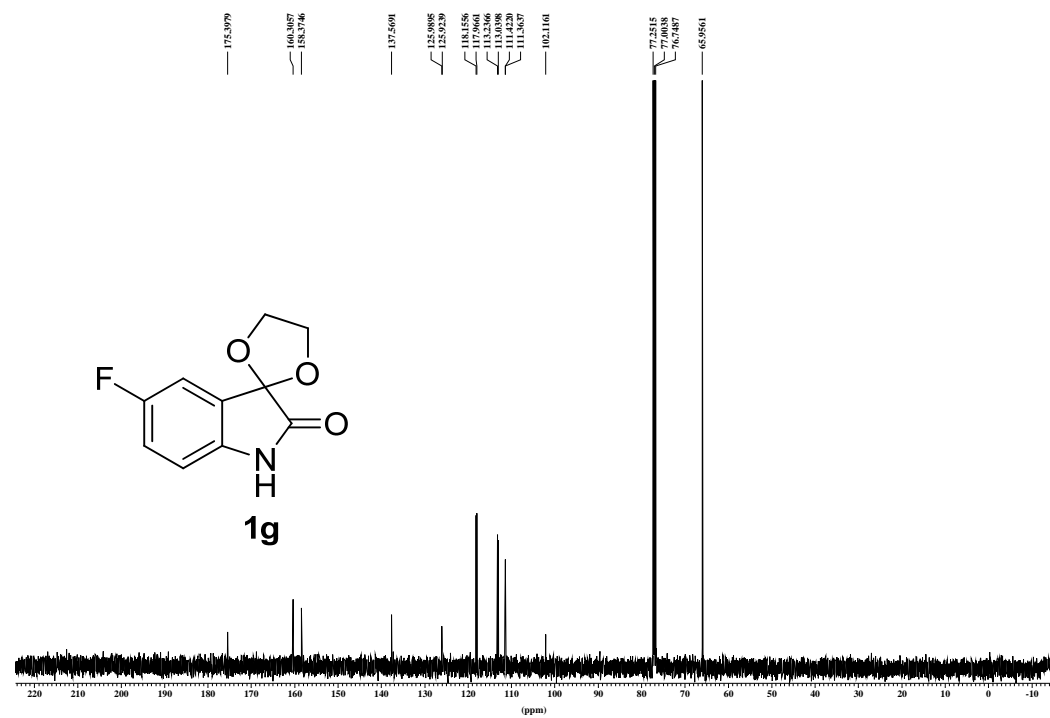

1H AMX500 dxw0721-3-5-OMe substrate

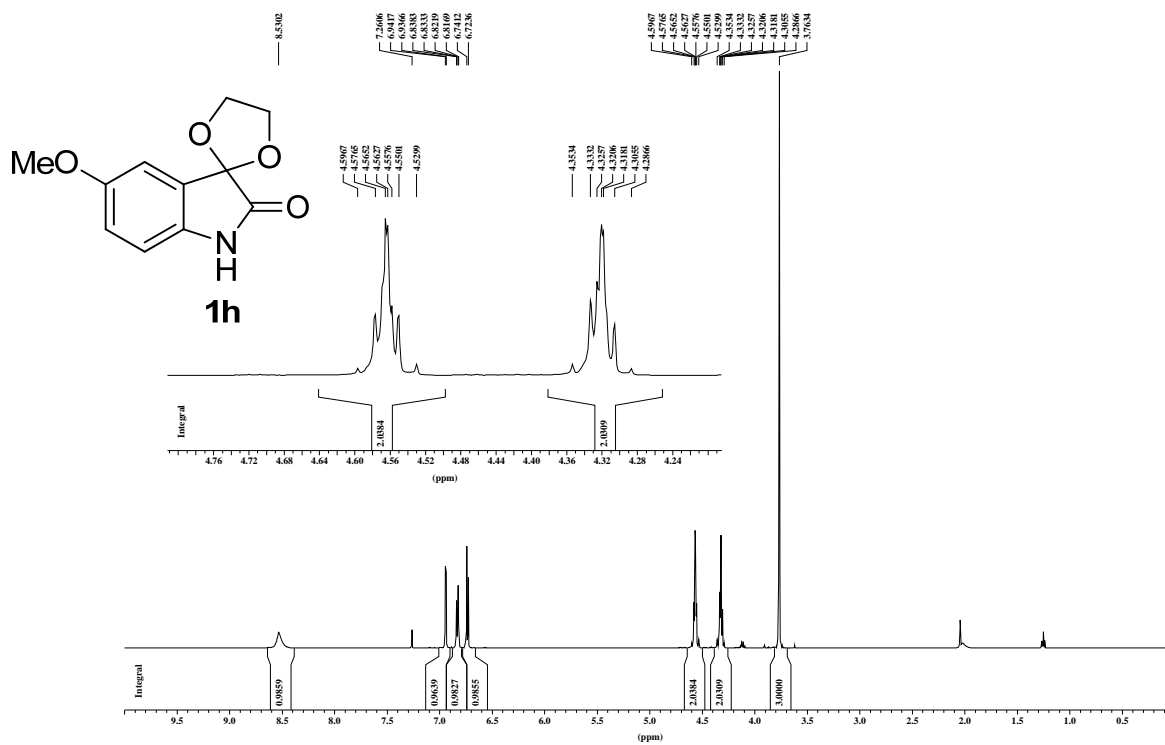

13C AMX500 dxw0721-4 5-OMe-substrate

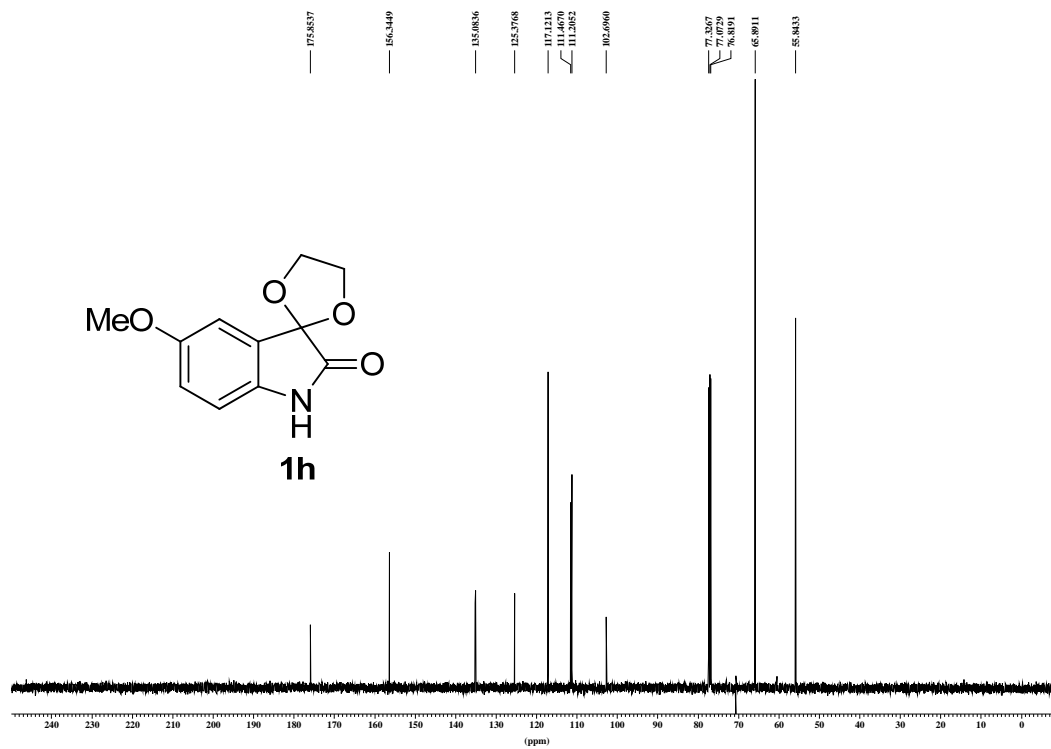

1H AMX500 dsw0324-2-5 li

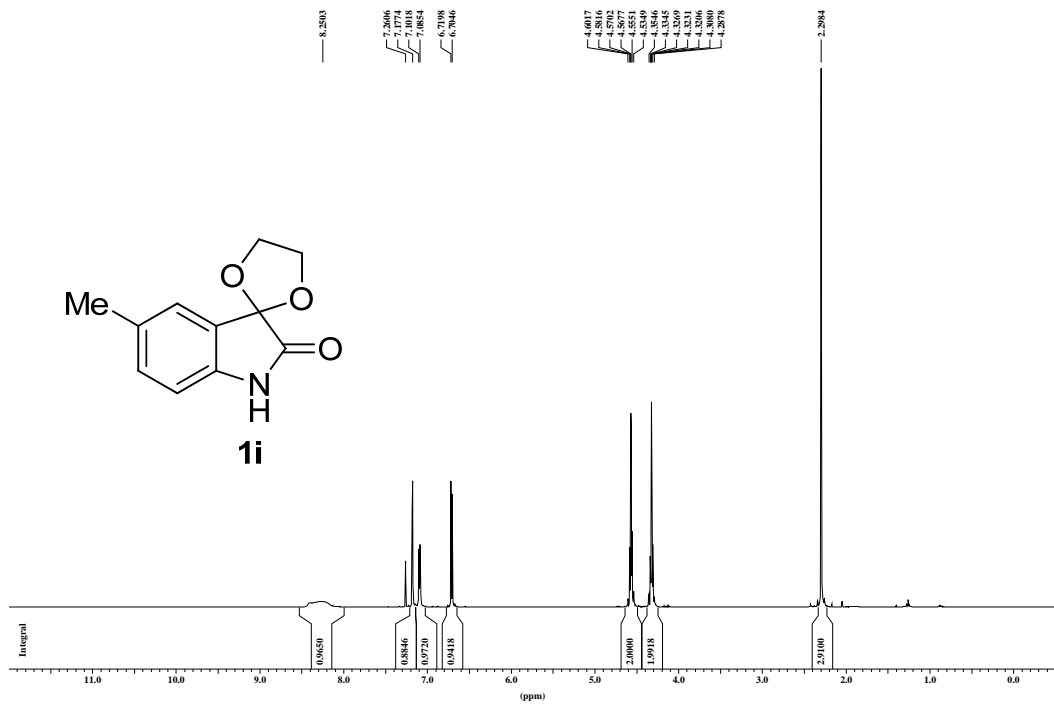

13C AMX500 dsw0324-2-6 li  
A1 hydr

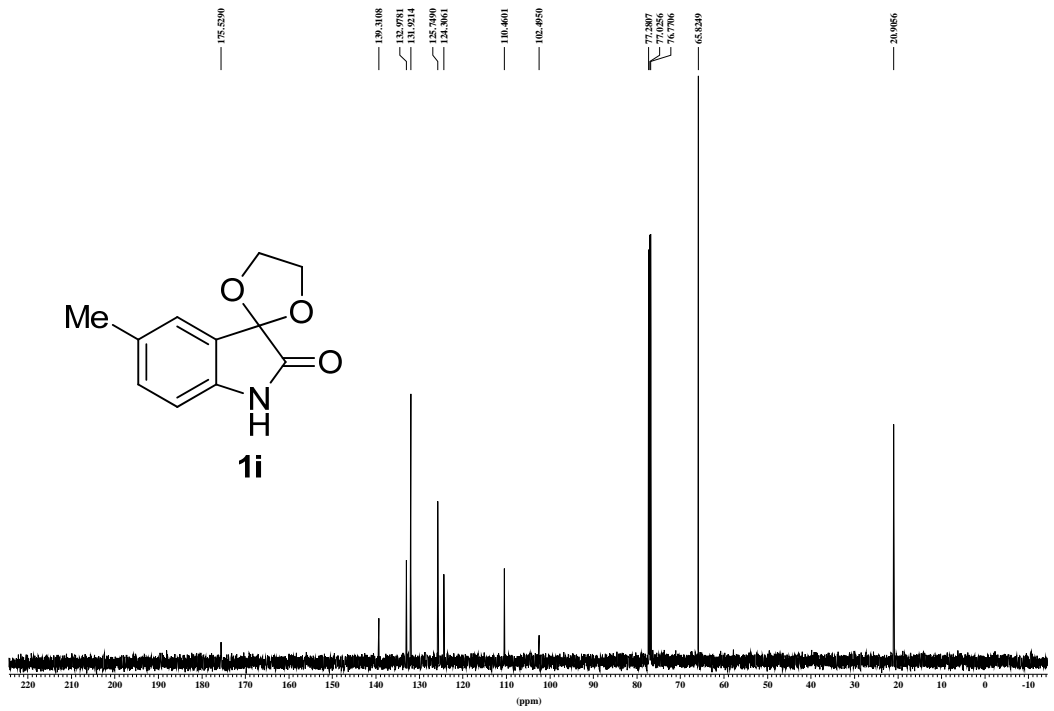



1H AMX500 dxw0827-1 1893H

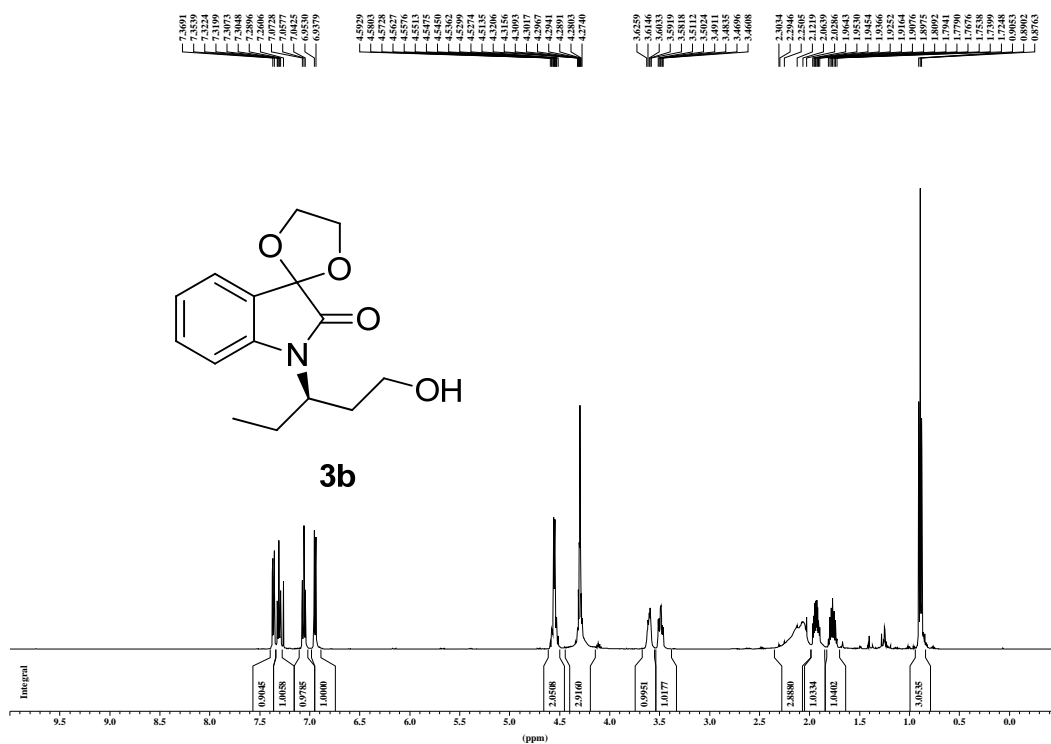

13C AMX500 dxw0827-2 1893C

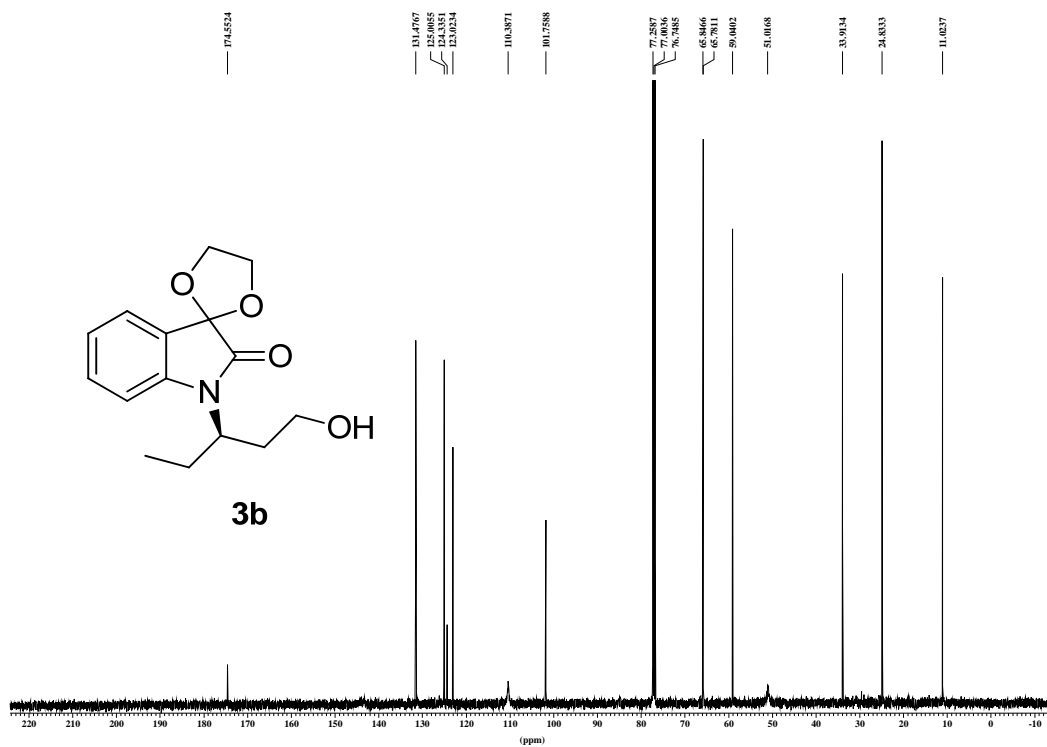



1H AMX500 dxw0218-1 1894H

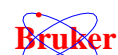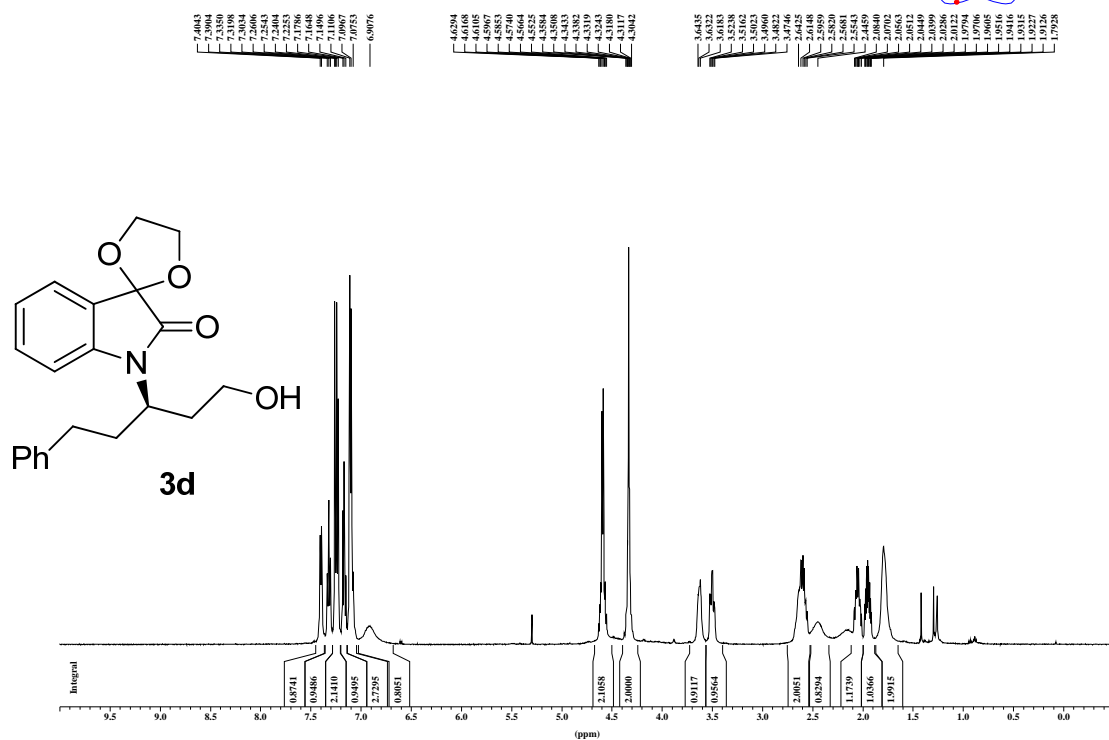

13C AMX500 dxw0312-4 1894C  
A1 hydr

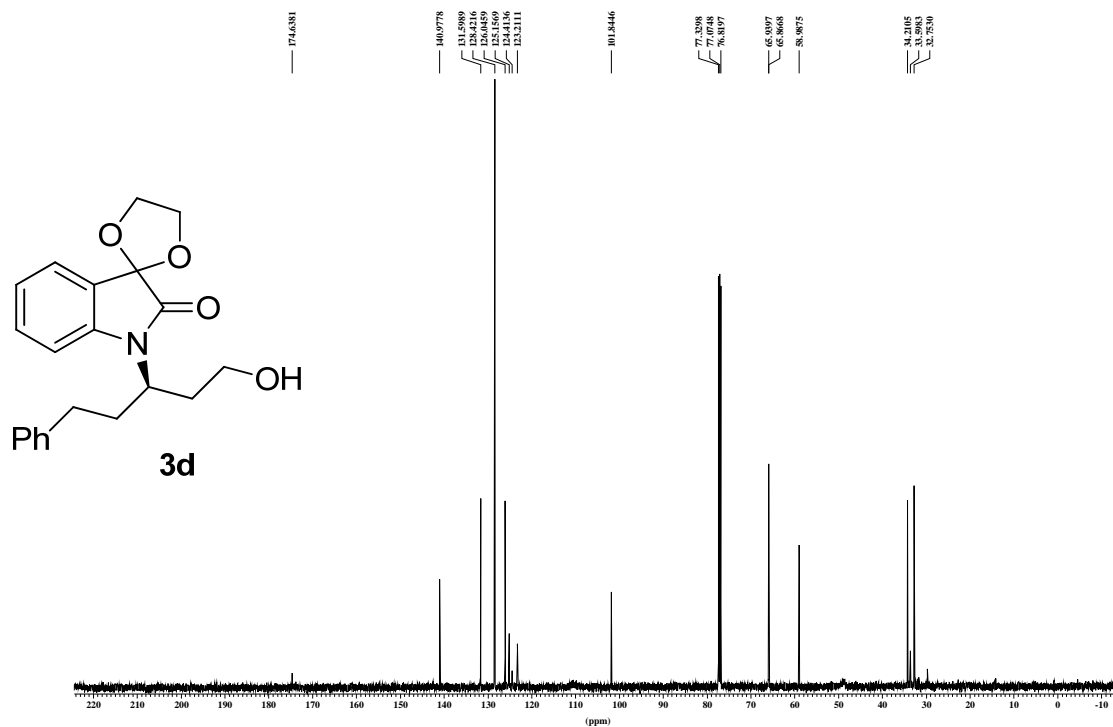



1H AMX500  
dxw

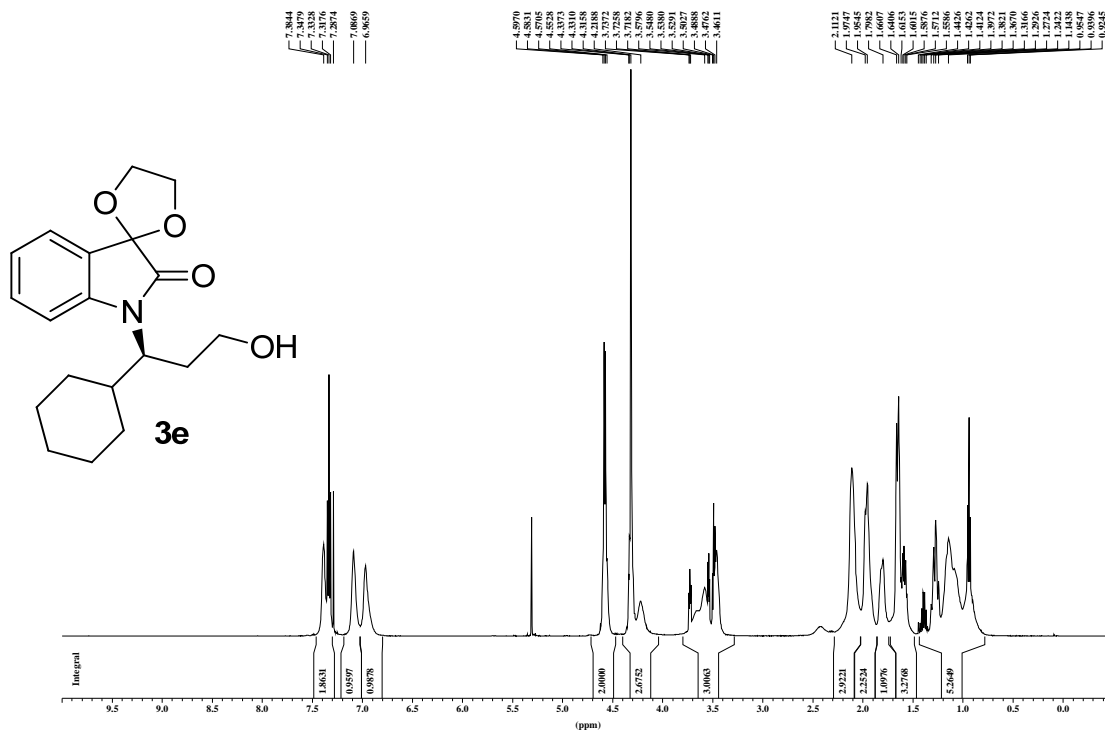

13C AMX500  
dxw

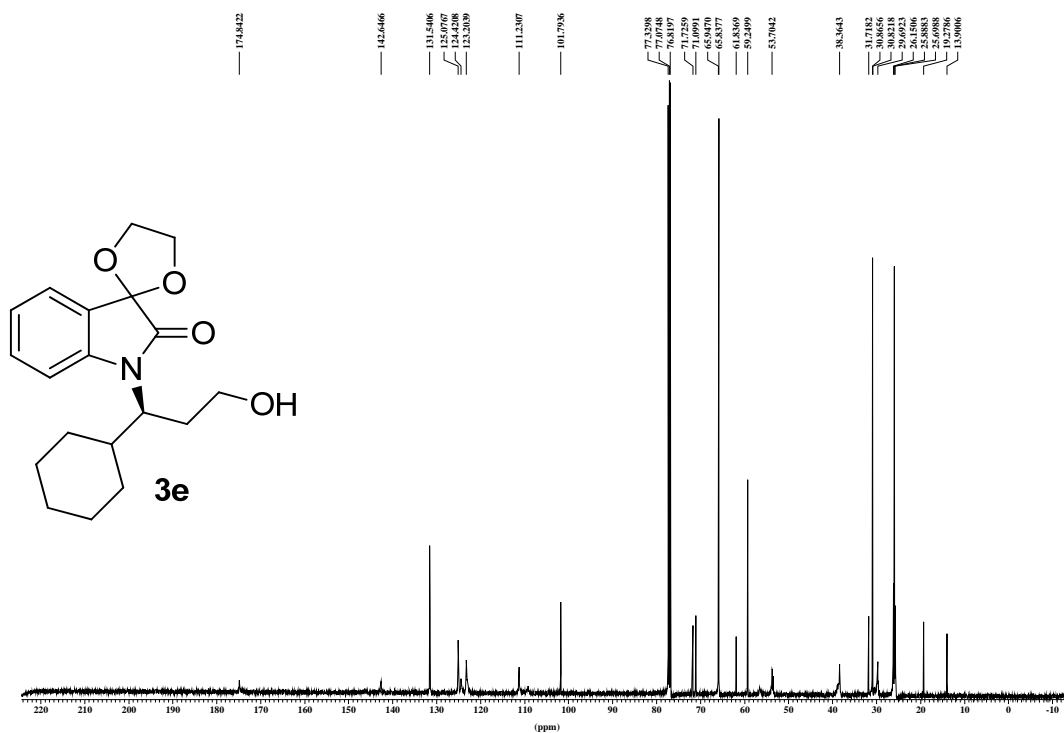

1H AMX500 dxw0904-3 1903H

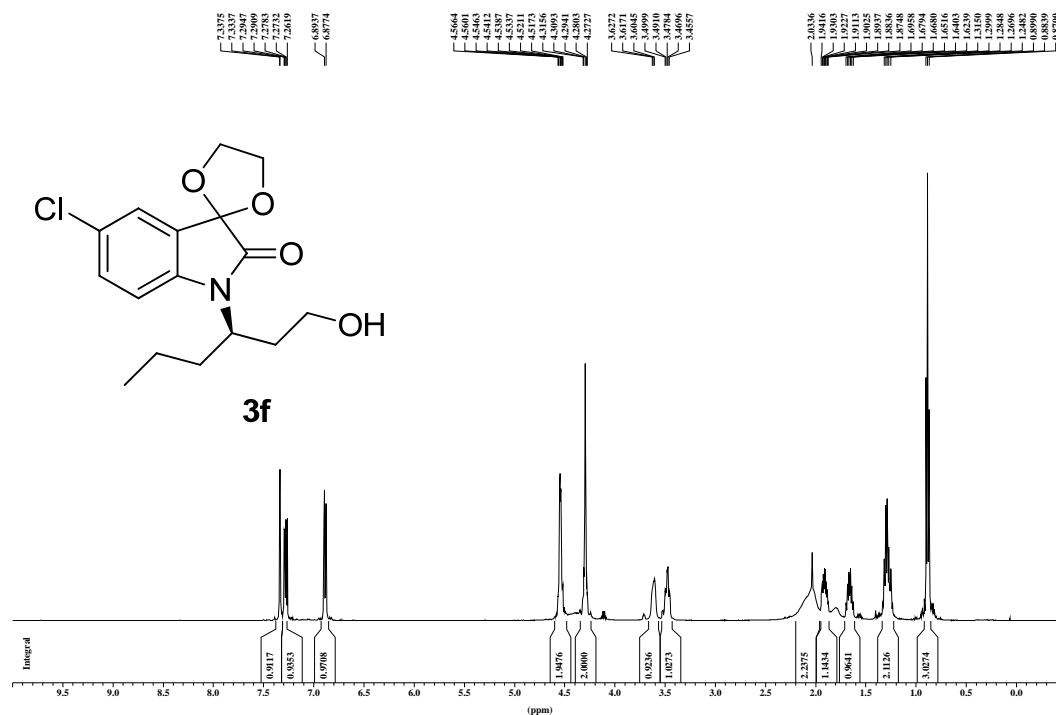

13C AMX500 dxw0904-4 1903C

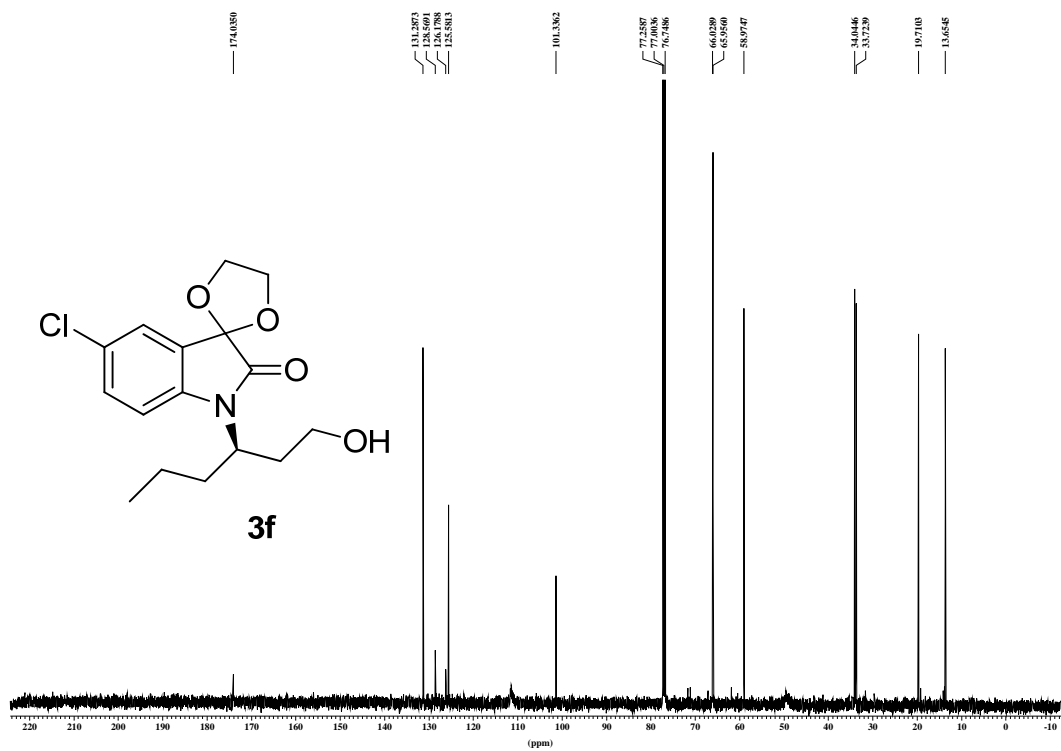

1H AMX500 dxw0904-1 1902H

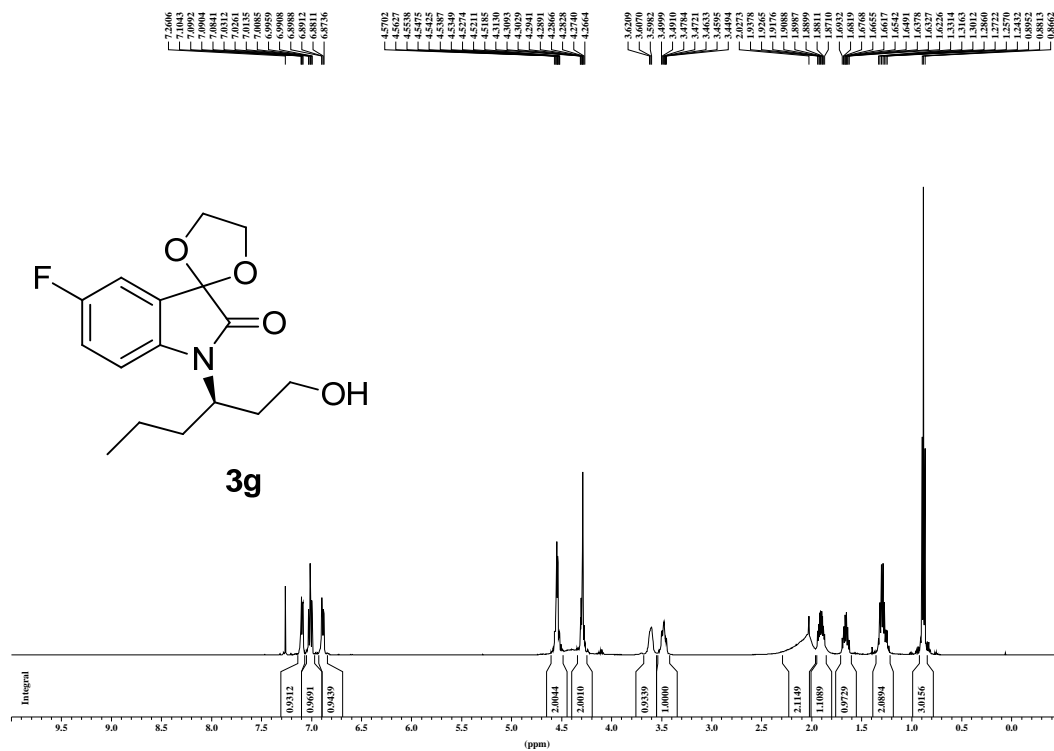

13C AMX500 dxw0904-2 1902C

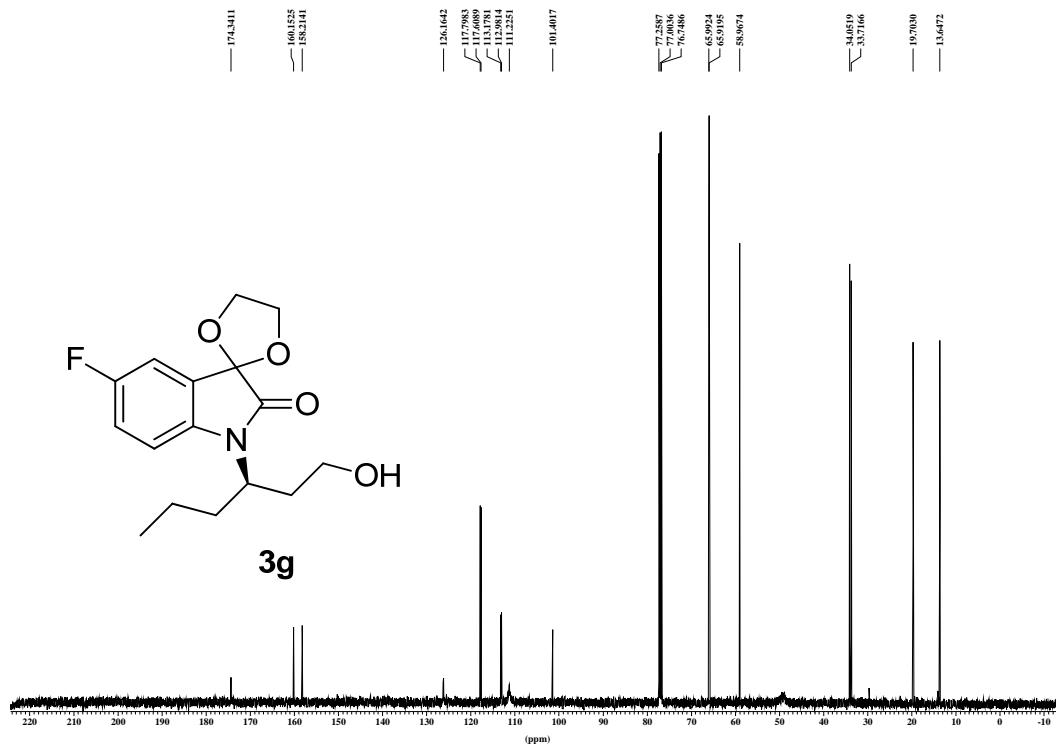

1H AMX500 dxw0829-3 1899H

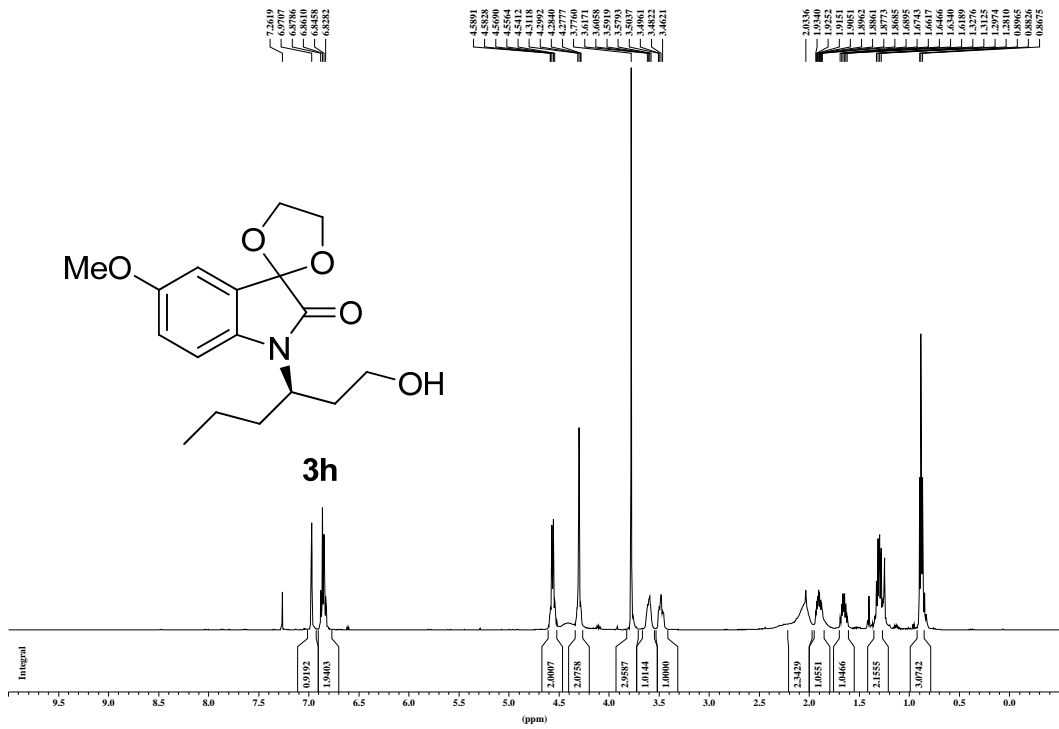

13C AMX500 dxw0829-4 1899C

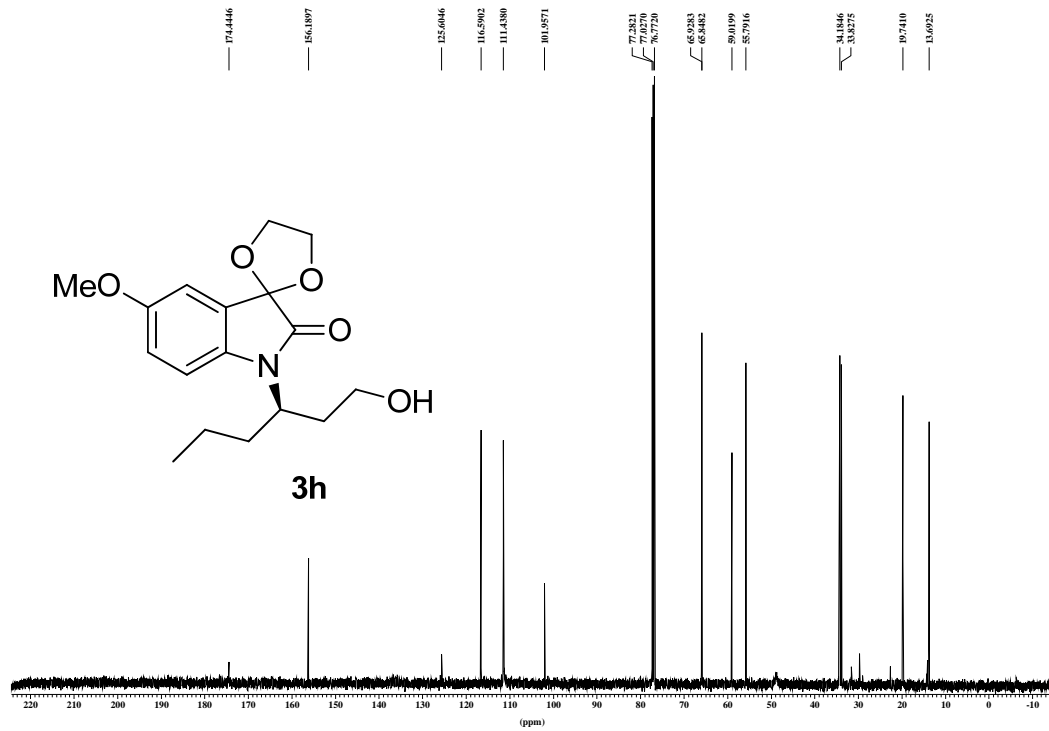

1H AMX500 dxw0829-1 1898H

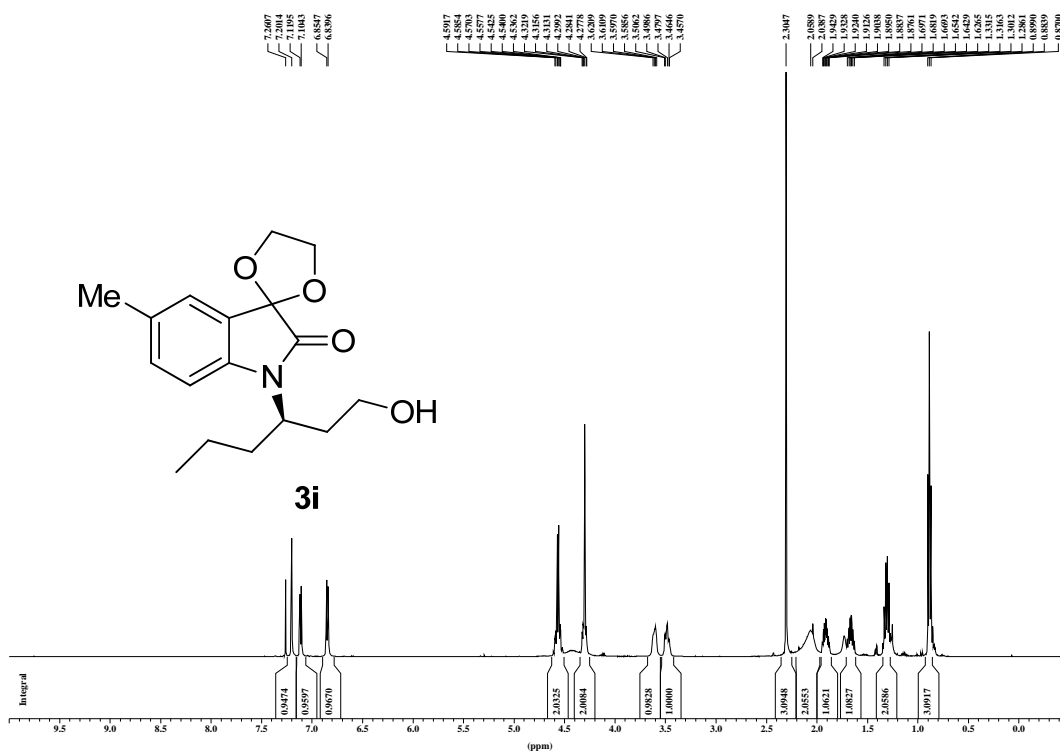

13C AMX500 dxw0829-2 1898C

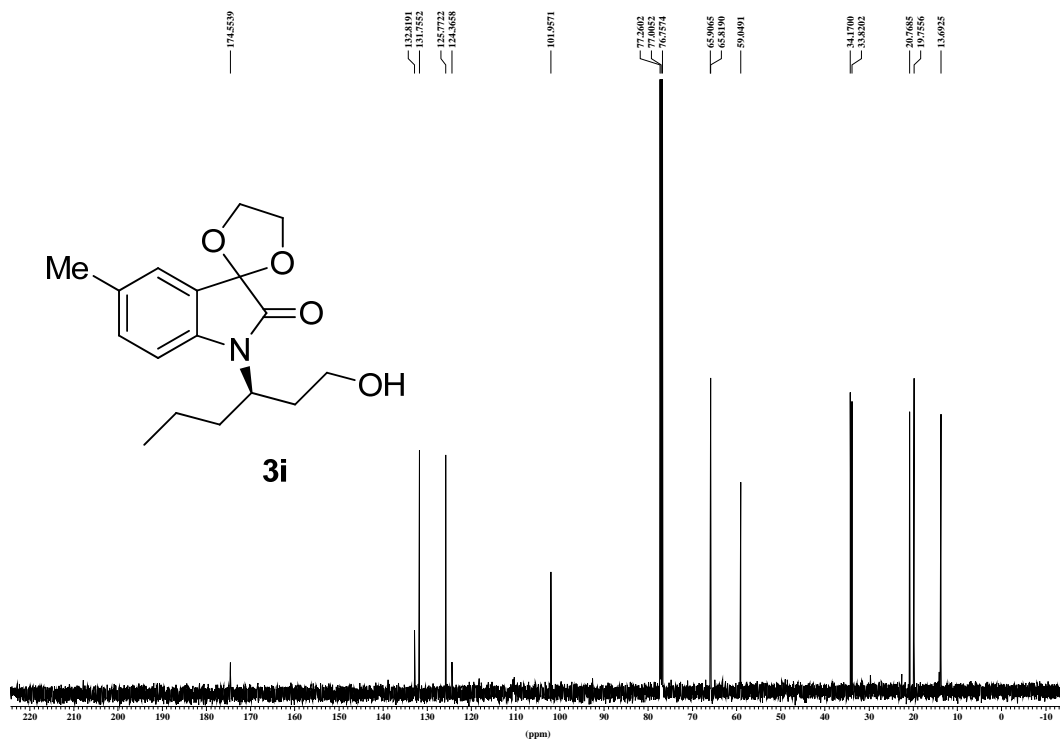

1H AMX500 dxw0911-1 1908H

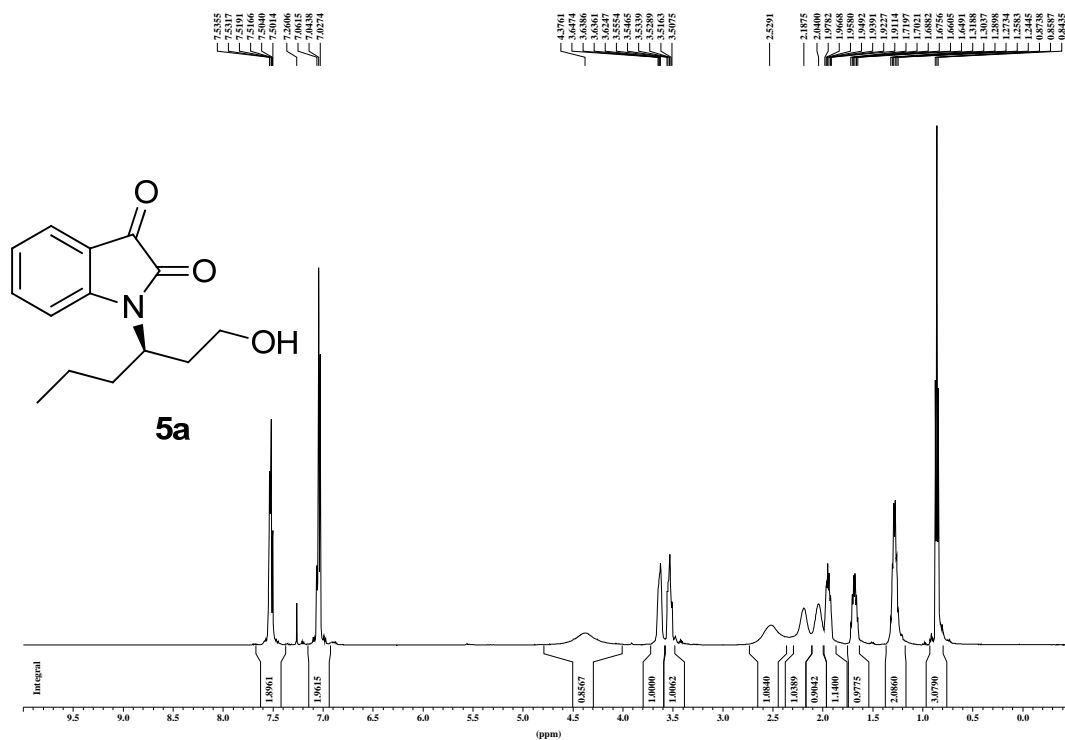

13C AMX500 dxw0911-2 1908C

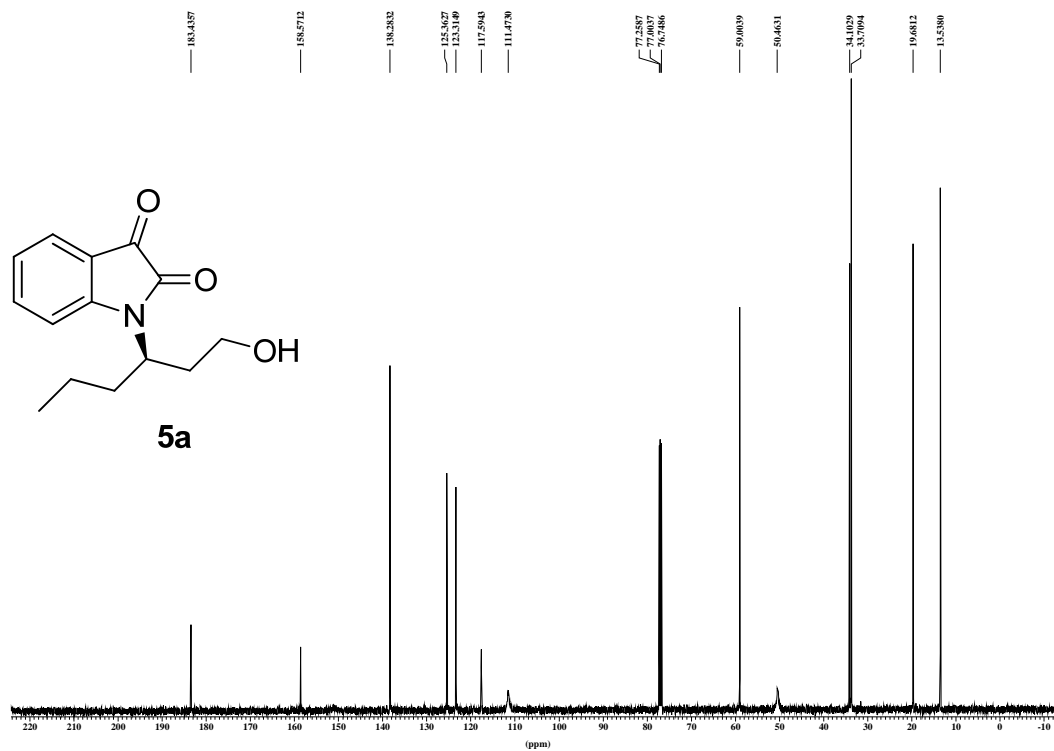

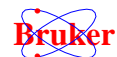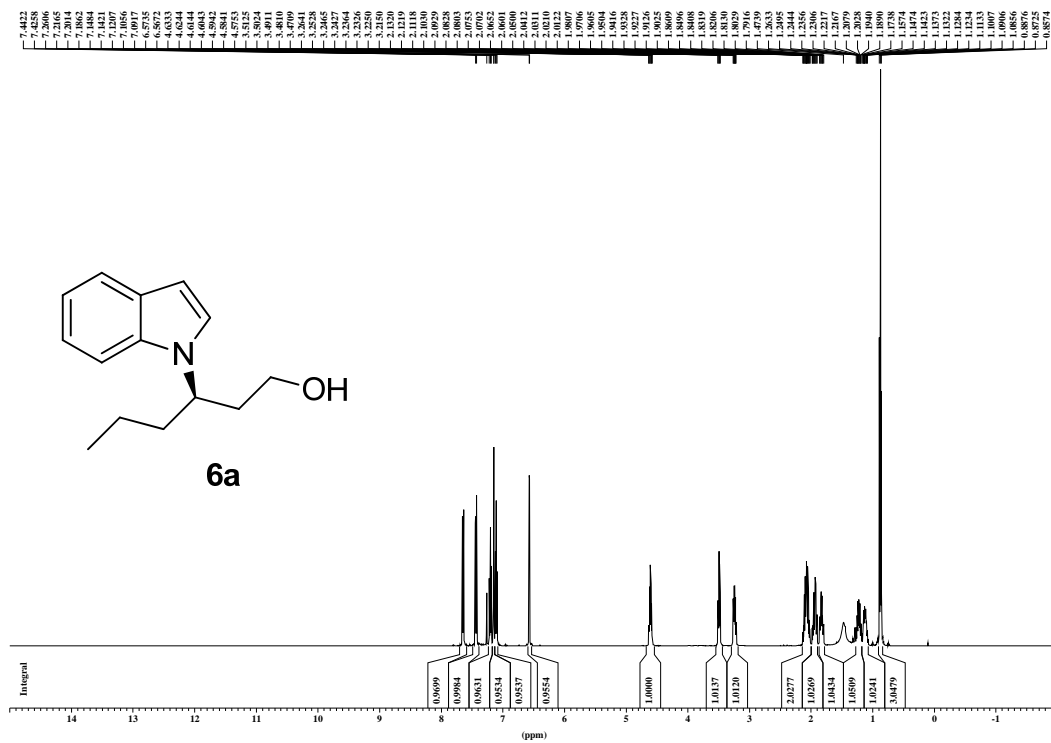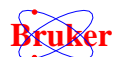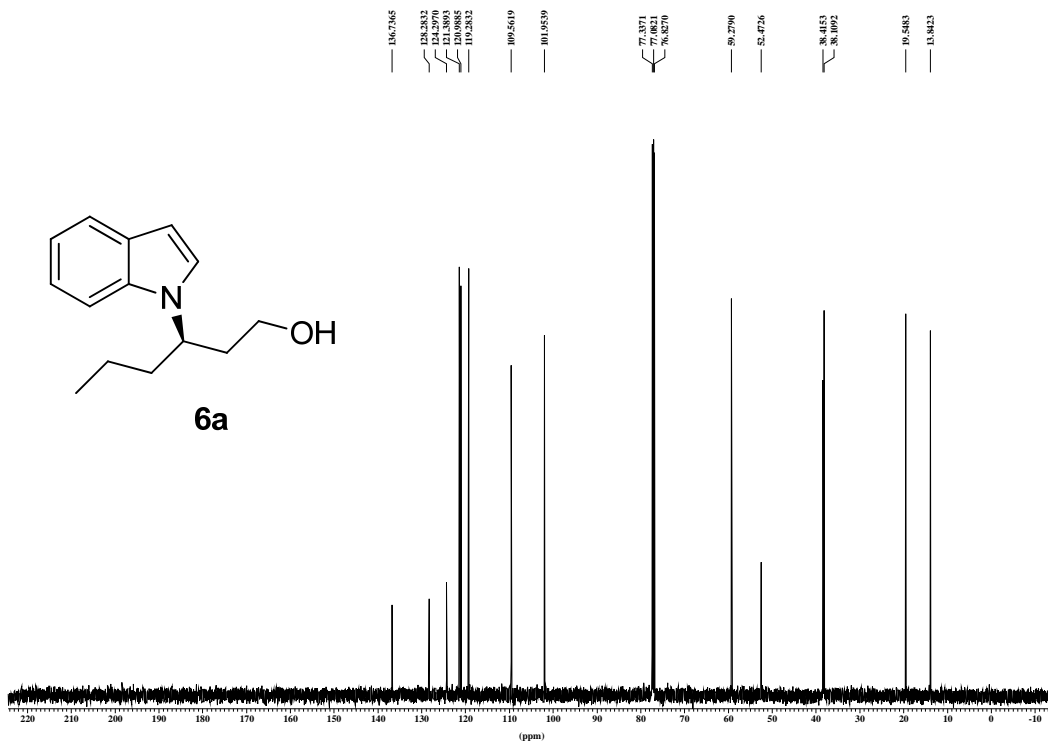

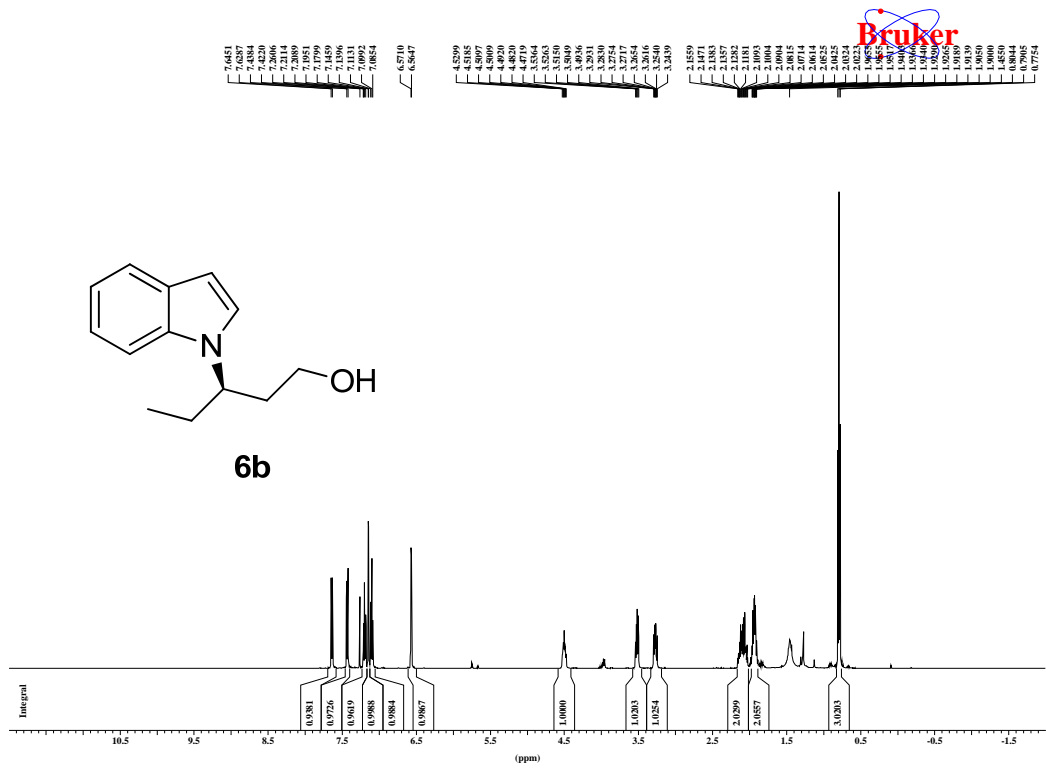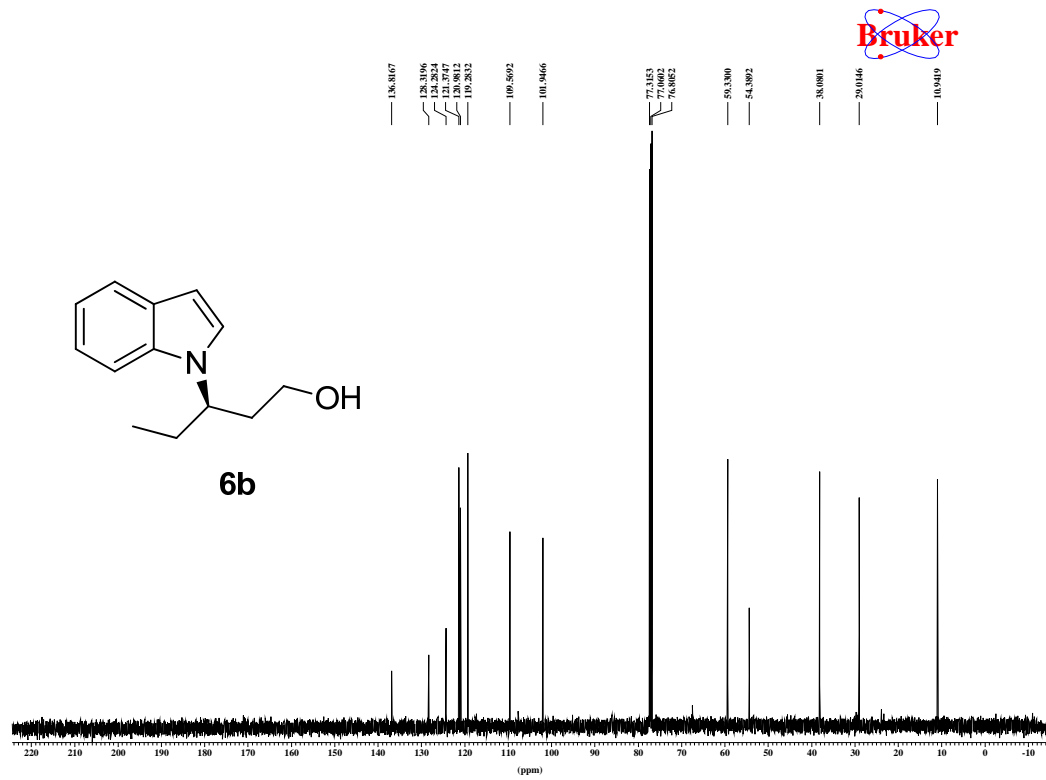



<sup>1</sup>H AMX500 dxw0318-1 indole 6c

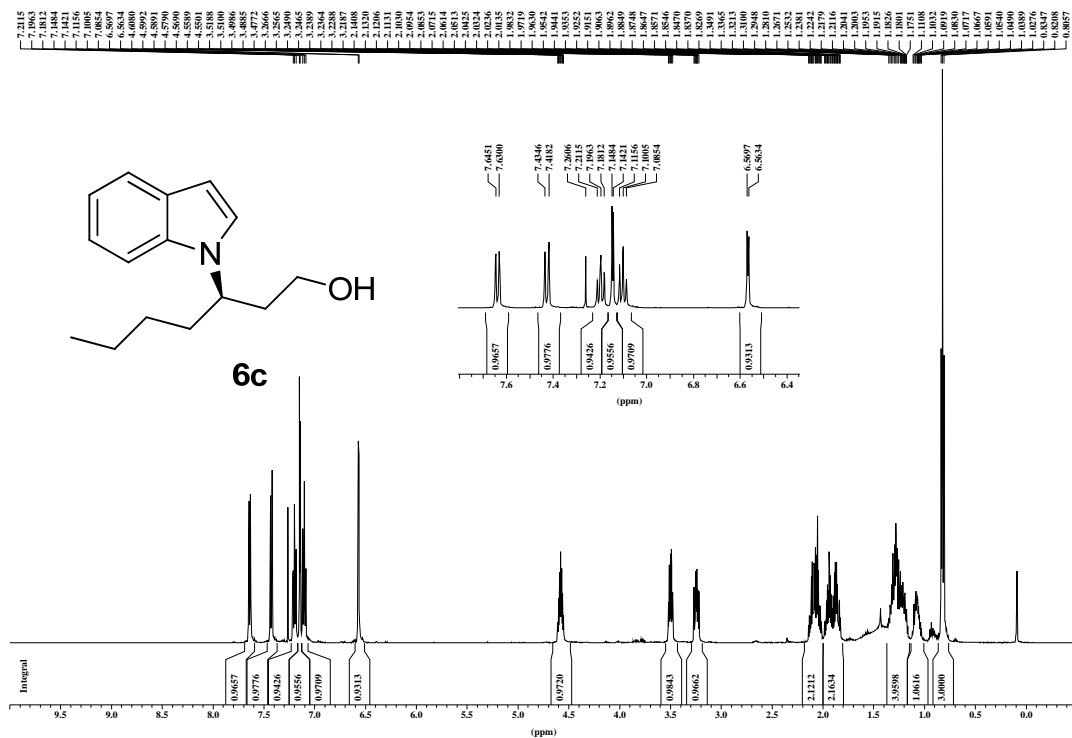

<sup>13</sup>C AMX500 dxw0318-2 indole 6c  
A1 hydr

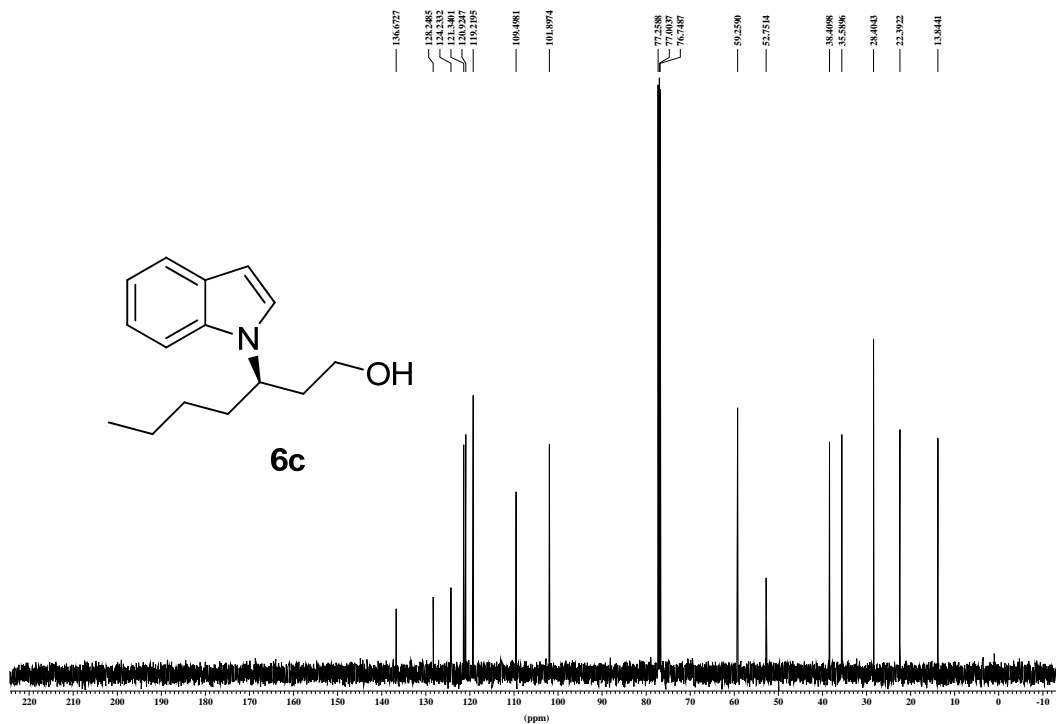

1H AMX500 dxw0704-1 1877H

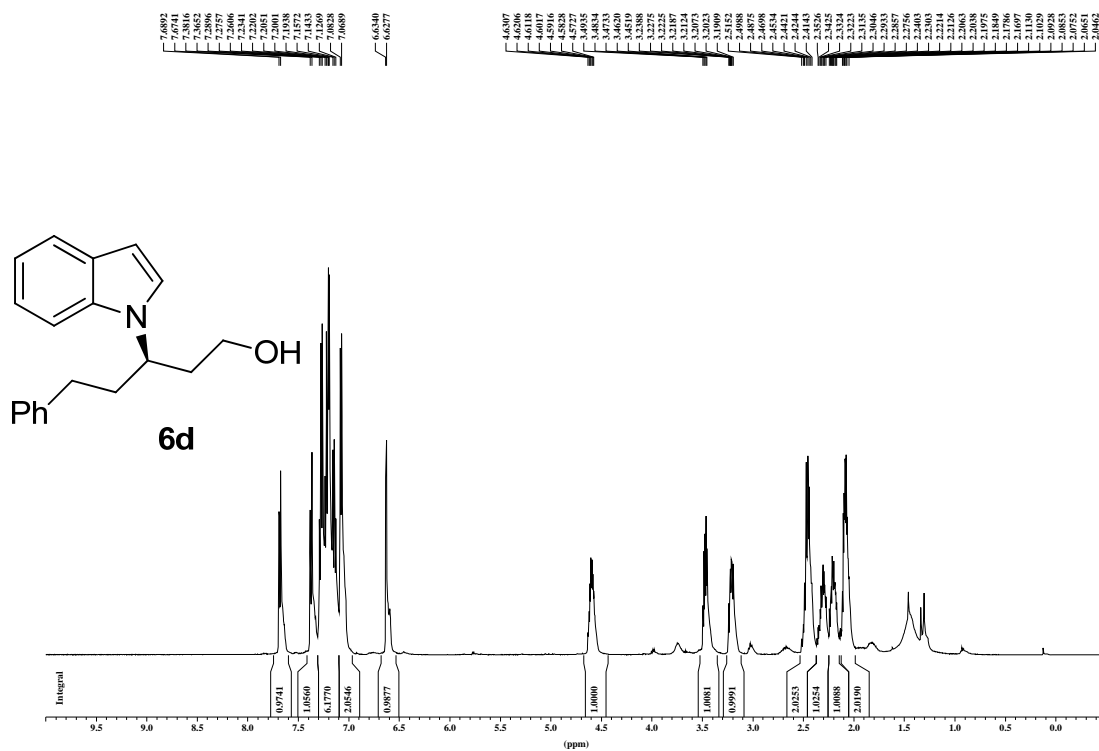

13C AMX500 dxw0704-2 1877C

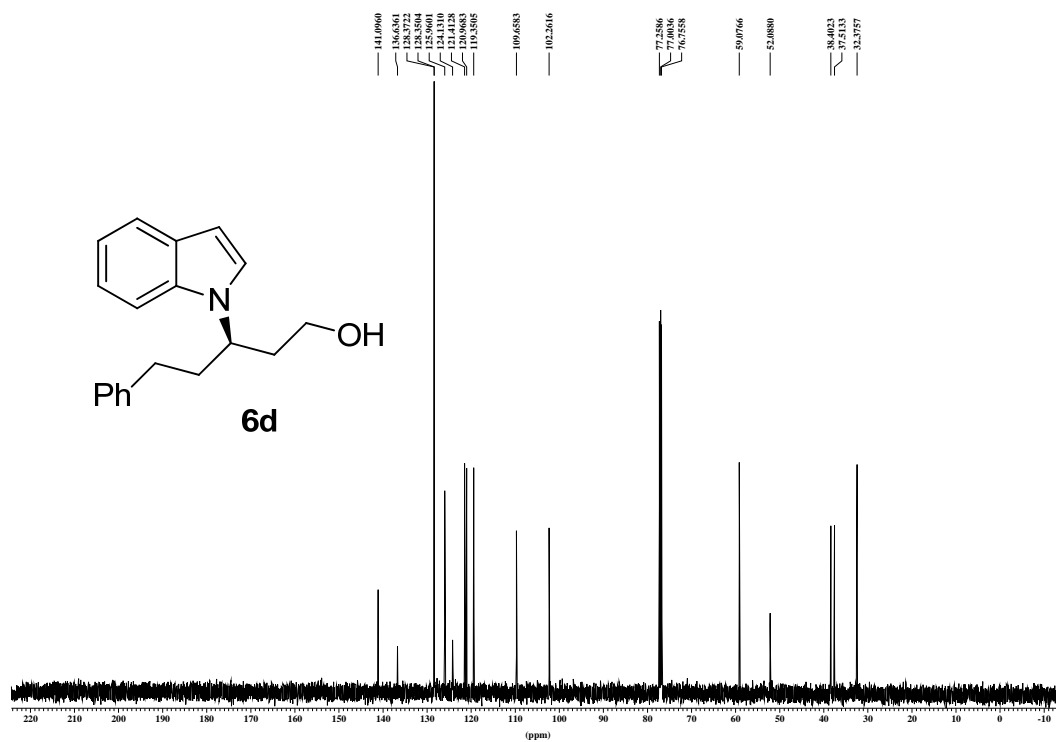

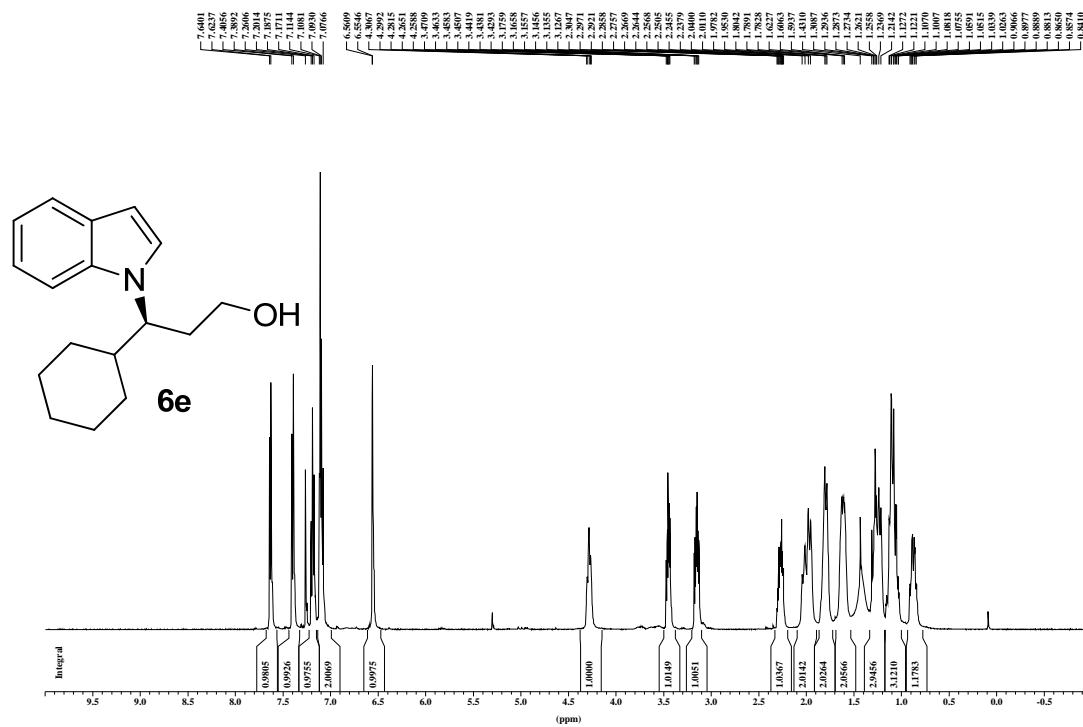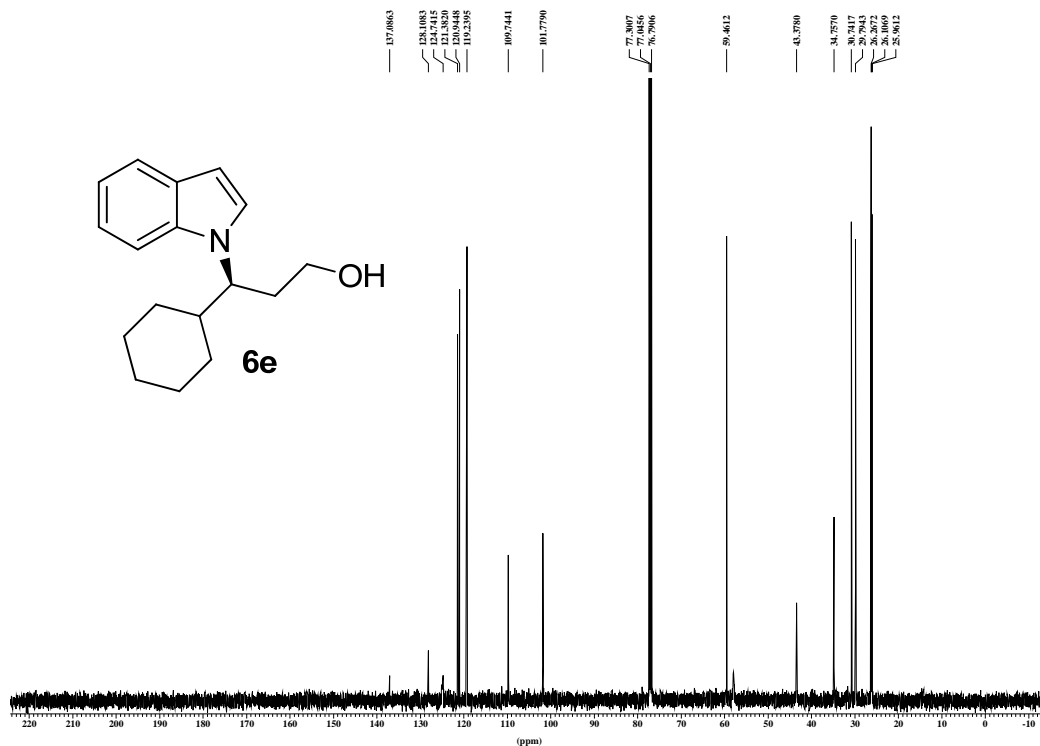

1H AMX500 dxw0318-3 indole 6f

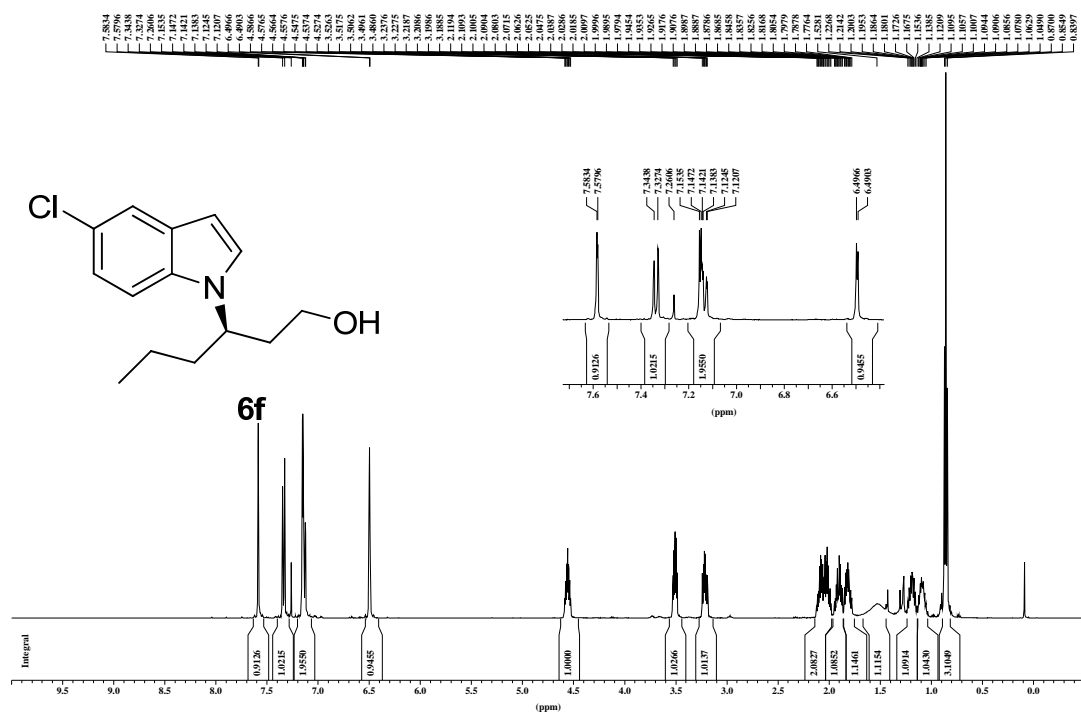

13C AMX500 dxw0318-4 indole 6f  
A1 hydr

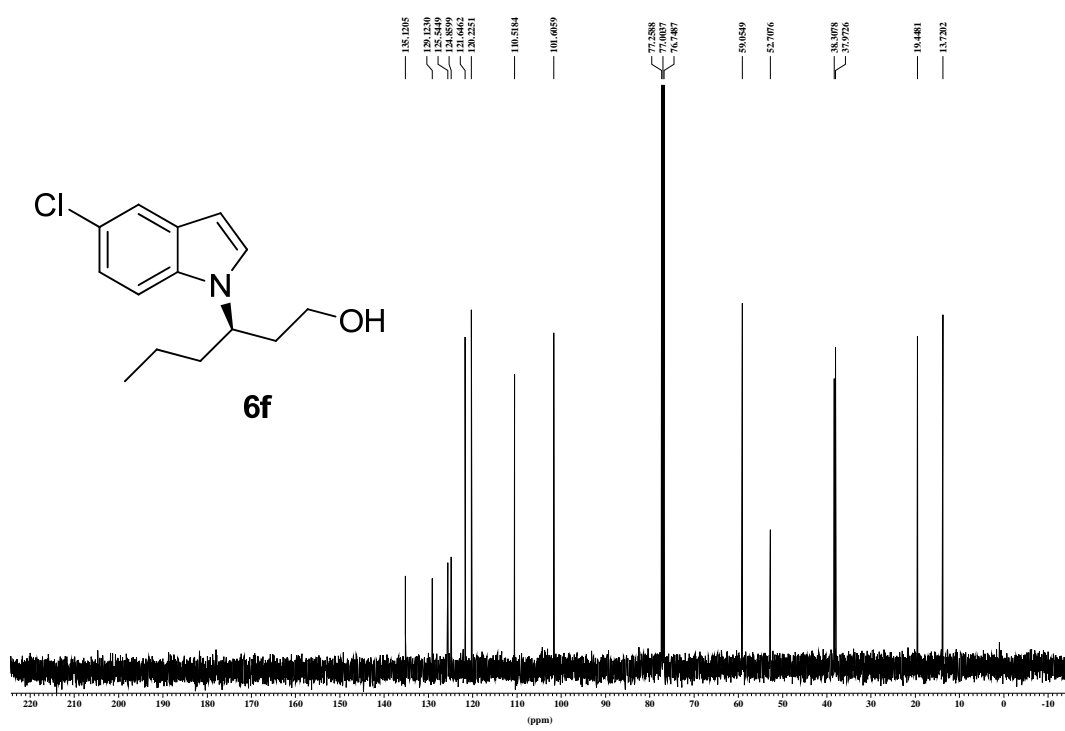

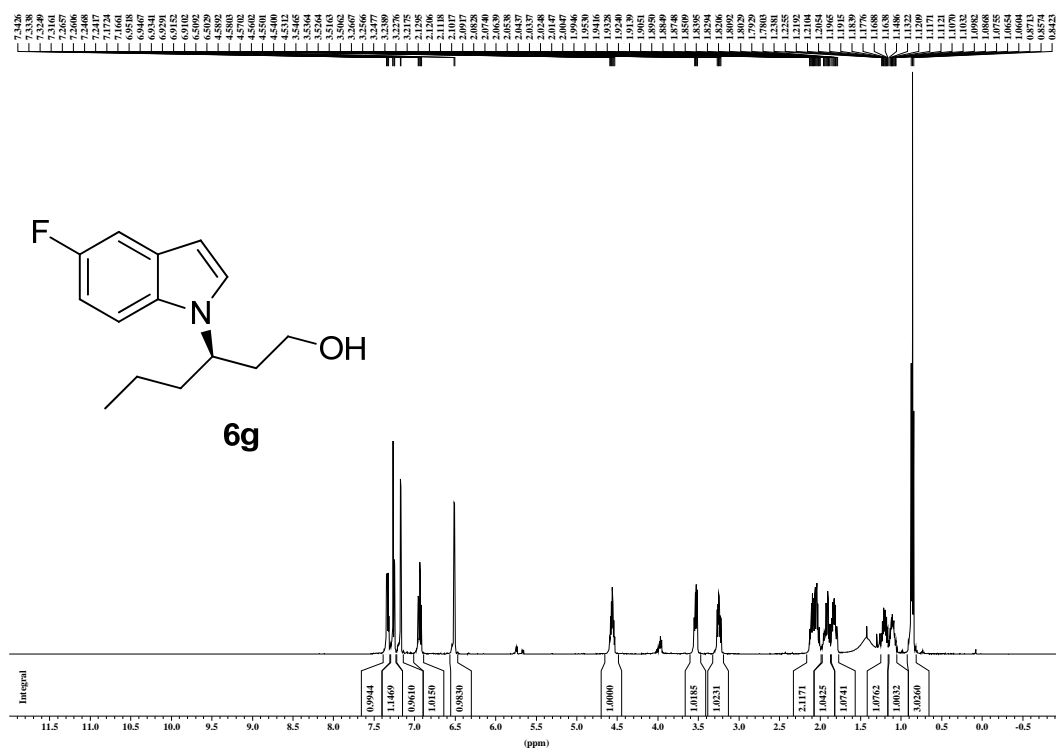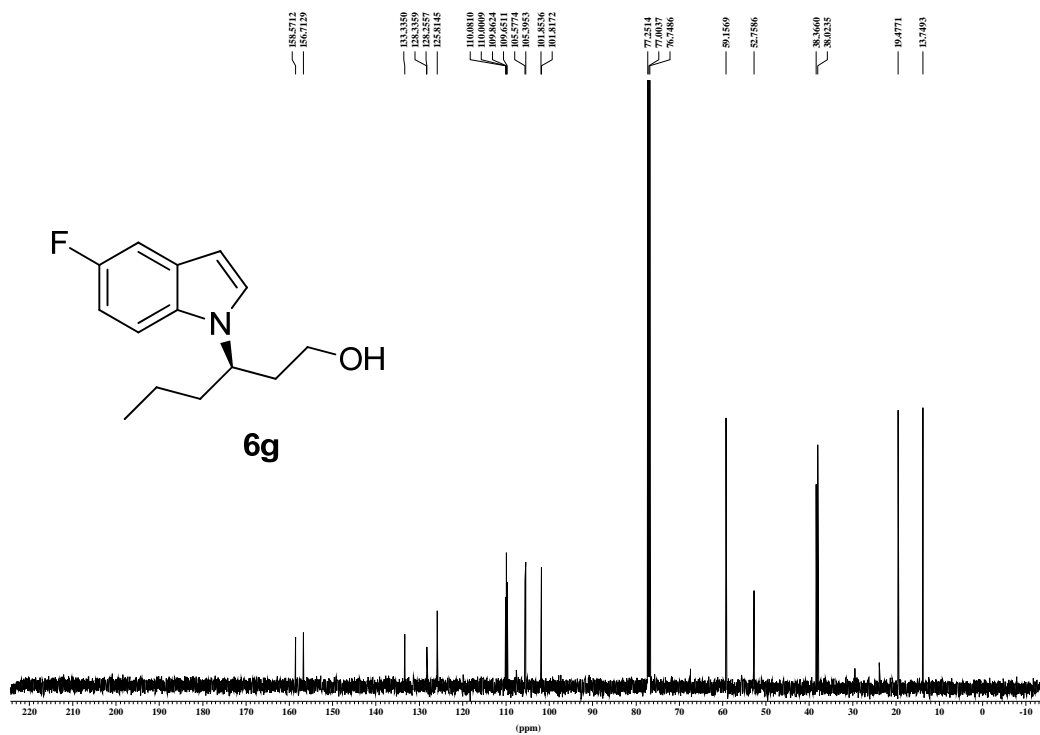

1H AMX500 dxw0620-1 1868H

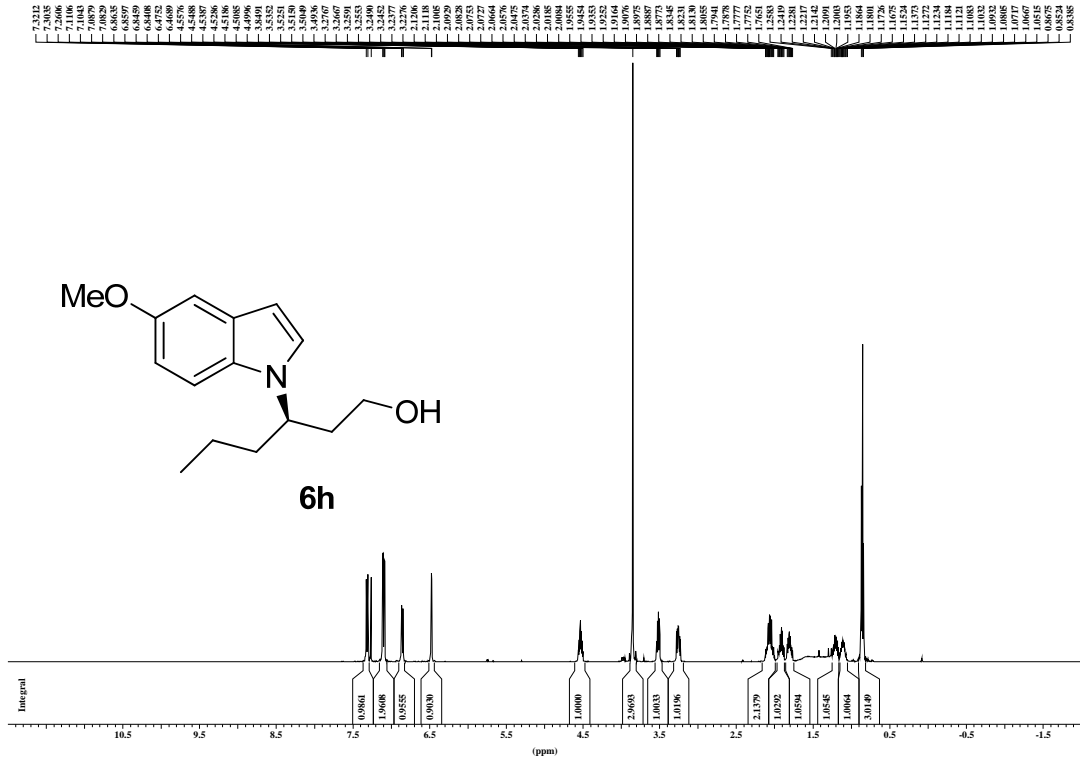

13C AMX500 dxw0620-2 1868C

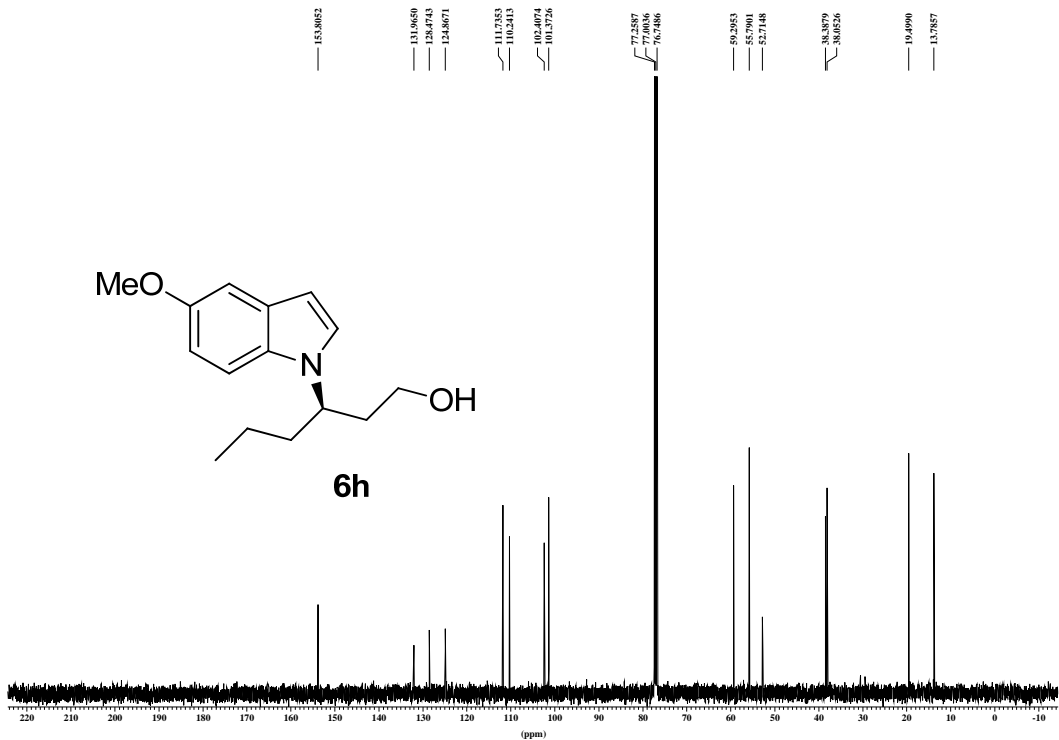

1H AMX500 dxw0318-5 indole 6i

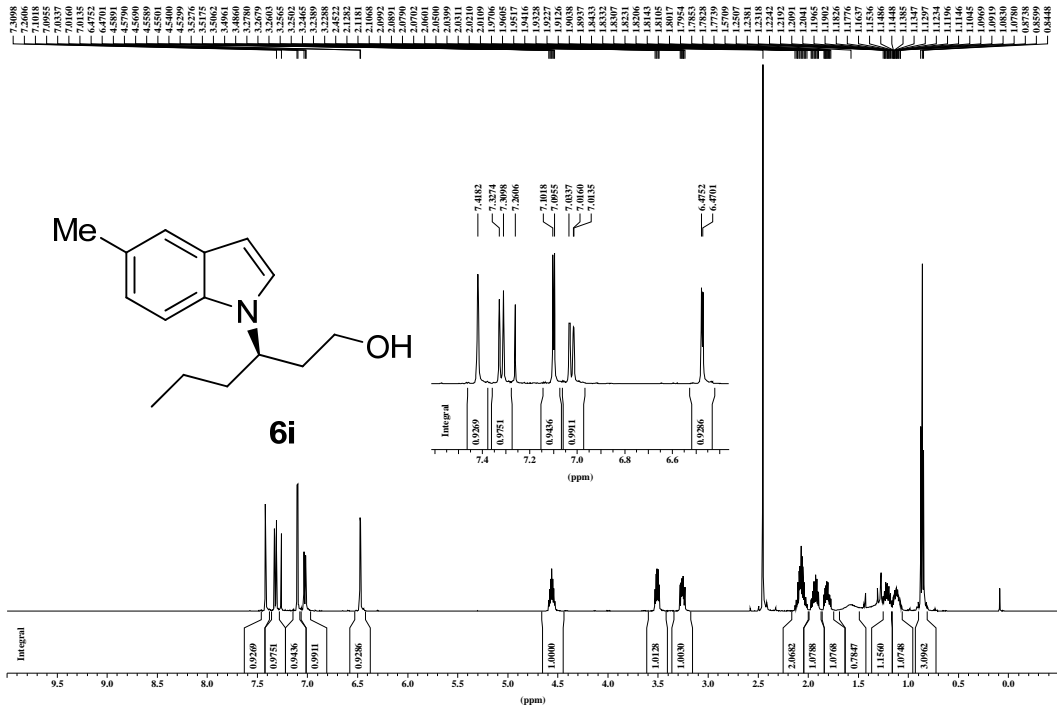

13C AMX500 dxw0318-6 indole 6i  
A1 hydr

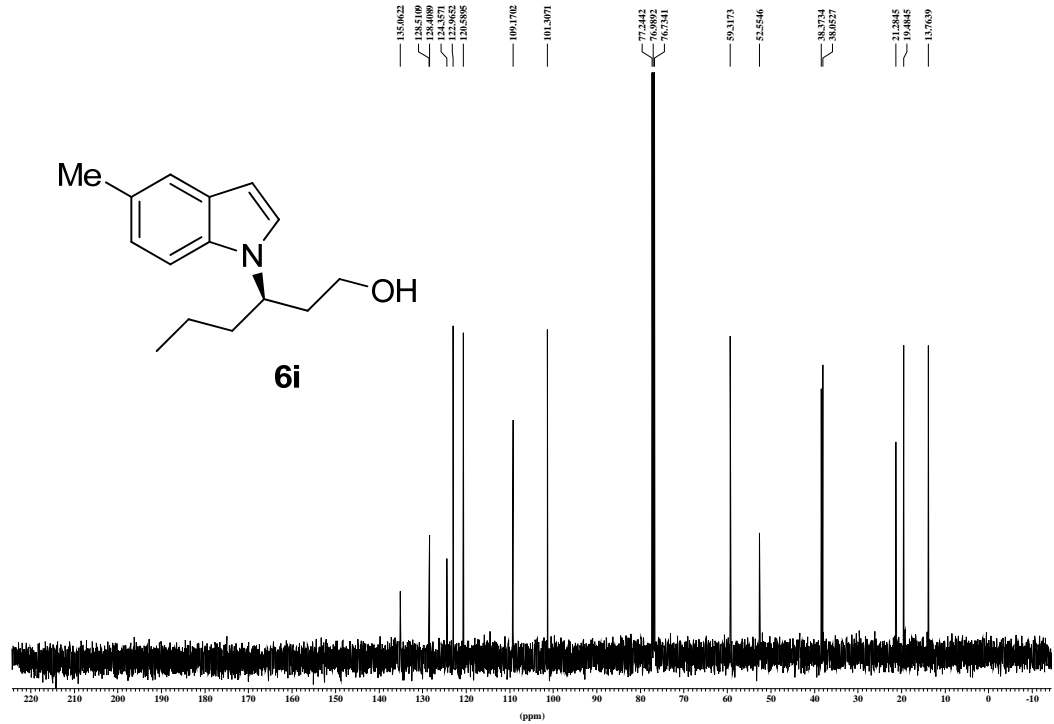

<sup>1</sup>H normal range AC300 ma05dxw-3 2020H

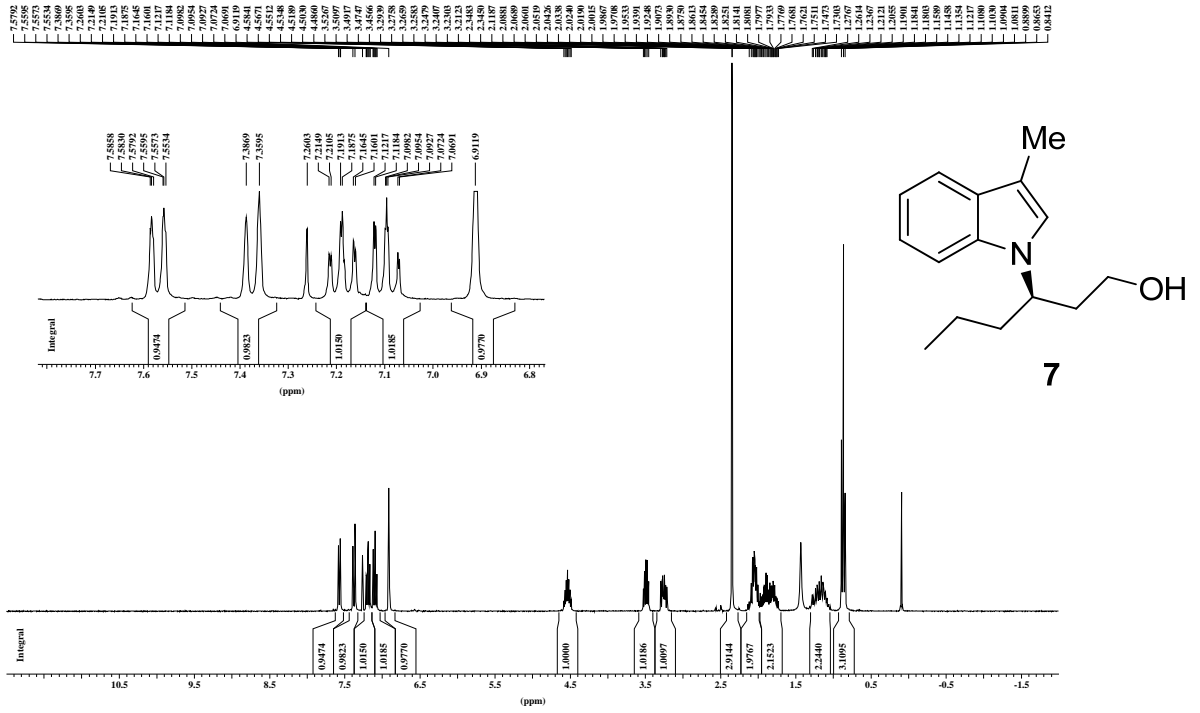

<sup>13</sup>C Standard AC300 ma05dxw-4 2020C

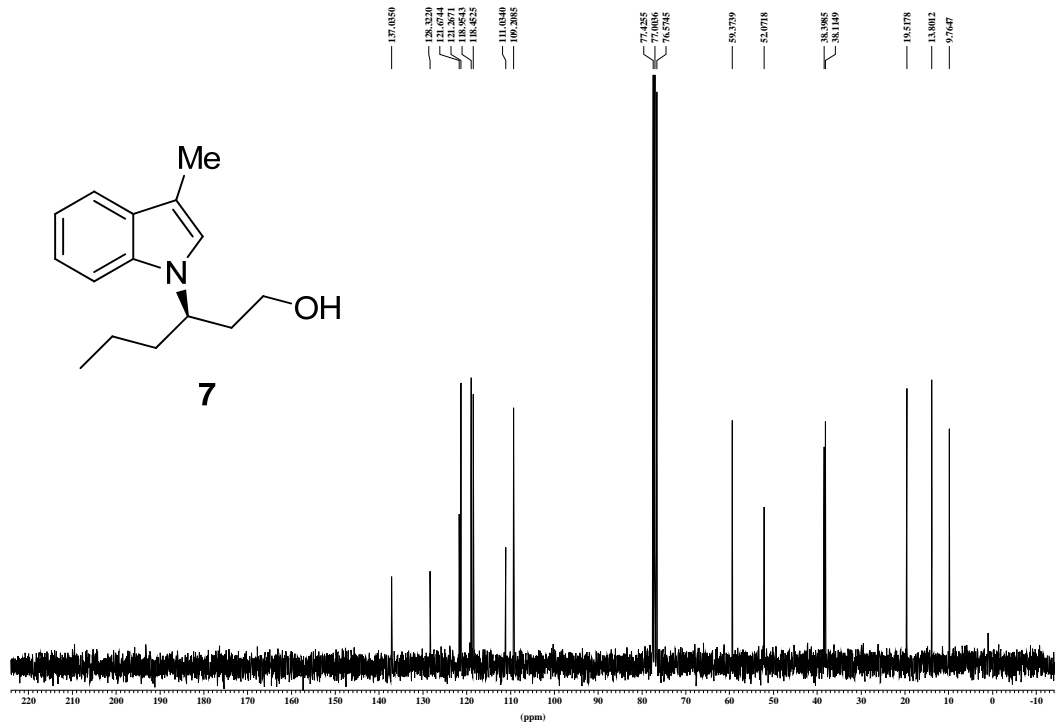







<sup>1</sup>H AMX500 indole 10

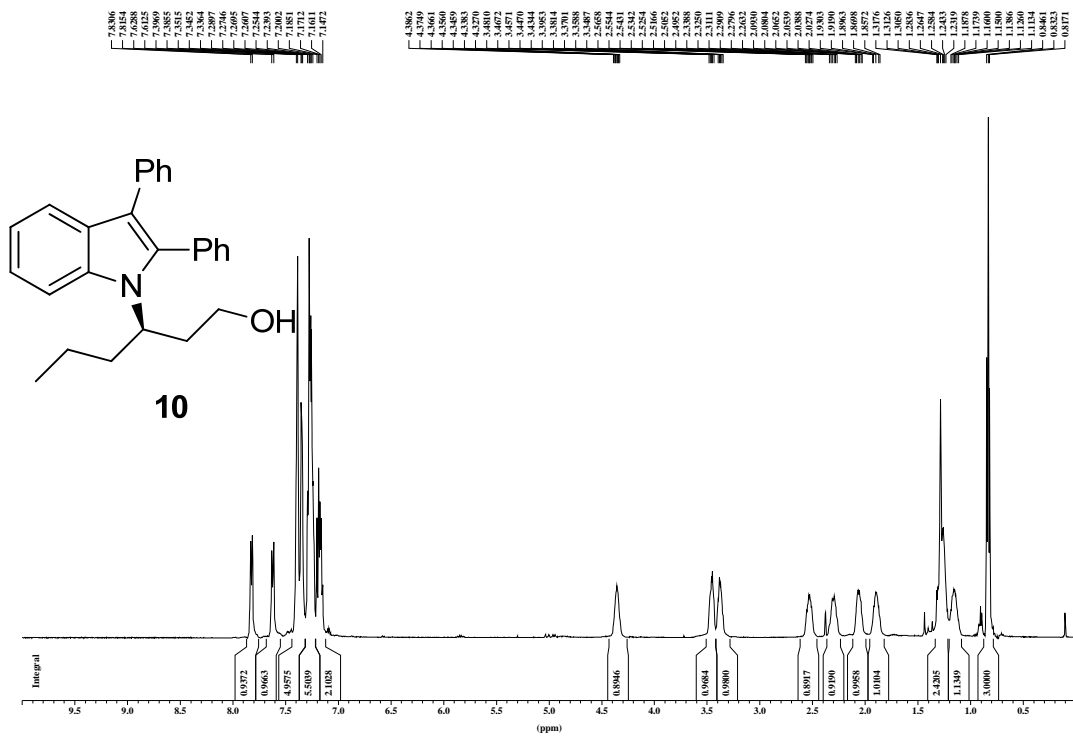

<sup>13</sup>C Standard AC300 j123dxw-2 10indole

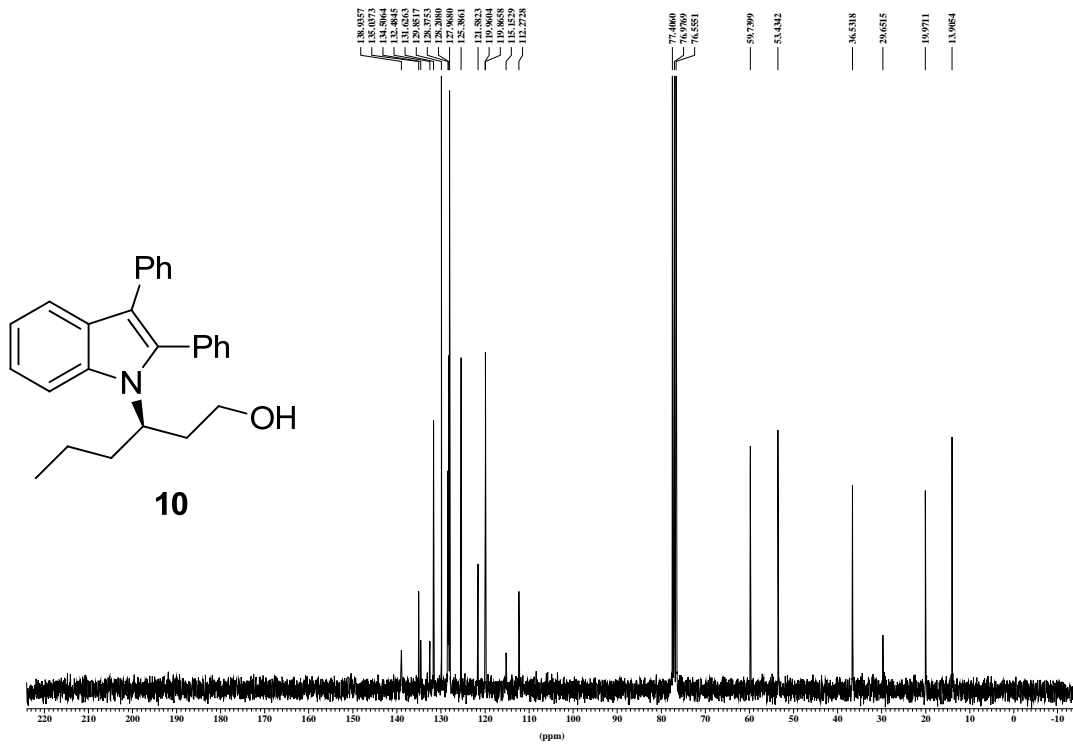

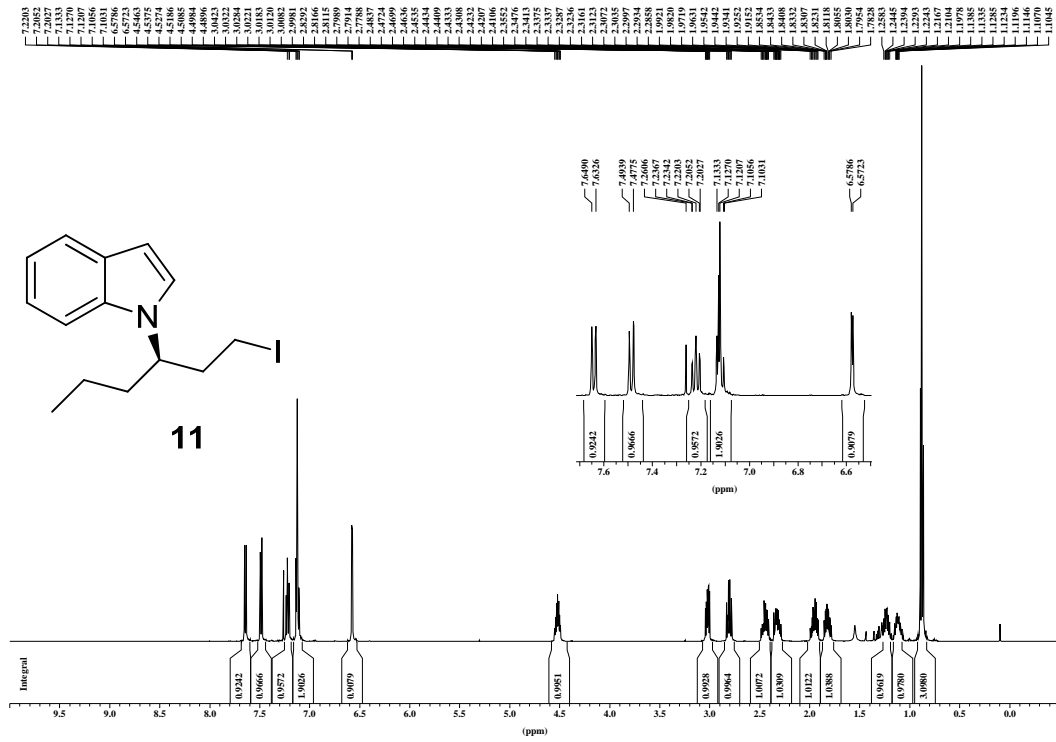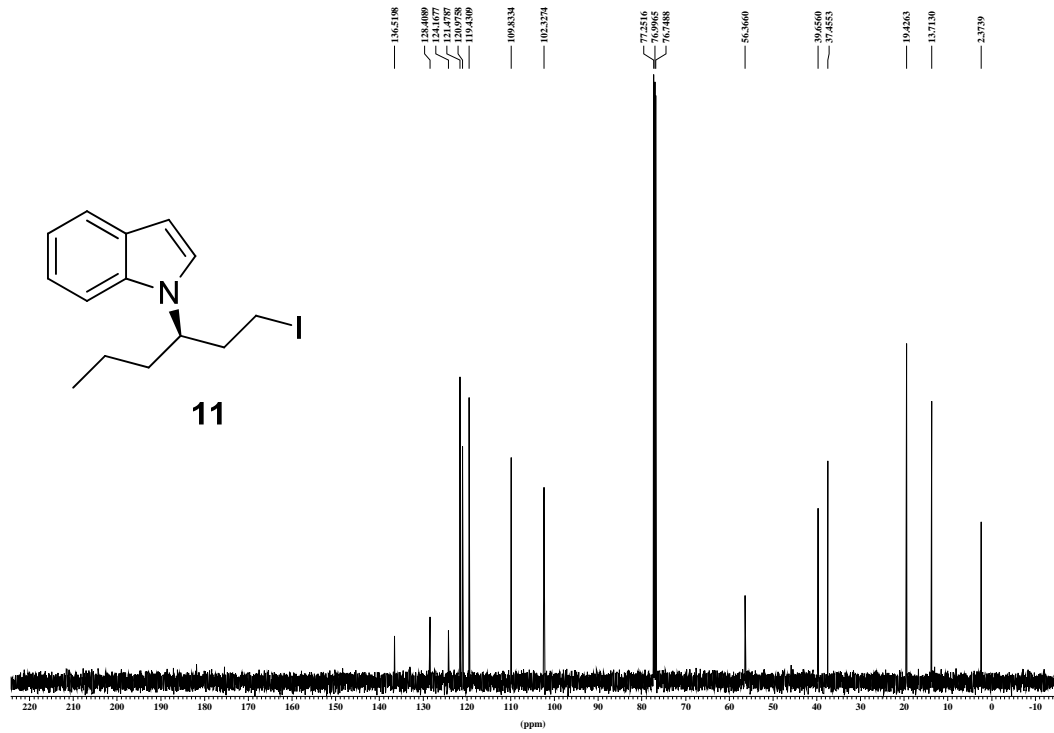

1H AMX500 dxw0319-3 2018H

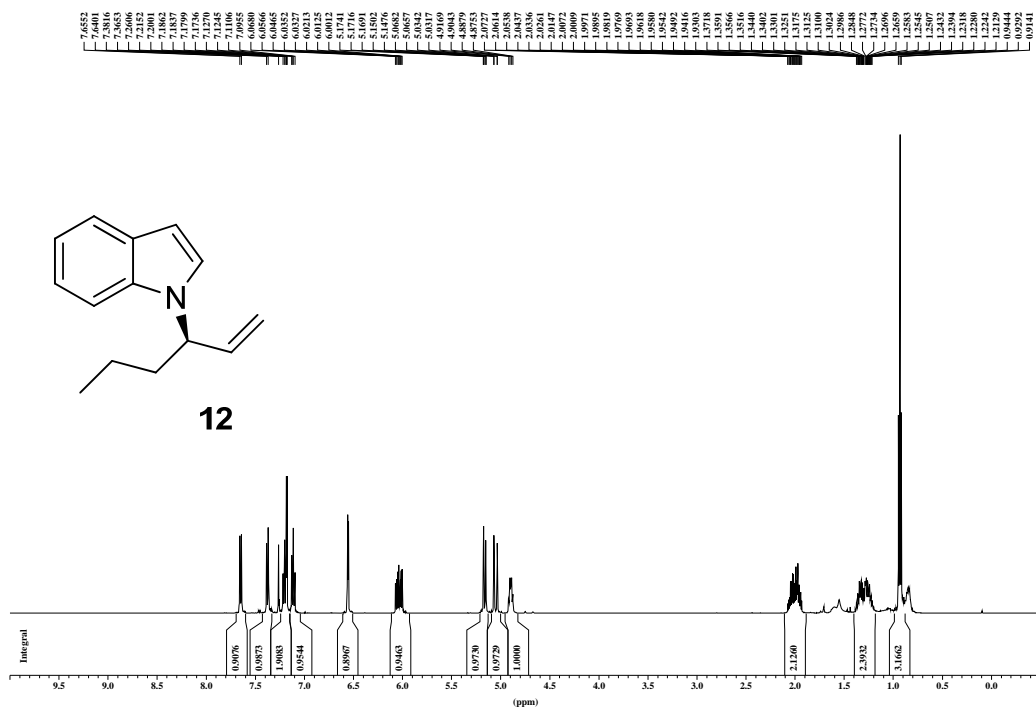

13C AMX500 dxw0319-4 2018C  
A1 hydr

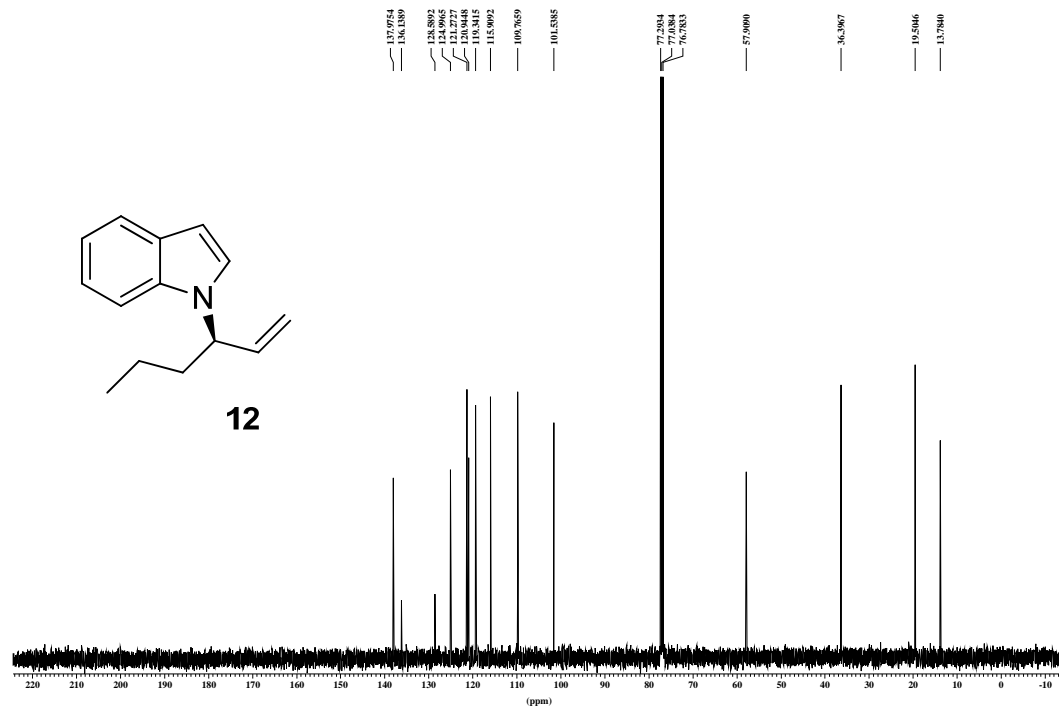

Supplement: c4cc04586f1.pdf [file c4cc04586f1.pdf]
